# Supplementary material
Source: PubMed Central journal article supplement (PMC2042138)
Supplement: NIHMS8373-supplement-2.pdf [file NIHMS8373-supplement-2.pdf]

## Efficient Synthesis of Trisimidazole and Glutaric Acid-Bearing Porphyrins:

### Active-Site Models of Bacterial Nitric Oxide Reductase (NOR)

James P. Collman,\* Yi-Long Yan, Jianping Lei, and Peter H. Dinolfo

*Department of Chemistry, Stanford University, California 94305-5080*

E-mail: [jpc@stanford.edu](mailto:jpc@stanford.edu)

## Supporting Information

### General method:

All reactions were performed in oven-dried flasks. Air and moisture-sensitive compounds were introduced *via* syringes through a rubber septum under N<sub>2</sub> atmosphere. All reagents were used as supplied commercially unless otherwise noted. THF were distilled from sodium metal-benzophenone before use. Dichloromethane was distilled over calcium hydride. Flash column chromatography was performed on E. Merck silica gel 60 (230–400 mesh ASTM). Nuclear magnetic resonance spectra were recorded in deuteriochloroform (CDCl<sub>3</sub>) unless otherwise indicated, with tetramethylsilane (TMS) as internal standard at ambient temperature on a Varian XL-400 or XL-500 Spectrometer.

### Preparation of Imidazolecarboxylic Acid Chlorides 2:

#### Scheme S1:

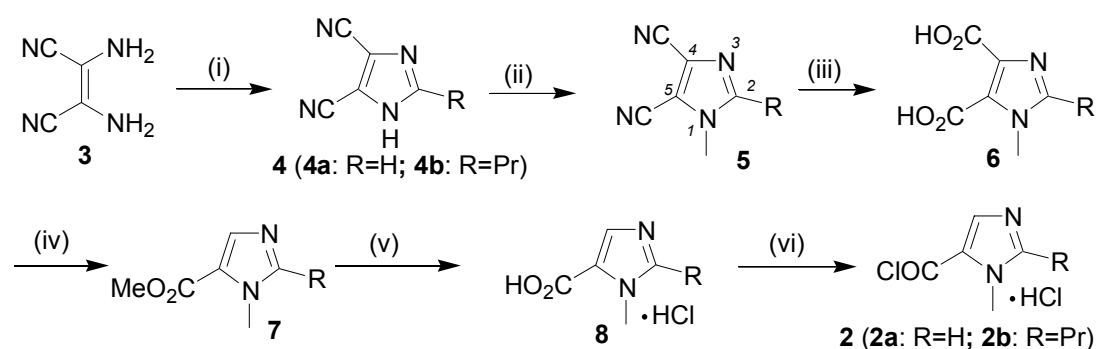

Reaction conditions: (i)  $(\text{CH}_3\text{O})_3\text{CR}$ , xylene,  $130^\circ\text{C}$ , 83–88%; (ii)  $\text{R}=\text{H}$ :  $(\text{CH}_3\text{O})_2\text{SO}_2$ ,  $\text{NaHCO}_3$ ;  $\text{R}=\text{Pr}$ :  $(\text{CH}_3\text{O})_3\text{CCH}_3$ , 84–90%; (iii) (a) 2.0 N  $\text{NaOH}$ , (b)  $\text{HCl}$ , 75–90%; (iv) (a)  $\text{Ac}_2\text{O}$ ,  $95\text{--}100^\circ\text{C}$ ; (b)  $\text{SOCl}_2$ , reflux, then  $\text{CH}_3\text{OH}$ , 60–69%; (v)  $\text{HCl}$ , reflux, 80–93%; (vi) Oxalyl Chloride,  $\text{CH}_3\text{CN}$ , 72–85%.

5-imidazolecarboxylic acid chlorides **2** were prepared following Scheme S1. Synthesis of 5-imidazolecarboxylic acid methyl esters **7** followed a literature procedure with modification as shown in the reaction conditions of Scheme S1.<sup>1</sup>

**General procedure for transformation of 5-imidazolecarboxylic acid methyl esters 7 to acids 8:** To 5-imidazolecarboxylic acid methyl esters **7b** (1.60 g, 8.8 mmol) was added concentrated hydrochloride acid (40 mL). The mixture was stirred and refluxed for 3 h. After removal of hydrochloride acid under vacuum, the solid was washed with  $\text{CH}_3\text{CN}/\text{Et}_2\text{O}$  (v/v 1/1) to give product 5-imidazolecarboxylic acid **8b** (1.67 g, 93%).  $^1\text{H}$  NMR (500 MHz,  $\text{DMSO-d}_6$ ): the carboxylic acid proton was not assigned,  $\delta$  8.23 (s, 1H), 3.91 (s, 3H), 2.98 (t,  $J = 7.5$  Hz, 2H), 1.71 (m, 2 H), 0.91 (t,  $J = 7.5$  Hz, 3H);  $^{13}\text{C}$  NMR ( $\text{DMSO-d}_6$ ): 159.56, 150.76, 124.90, 124.50, 33.25, 25.92, 19.74, 13.27; MS (ESI):  $m/e = 169.8$   $[\text{M}+\text{H}]^+$  for  $\text{C}_8\text{H}_{12}\text{N}_2\text{O}_2$ ; HRMS (ESI) for  $\text{C}_8\text{H}_{13}\text{N}_2\text{O}_2$   $[\text{M}+\text{H}]^+$ : calcd. 169.0977, found 169.0981.

**Characterization of 5-imidazolecarboxylic acid 8a** (prepared similarly to **8b**):  $^1\text{H}$  NMR (500 MHz,  $\text{DMSO-d}_6$ ): the carboxylic acid proton was not assigned,  $\delta$  7.87 (s, 1H), 7.58 (s, 1H), 3.82 (s, 3H);  $^{13}\text{C}$  NMR ( $\text{DMSO-d}_6$ ): 161.94, 143.81, 137.20, 124.11, 34.30; MS (ESI):  $m/e = 126.4$   $[\text{M}]^+$  for  $\text{C}_5\text{H}_6\text{N}_2\text{O}_2$ ; HRMS (ESI) for  $\text{C}_5\text{H}_7\text{N}_2\text{O}_2$   $[\text{M}+\text{H}]^+$ : calcd. 127.0508, found 127.0502.

**General procedure for transformation of 5-imidazolecarboxylic acids 8 to acid chlorides 2:** 5-imidazolecarboxylic acid hydrochloride **8b** (1.2 g, 5.9 mmol) was stirred in dry  $\text{CH}_3\text{CN}$  (10 mL). Oxalyl chloride (4.0 mL) was added followed by 2 drops of DMF. The reaction was stirred at room temperature for 4 h. After removal of most solvent  $\text{CH}_3\text{CN}$ , dry  $\text{Et}_2\text{O}$  (5 mL) was added. The mixture was stirred for further 10 min. Product 5-imidazolecarboxylic acid chloride hydrochloride **2b** (0.95 g, 72%) was collected by filtration. The product was used for next reaction without further purification.

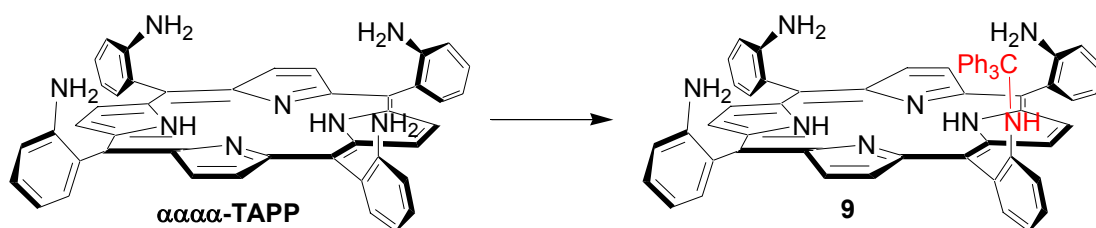

**Preparation of Compound 9:** Trityl bromide (185 mg, 0.57 mmol) was added to a solution of  $\alpha\alpha\alpha$ -TAPP (350 mg, 0.52 mmol) in dry  $\text{CH}_2\text{Cl}_2$  (100 mL) at  $0^\circ\text{C}$  followed by triethylamine (0.2 mL, 1.56 mmol). The mixture was stirred at  $0^\circ\text{C}$  for 2 h then concentrated under vacuum. The residue was purified by chromatography on silica gel with eluent  $\text{EtOAc}/\text{CH}_2\text{Cl}_2=5/95$  to give compound **9** (298 mg, 63%) as a solid. The compound is capable of atropisomerization at room temperature thus should be stored in a freezer.  $^1\text{H}$  NMR (500 MHz,  $\text{CDCl}_3$ ):  $\delta$  9.05 (s, 4H), 8.98-9.01 (m, 3H), 8.01 (dd,  $J = 1.5, 7.5$  Hz, 2H), 7.92 (dd,  $J = 1.5, 7.5$  Hz, 1H), 7.64–7.71 (m, 4H), 7.31 (t,  $J = 8$  Hz, 1H), 7.22–7.29 (m, 6H), 7.13–7.20 (m, 7H), 6.96–7.04 (m, 10H), 6.77 (d,  $J = 8.5$  Hz, 1H), 5.28 (s, 1H), 3.61 (s, br, 6H),  $-2.59$  (s, 2H);  $^{13}\text{C}$  NMR ( $\text{CDCl}_3$ ):  $\delta$  146.88, 145.46, 145.13, 135.41, 134.94, 134.81, 129.79, 128.68, 128.26, 127.91, 127.77, 126.90, 126.47, 117.68, 117.62, 116.55, 116.26, 116.00, 115.93, 115.75, 115.35, 115.30, 71.59; MS (ESI):  $m/e = 917.3$   $[\text{M}+\text{H}]^+$  for  $\text{C}_{63}\text{H}_{49}\text{N}_8$ . HRMS (ESI) for  $\text{C}_{63}\text{H}_{49}\text{N}_8$   $[\text{M}+\text{H}]^+$ : calcd.917.4056, found 917.4061.

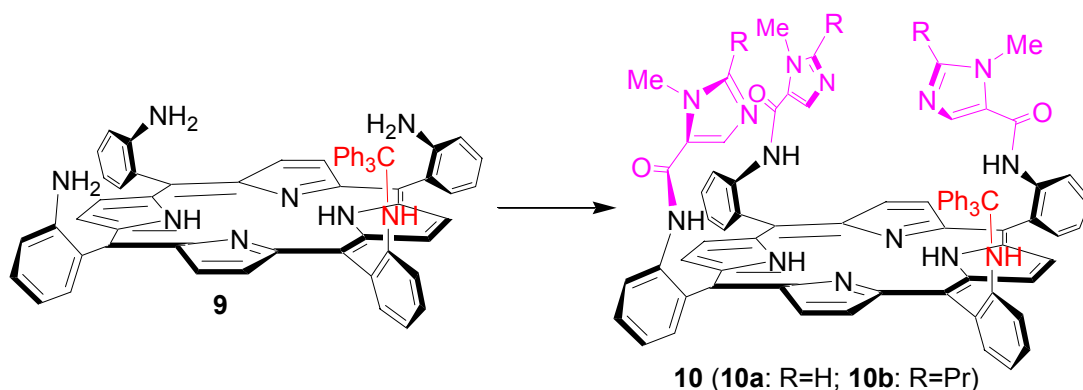

#### Preparation of Compound 10a:

1-methyl-5-imidazolecarboxylic acid hydrochloride **8a** (790 mg, 4.86 mmol) was stirred in dry acetonitrile (20 mL). Oxalyl chloride (3 mL) was added followed by 2 drops of DMF. The suspension was stirred at room temperature for 4 h. After removal of one half of the solvent under vacuum, dry diethyl ether (20 mL) was added. The

suspension was stirred for further 10 min. 1-methyl-5-imidazolecarboxylic acid chloride hydrochloride **2a** (~ 790 mg) was collected by filtration. The product was used without further purification.

The above 1-methyl-5-imidazolecarboxylic acid chloride hydrochloride **2a** (~ 790 mg) was stirred in dry acetonitrile (20 mL) at room temperature. *N,N*-Diethylaniline (1.1 mL) was added. A solution of compound **9** (430 mg, 0.47 mmol) in dry THF (20 mL) was added dropwise over a period of 1 h followed by further stirring for 30 min. Trace amount of mono- and bisimidazole-substituted porphyrins remained. The mixture was concentrated and washed with saturated NaHCO<sub>3</sub> water solution. After drying over Na<sub>2</sub>SO<sub>4</sub> and concentrated. The residue was purified by chromatography on silica gel with eluent CH<sub>3</sub>OH/CH<sub>2</sub>Cl<sub>2</sub> (40% saturated with NH<sub>3</sub> gas) = 5/95 to give compound **10a** (520 mg, 90%) as a solid. <sup>1</sup>H NMR (500 MHz, CDCl<sub>3</sub>): δ 8.87–8.98 (m, 8H), 8.46–8.49 (m, 3H), 8.31 (s, 1H), 8.10 (d, *J* = 7.5 Hz, 1H), 8.06–8.07 (d, *J* = 7.5 Hz, 3H), 7.84–7.89 (m, 3H), 7.58–7.62 (m, 3H), 7.36 (d, *J* = 7.5 Hz, 1H), 7.21 (t, *J* = 7.5 Hz, 1H), 7.05–7.09 (m, 8H), 6.84–6.90 (m, 12H), 67.00 (d, *J* = 8.5 Hz, 1H), 5.87 (s, 2H), 5.60 (s, 1H), 5.21 (s, 1H), 3.57 (s, 3H), 3.27 (s, 6H), –2.58 (s, 2H); <sup>13</sup>C NMR (CDCl<sub>3</sub>): δ 159.06, 159.00, 144.97, 141.35, 141.21, 138.60, 138.13, 135.58, 135.47, 133.27, 132.90, 132.18, 131.93, 129.75, 128.52, 128.35, 127.78, 127.41, 126.60, 125.75, 125.67, 124.05, 123.55, 117.02, 116.69, 116.54, 115.35, 114.95, 71.55, 33.71, 33.36; MS (ESI): *m/e* for C<sub>78</sub>H<sub>61</sub>N<sub>14</sub>O<sub>3</sub> [M+H]<sup>+</sup> calcd. 1241.5, found 1241.5. HRMS (ESI) for C<sub>78</sub>H<sub>61</sub>N<sub>14</sub>O<sub>3</sub> [M+H]<sup>+</sup>: calcd. 1241.5051, found 1241.5081.

**Characterization of 10b (prepared similarly to 10a):** A solid; <sup>1</sup>H NMR (500 MHz, CDCl<sub>3</sub>): δ 8.83–8.98 (m, 8H), 8.48 (d, *J* = 7.0 Hz, 1H), 8.35 (d, *J* = 8.0 Hz, 2H), 8.20–8.34 (m, 2H), 8.13 (d, *J* = 7.5 Hz, 1H), 7.99 (d, *J* = 7.5 Hz, 2H), 7.82–7.85 (m, 3H), 7.53–7.61 (m, 3H), 7.35 (d, *J* = 7.0 Hz, 1H), 7.18 (t, *J* = 7.5 Hz, 1H), 6.85–7.00 (m, 17H), 6.64 (d, *J* = 8.5 Hz, 1H), 6.13 (s, 2H), 5.27 (s, 1H), 5.15 (s, 1H), 3.67 (s, 3H), 3.34 (s, 6H), 2.41 (t, *J* = 7.0 Hz, 2H), 1.95–1.99 (m, 4H), 1.47–1.51 (m, 2H), 1.16–1.28 (m, 4H), 0.79 (t, *J* = 7.5 Hz, 3H), 0.61 (t, *J* = 7.5 Hz, 6H), –2.61 (s, 2H); <sup>13</sup>C NMR (CDCl<sub>3</sub>): δ 159.77, 159.45, 152.52, 145.17, 138.82, 138.14, 135.88, 135.76, 135.23, 129.54, 128.56, 128.29, 127.82, 127.55, 126.57, 125.48, 124.06, 116.75, 116.59, 116.38, 115.23, 71.53, 53.50, 31.69, 28.43, 20.83, 20.26, 13.85, 13.70; MS (ESI): *m/e* for C<sub>87</sub>H<sub>79</sub>N<sub>14</sub>O<sub>3</sub> [M+H]<sup>+</sup> 1367.8; HRMS (ESI) for C<sub>87</sub>H<sub>79</sub>N<sub>14</sub>O<sub>3</sub> [M+H]<sup>+</sup>: calcd. 1367.6460, found 1364.6467.

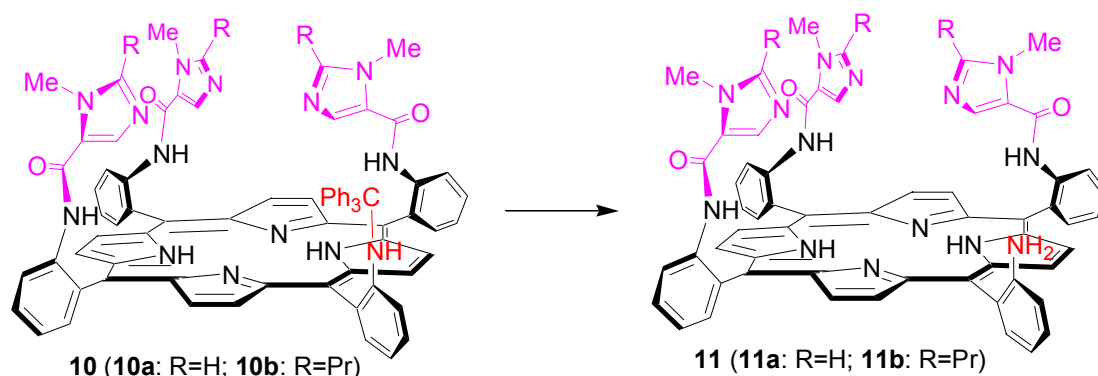

**Preparation of Compound 11a:** To a solution of compound **10a** (100 mg, 0.08 mmol) in dichloromethane (50 mL) was added trifluoroacetic acid (100  $\mu$ L). The solution was stirred at room temperature for 30 min. After washed with saturated NaHCO<sub>3</sub> water solution and dried over Na<sub>2</sub>SO<sub>4</sub>, the dichloromethane solution was concentrated. The residue was purified by chromatography on silica gel with eluent CH<sub>3</sub>OH/CH<sub>2</sub>Cl<sub>2</sub> (40% saturated with NH<sub>3</sub> gas) = 5/95 to give compound **11a** (75 mg, 94%) as a solid. <sup>1</sup>H NMR (500 MHz, CDCl<sub>3</sub>):  $\delta$  8.86–8.94 (m, 8H), 8.56 (d,  $J$  = 7.5 Hz, 2H), 8.44 (d,  $J$  = 7.5 Hz, 1H), 8.12–8.15 (m, 3H), 8.07 (s, 1H), 7.95 (s, 2H), 7.82–7.86 (m, 4H), 7.55–7.60 (m, 4H), 7.12 (t,  $J$  = 7.0 Hz, 1H), 7.07 (d,  $J$  = 8.0 Hz, 1H), 6.95 (s, 2H), 6.91 (s, 1H), 5.50 (s, 1H), 5.39 (s, 2H), 3.57 (s, 3H), 3.49 (s, 6H), 3.29 (s, br, 2H, NH<sub>2</sub>), -2.56 (s, 2H); <sup>13</sup>C NMR (CDCl<sub>3</sub>):  $\delta$  158.99, 158.41, 147.44, 141.24, 138.37, 138.27, 135.45, 135.24, 134.43, 133.07, 132.18, 132.00, 131.09, 129.97, 129.84, 129.71, 125.97, 125.82, 125.63, 124.03, 123.78, 123.60, 122.20, 117.82, 117.15, 115.37, 114.81, 114.59, 33.74, 33.60; MS (ESI):  $m/e$  for C<sub>59</sub>H<sub>47</sub>N<sub>14</sub>O<sub>3</sub> [M+H]<sup>+</sup> 999.4; HRMS (ESI) for C<sub>59</sub>H<sub>47</sub>N<sub>14</sub>O<sub>3</sub> [M+H]<sup>+</sup>: calcd. 999.3956, found 999.3908.

**Characterization of 11b (prepared similarly to 11a):** A solid; <sup>1</sup>H NMR (500 MHz, CDCl<sub>3</sub>):  $\delta$  8.81–8.94 (m, 8H), 8.57 (d,  $J$  = 8.0 Hz, 2H), 8.39 (d,  $J$  = 8.0 Hz, 1H), 8.20 (s, 1H), 8.09–8.14 (m, 3H), 8.05 (s, 2H), 7.81–7.85 (m, 4H), 7.55–7.60 (m, 4H), 7.09–7.13 (m, 2H), 5.47 (s, 2H), 5.35 (s, 1H), 3.54 (s, 5H, CH<sub>3</sub>+NH<sub>2</sub>), 3.52 (s, 6H), 2.19–2.24 (m, 6H), 1.27–1.33 (m, 6H), 0.63–0.68 (m, 9H), -2.55 (s, 2H); <sup>13</sup>C NMR (CDCl<sub>3</sub>):  $\delta$  159.54, 159.02, 152.56, 152.46, 147.60, 138.63, 138.48, 135.54, 135.39, 134.45, 133.34, 132.13, 130.94, 130.42, 129.93, 129.75, 129.58, 126.14, 125.67, 125.38, 124.04, 123.96, 123.53, 122.10, 117.74, 117.10, 115.44, 114.98, 114.67, 31.77, 31.64, 28.44, 20.49, 20.46, 13.68; MS (ESI):  $m/e$  for C<sub>68</sub>H<sub>65</sub>N<sub>14</sub>O<sub>3</sub> [M+H]<sup>+</sup> 1125.5; HRMS (ESI) for C<sub>68</sub>H<sub>65</sub>N<sub>14</sub>O<sub>3</sub> [M+H]<sup>+</sup>: calcd. 1125.5364, found 1125.5347.

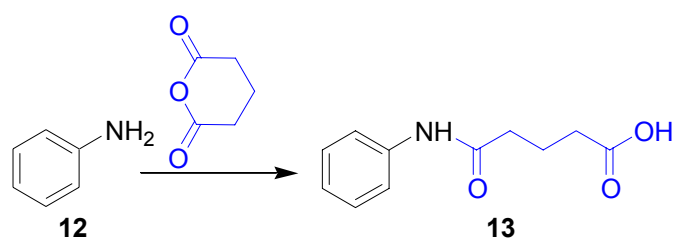

**Preparation of Compound 13:** Pure phenylamine (200  $\mu$ L, 2.2 mmol) was stirred in dry  $\text{CH}_2\text{Cl}_2$  (30 mL). Glutaric anhydride (280 mg, 2.5 mmol) was added followed by  $\text{NEt}_3$  (0.9 mL). The reaction mixture was stirred at room temperature for 4 h. The mixture was concentrated and purified by column chromatography on silica gel with eluent  $\text{CH}_3\text{OH}/\text{CH}_2\text{Cl}_2 = 5/95$  to give compound **13** (400 mg, 88%) as a solid.  $^1\text{H}$  NMR (500 MHz,  $\text{DMSO-d}_6$ ): the carboxylic acid proton was not assigned,  $\delta$  9.89 (s, 1H), 7.56 (d,  $J = 8.0$  Hz, 2H), 7.26 (t,  $J = 8.0$  Hz, 2H), 7.00 (t,  $J = 8.0$  Hz, 1H), 2.33 (t,  $J = 7.5$  Hz, 2H), 2.27 (t,  $J = 7.5$  Hz, 2H), 1.79 (m, 2H);  $^{13}\text{C}$  NMR ( $\text{DMSO-d}_6$ ): 170.81, 139.31, 128.71, 123.04, 119.10, 35.45, 20.56; MS (ESI):  $m/e = 207.9$  for  $\text{C}_{11}\text{H}_{14}\text{NO}_3$   $[\text{M}+\text{H}]^+$ ; HRMS (ESI) for  $\text{C}_{11}\text{H}_{13}\text{NO}_3\text{Na}$   $[\text{M}+\text{Na}]^+$ : calcd. 230.0793, found 230.0782.

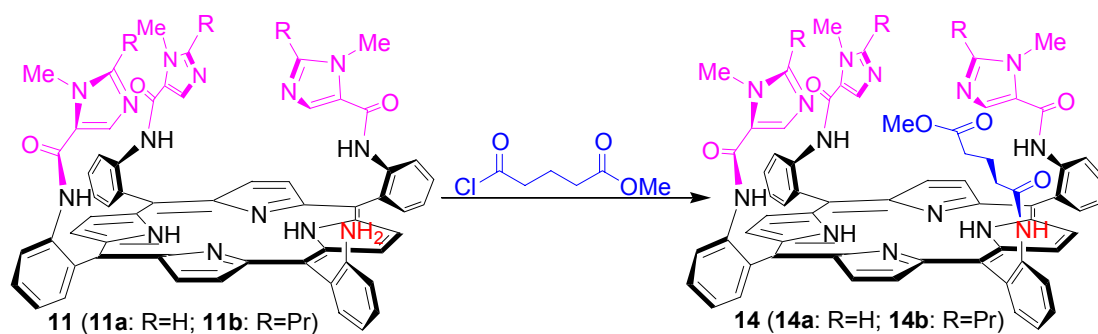

**Preparation of Compound 14a:** To a stirred solution of **11a** (200 mg, 0.2 mmol) in dry THF (30 mL), was added *N,N*-diethylaniline (0.16 mL, 1.0 mmol) followed by methyl 5-chloro-5-oxo-3-oxopentanoate (138  $\mu$ L, 1.0 mmol). The mixture was stirred at room temperature for 1 h. After removal of THF solvent, the residue was re-dissolved in  $\text{CH}_2\text{Cl}_2$  (60 mL). The solution was washed with saturated  $\text{NaHCO}_3$  water solution.  $\text{CH}_2\text{Cl}_2$  layer was dried over  $\text{Na}_2\text{SO}_4$  and then concentrated. The residue was purified by chromatography on silica gel with eluent  $\text{CH}_3\text{OH}/\text{CH}_2\text{Cl}_2$  (40% saturated with  $\text{NH}_3$  gas) = 8/95 to give compound **14a** (195 mg, 86%) as a solid.  $^1\text{H}$  NMR (500 MHz,  $\text{CDCl}_3$ ):  $\delta$  8.85–8.91 (m, 8H), 8.54 (d,  $J = 8.0$  Hz, 2H), 8.37 (d,  $J = 8.0$  Hz, 1H), 8.32 (d,  $J = 8.5$  Hz, 1H), 8.25 (s, 1H), 8.09–8.12 (m, 3H), 7.99 (s, 1H), 7.91–7.94 (m, 3H),

7.83–7.86 (m, 3H), 7.78 (t,  $J = 7.5$  Hz, 1H), 7.56–7.61 (m, 3H), 7.49 (t,  $J = 7.0$  Hz, 1H), 7.02 (s, 2H), 6.94 (s, 1H), 5.61 (s, 1H), 5.16 (s, 2H), 3.66 (s, 6H), 3.58 (s, 3H), 2.79 (s, 3H), 1.49–1.55 (m, 4H), 1.20 (t,  $J = 7.5$  Hz, 2H),  $-2.55$  (s, 2H);  $^{13}\text{C}$  NMR ( $\text{CDCl}_3$ ):  $\delta$  173.03, 171.80, 159.09, 158.51, 141.35, 141.22, 138.46, 138.20, 135.42, 135.20, 135.02, 133.45, 133.38, 132.18, 131.79, 131.61, 129.86, 129.71, 129.55, 125.78, 125.68, 124.79, 124.22, 124.12, 123.83, 122.47, 116.31, 115.22, 115.00, 50.83, 34.90, 33.76, 32.18, 23.89, 20.23; MS (ESI):  $m/e$  1127.5 for  $\text{C}_{65}\text{H}_{55}\text{N}_{14}\text{O}_6$   $[\text{M}+\text{H}]^+$ ; HRMS (ESI) for  $\text{C}_{65}\text{H}_{55}\text{N}_{14}\text{O}_6$   $[\text{M}+\text{H}]^+$  calcd. 1127.4429, found 1127.4425.

**Characterization of 14b (prepared similarly to 14a):** A solid;  $^1\text{H}$  NMR (500 MHz,  $\text{CDCl}_3$ ):  $\delta$  8.85–8.91 (m, 8H), 8.57–8.59 (d,  $J = 8.0$  Hz, 2H), 8.45 (s, 1H), 8.37 (s, 1H), 8.33 (d,  $J = 8.5$  Hz, 1H), 8.18 (d,  $J = 8.5$  Hz, 1H), 8.00–8.08 (m, 4H), 7.99 (d, 7.5 Hz, 2H), 7.77–7.85 (m, 4H), 7.50–7.59 (m, 4H), 5.50 (s, 1H), 5.01 (s, 2H), 3.66 (s, 6H), 3.57 (s, 3H), 2.37 (s, 3H), 2.29 (t,  $J = 8.0$  Hz, 4H), 2.19 (t,  $J = 7.5$  Hz, 2H), 1.57 (t,  $J = 6.5$  Hz, 2H), 1.34–1.38 (m, 4H), 1.26 (t,  $J = 7.5$  Hz, 2H), 1.15 (t,  $J = 7.5$  Hz, 2H), 0.92 (t,  $J = 7.5$  Hz, 2H), 0.73 (t,  $J = 7.5$  Hz, 6H), 0.65 (t,  $J = 7.5$  Hz, 3H),  $-2.50$  (s, 2H);  $^{13}\text{C}$  NMR ( $\text{CDCl}_3$ ):  $\delta$  172.49, 171.89, 159.67, 159.06, 152.68, 152.43, 138.69, 138.59, 138.33, 135.35, 134.77, 134.66, 133.88, 132.19, 130.84, 129.65, 129.45, 125.71, 125.54, 125.37, 124.73, 124.17, 123.62, 122.62, 116.39, 115.26, 115.09, 50.40, 34.79, 31.77, 28.51, 28.45, 20.58, 20.38, 20.05, 13.70, 13.63; MS (ESI):  $m/e$  1253.6 for  $\text{C}_{74}\text{H}_{73}\text{N}_{14}\text{O}_6$   $[\text{M}+\text{H}]^+$ ; HRMS (ESI) for  $\text{C}_{74}\text{H}_{73}\text{N}_{14}\text{O}_6$   $[\text{M}+\text{H}]^+$  calcd. 1253.5838, found 1253.5844.

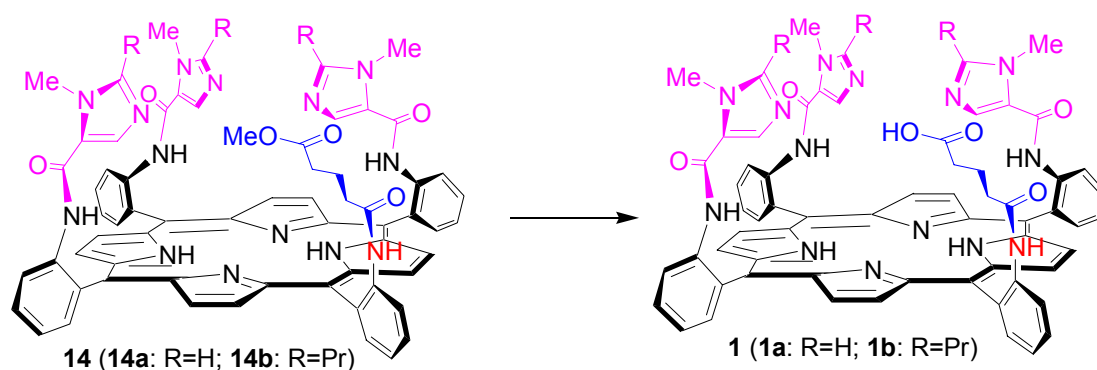

**Preparation of Compound 1:** Compound **14a** (85 mg, 0.075 mmol) was dissolved in a mixed solvent of  $\text{CH}_3\text{OH}/\text{THF}$  (20 mL, v/v=1/1). Potassium hydroxide (1.0 g) water solution (10 mL) was added. The mixture was stirred at room temperature for 2 h. After removal of organic solvent under vacuum, the mixture was extracted with

CH<sub>2</sub>Cl<sub>2</sub> and washed with saturated NaHCO<sub>3</sub> solution. The organic extract was dried over Na<sub>2</sub>SO<sub>4</sub> and concentrated. The residue was purified by chromatography on silica with eluent CH<sub>3</sub>OH/CH<sub>2</sub>Cl<sub>2</sub> (saturated with NH<sub>3</sub> gas)=20/80 to give compound **1a** (73 mg, 87%) as a solid. <sup>1</sup>H NMR (500 MHz, CDCl<sub>3</sub>): the carboxylic acid proton is not assigned, δ 8.77–8.94 (m, 8H), 8.71 (d, *J* = 8.0 Hz, 1H), 8.38 (d, *J* = 5.5 Hz, 2H), 8.23 (d, *J* = 7.0 Hz, 1H), 8.14 (d, *J* = 8.0 Hz, 1H), 8.07 (s, 1H), 8.03 (d, *J* = 7.0 Hz, 1H), 7.95 (d, *J* = 5.5 Hz, 2H), 7.78–7.88 (m, 5H), 7.61 (t, *J* = 7.5 Hz, 1H), 7.52–7.57 (m, 3H), 7.30 (s, 1H), 6.96 (s, 2H), 6.75 (s, 1H), 5.58 (s, 2H), 4.21 (s, 1H), 3.64 (s, 6H), 3.53 (s, 3H), 1.61 (t, *J* = 6.5 Hz, 2H), 1.12 (t, *J* = 6.5 Hz, 2H), 0.84–0.87 (m, 4H), –2.59 (s, 2H); <sup>13</sup>C NMR (CDCl<sub>3</sub>): δ 174.68, 172.15, 159.27, 157.35, 140.83, 140.27, 138.71, 138.59, 138.23, 136.14, 134.91, 134.34, 132.15, 131.40, 130.34, 130.12, 129.63, 129.50, 128.41, 126.25, 125.98, 125.43, 124.43, 123.96, 123.58, 120.27, 116.81, 113.22, 35.33, 33.73, 33.62, 32.32, 29.75, 20.29; MS (ESI): *m/e* 1113.4 for C<sub>64</sub>H<sub>53</sub>N<sub>14</sub>O<sub>6</sub> [M+H]<sup>+</sup>; HRMS (ESI) for C<sub>64</sub>H<sub>53</sub>N<sub>14</sub>O<sub>6</sub> [M+H]<sup>+</sup> calcd. 1113.4273, found 1113.4279.

**Characterization of 1b (prepared similarly to 1a):** A solid; <sup>1</sup>H NMR (500 MHz, CDCl<sub>3</sub>): the carboxylic acid proton is not assigned, δ 8.79–8.95 (m, 9H), 8.44 (s, 2H), 8.40 (s, 2H), 8.14 (d, *J* = 7.0 Hz, 1H), 8.07 (d, *J* = 7.5 Hz, 1H), 8.03 (d, *J* = 8.5 Hz, 1H), 7.95 (s, 2H), 7.79–7.88 (m, 5H), 7.55–7.59 (m, 3H), 7.51 (t, *J* = 7.5 Hz, 2H), 5.60 (s, 2H), 4.51 (s, 1H), 3.69 (s, 6H), 3.54 (s, 3H), 2.31–2.38 (m, 4H), 2.16 (t, *J* = 7.5 Hz, 2H), 1.60 (t, *J* = 6.5 Hz, 2H), 1.43–1.45 (m, 4H), 1.12–1.17 (m, 2H), 0.78–0.81 (m, 8H), 0.56 (t, *J* = 7.5 Hz, 3H), 0.46 (t, *J* = 6.0 Hz, 2H), –2.56 (s, 2H); <sup>13</sup>C NMR (CDCl<sub>3</sub>): δ 174.67, 172.38, 159.88, 157.94, 152.41, 151.91, 138.81, 138.59, 138.41, 136.14, 135.00, 134.50, 131.33, 131.14, 129.95, 129.47, 127.52, 127.02, 125.91, 125.27, 124.70, 123.74, 123.38, 120.26, 116.99, 113.23, 35.65, 32.41, 31.86, 31.64, 28.58, 28.05, 20.74, 20.27, 20.11, 13.77, 13.52; MS (ESI): *m/e* 1239.6 for C<sub>73</sub>H<sub>71</sub>N<sub>14</sub>O<sub>6</sub> [M+H]<sup>+</sup>; HRMS (ESI) for C<sub>73</sub>H<sub>71</sub>N<sub>14</sub>O<sub>6</sub> [M+H]<sup>+</sup> calcd. 1239.5681, found 1239.5709.

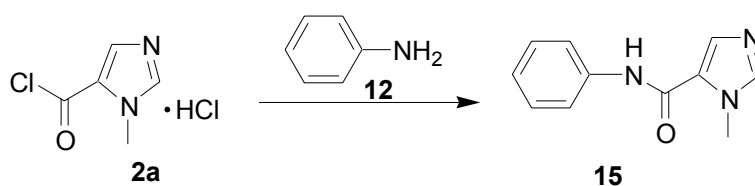



**Preparation of Compound 15:** Freshly prepared imidazole acid chloride hydrochloride **2a** (165 mg, 1.0 mmol) was stirred in dry CH<sub>3</sub>CN (10 mL). Aniline (180 μL, 2.0 mmol) was added via a syringe followed by pyridine (240 μL, 3.0 mmol). The reaction was stirred for further 3 h under N<sub>2</sub> atmosphere at room temperature. After removal of solvent, the residue was dissolved in CH<sub>2</sub>Cl<sub>2</sub> and washed with NaHCO<sub>3</sub> solution. The organic extract was concentrated and purified by chromatography on silica gel with eluent CH<sub>3</sub>OH/CH<sub>2</sub>Cl<sub>2</sub> =3/97 to give compound **15** (122 mg, 61%) as a solid. <sup>1</sup>H NMR (500 MHz, CDCl<sub>3</sub>): δ 8.18 (s, 1H), 7.60 (s, 1H), 7.54 (d, *J* = 7.0 Hz, 2H), 7.52 (s, 1H), 7.33 (t, *J* = 7.0 Hz, 2H), 7.12 (t, *J* = 7.0 Hz, 1H), 3.93 (s, 3H); <sup>13</sup>C NMR (CDCl<sub>3</sub>): δ 158.60, 142.22, 137.54, 132.14, 129.16, 124.69, 120.44, 34.30; MS (ESI): *m/e* 201.9 for C<sub>11</sub>H<sub>12</sub>N<sub>3</sub>O [M+H]<sup>+</sup>; HRMS (ESI) for C<sub>11</sub>H<sub>12</sub>N<sub>3</sub>O [M+H]<sup>+</sup> calcd. 202.0980, found 202.0987.

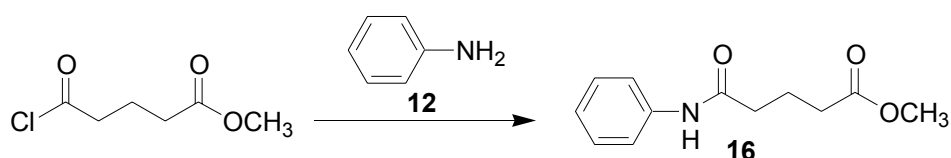

**Preparation of Compound 16:** To a stirred solution of aniline **12** (0.30 mL, 3.25 mmol) in dry THF (20 mL) was added methyl 5-chloro-5-oxovalerate (0.20 mL, 1.45 mmol) via a syringe followed by pyridine (0.46 mL, 5.8 mmol). The reaction was stirred for further 2 h under N<sub>2</sub> atmosphere at room temperature. After removal of solvent, the residue was dissolved in CH<sub>2</sub>Cl<sub>2</sub> and washed with NaHCO<sub>3</sub> solution. The organic extract was concentrated and purified by chromatography on silica gel with eluent CH<sub>3</sub>OH/CH<sub>2</sub>Cl<sub>2</sub> =3/97 to give compound **16** (262 mg, 82%) as a solid. A solid; <sup>1</sup>H NMR (500 MHz, CDCl<sub>3</sub>): δ 7.75 (s, 1H), 7.48 (d, *J* = 8.0 Hz, 2H), 7.27 (t, *J* = 7.5 Hz, 2H), 7.06 (t, *J* = 7.5 Hz, 1H), 3.64 (s, 3H), 2.37–2.41 (m, 4H), 2.01 (p, *J* = 7.5 Hz, 2H); <sup>13</sup>C NMR (CDCl<sub>3</sub>): δ 174.11, 170.94, 138.17, 129.21, 124.49, 120.12, 51.97, 36.58, 33.22, 21.02; MS (ESI): *m/e* 221.9 for C<sub>12</sub>H<sub>16</sub>NO<sub>3</sub> [M+H]<sup>+</sup>; HRMS (ESI) for C<sub>12</sub>H<sub>16</sub>NO<sub>3</sub> [M+H]<sup>+</sup> calcd. 222.1130, found 222.1124.

#### Reference:

- O'Connell, J. F.; Parquette, J.; Yelle, W. E.; Wang, W.; Rapoport, H.

*Synthesis*, **1988**, 767.

**Figure s1:**  $^1\text{H}$  NMR spectrum of compound **14a** in  $\text{CDCl}_3$

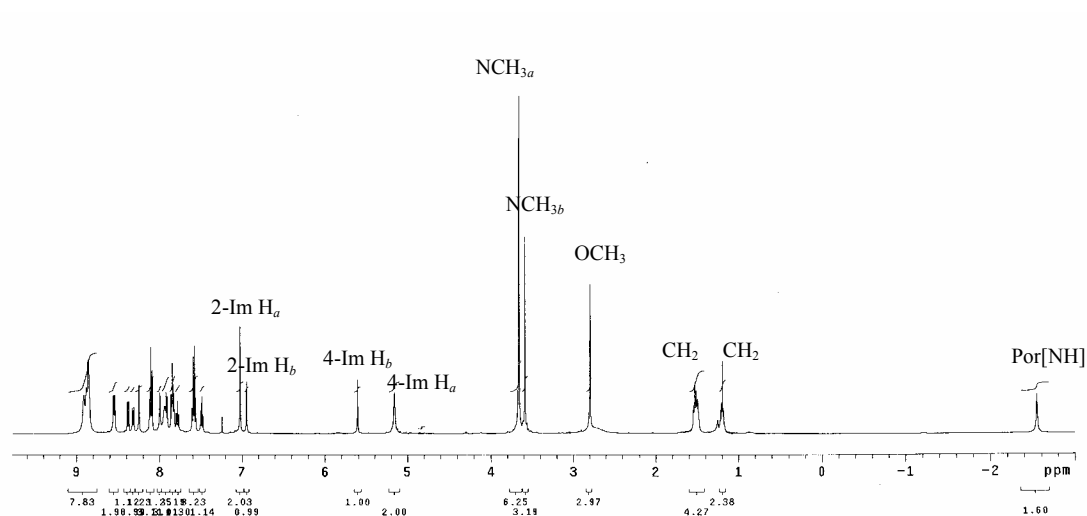

**Figure s2:**  $^1\text{H}$  NMR chemical shifts for porphyrin compound **14a** and its non-porphyrin analogues **15**, **16** in  $\text{CDCl}_3$

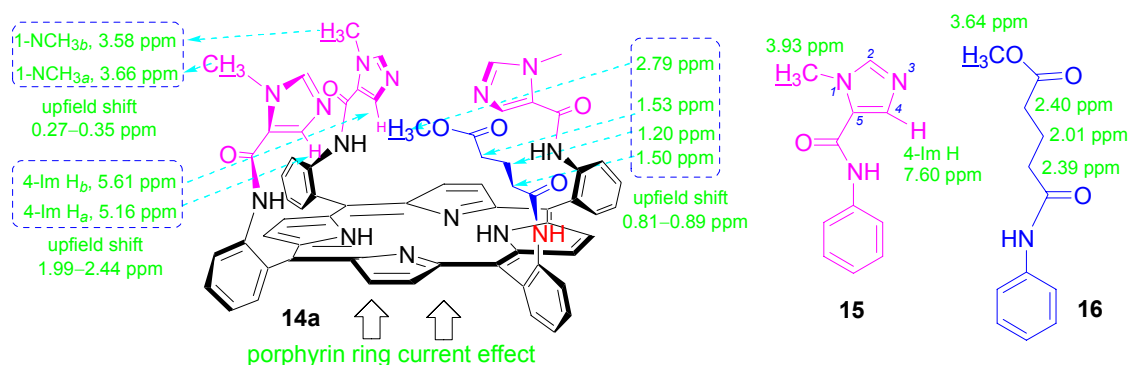

**Interpretation of Figure s1 and s2:** Compared to those of non-porphyrin analogues, the chemical shifts of substituents closer to the porphyrin ring center are strongly shifted upfield due to the ring current effect of the porphyrin ring. In compound **14a**, the diagnostic imidazole proton 4-Im H strongly shifts upfield 1.99–2.44 ppm when compared with its non-porphyrin analogue **15**, which is much more than that of imidazole 1-NCH<sub>3</sub> (0.27–0.35 ppm), suggesting that 4-Im H is close to the porphyrin center while 1-NMe is located at the porphyrin periphery. The upfield shift (0.81–0.89 ppm) of glutamic methyl ester group on compound **14a** compared to its analogue **16** implies that this glutamic moiety is suspended over the porphyrin plane.

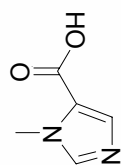

Compound 8a  
<sup>1</sup>H NMR in DMSO-d6

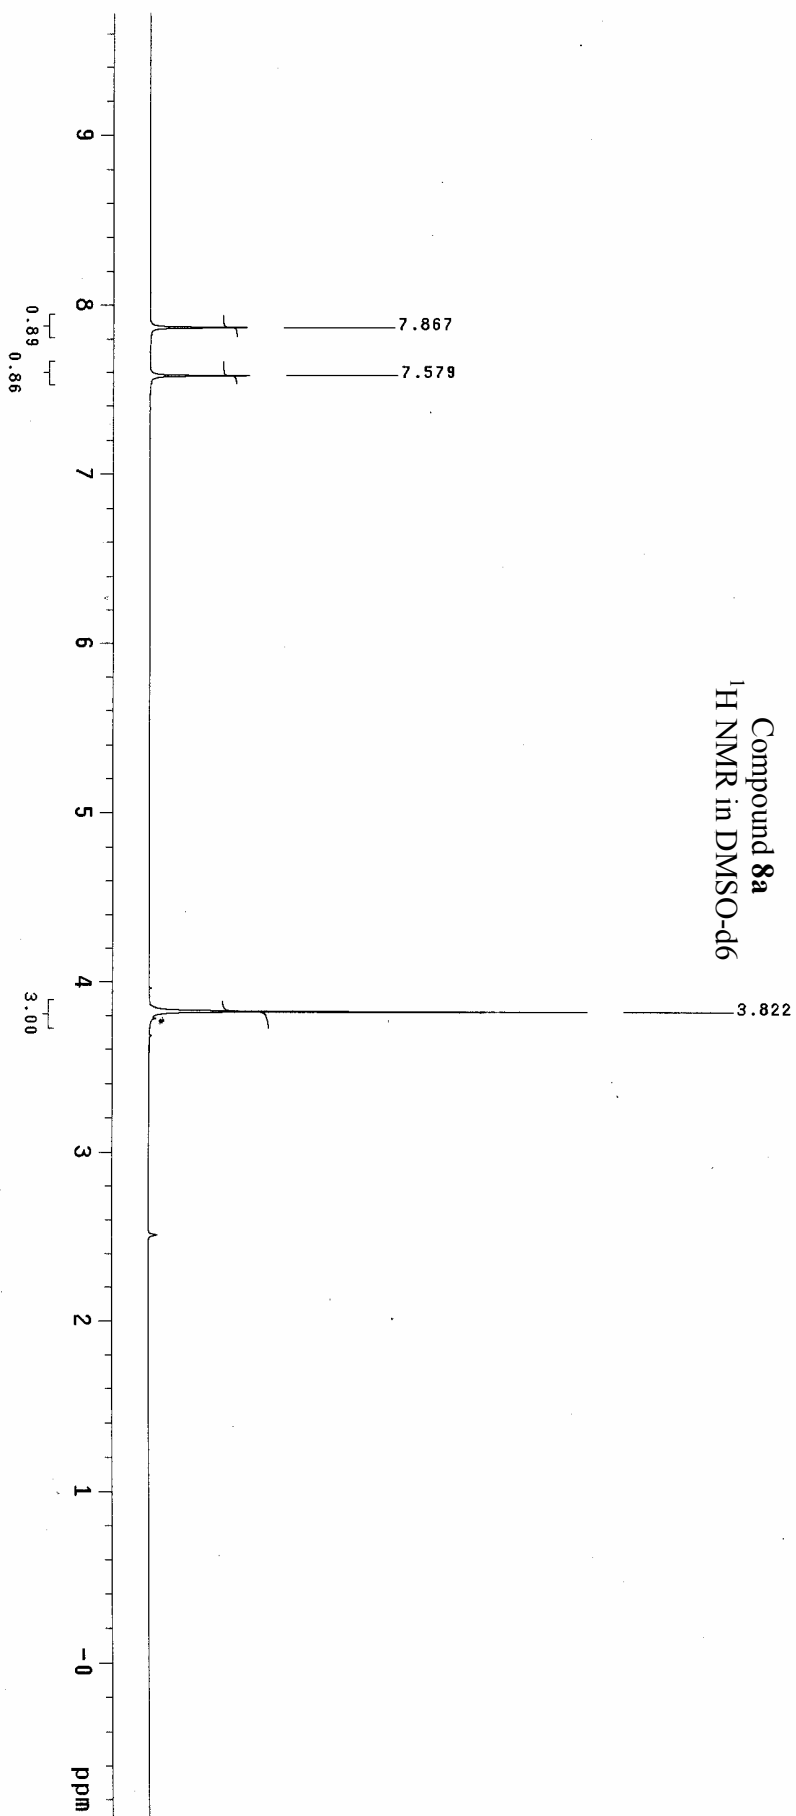

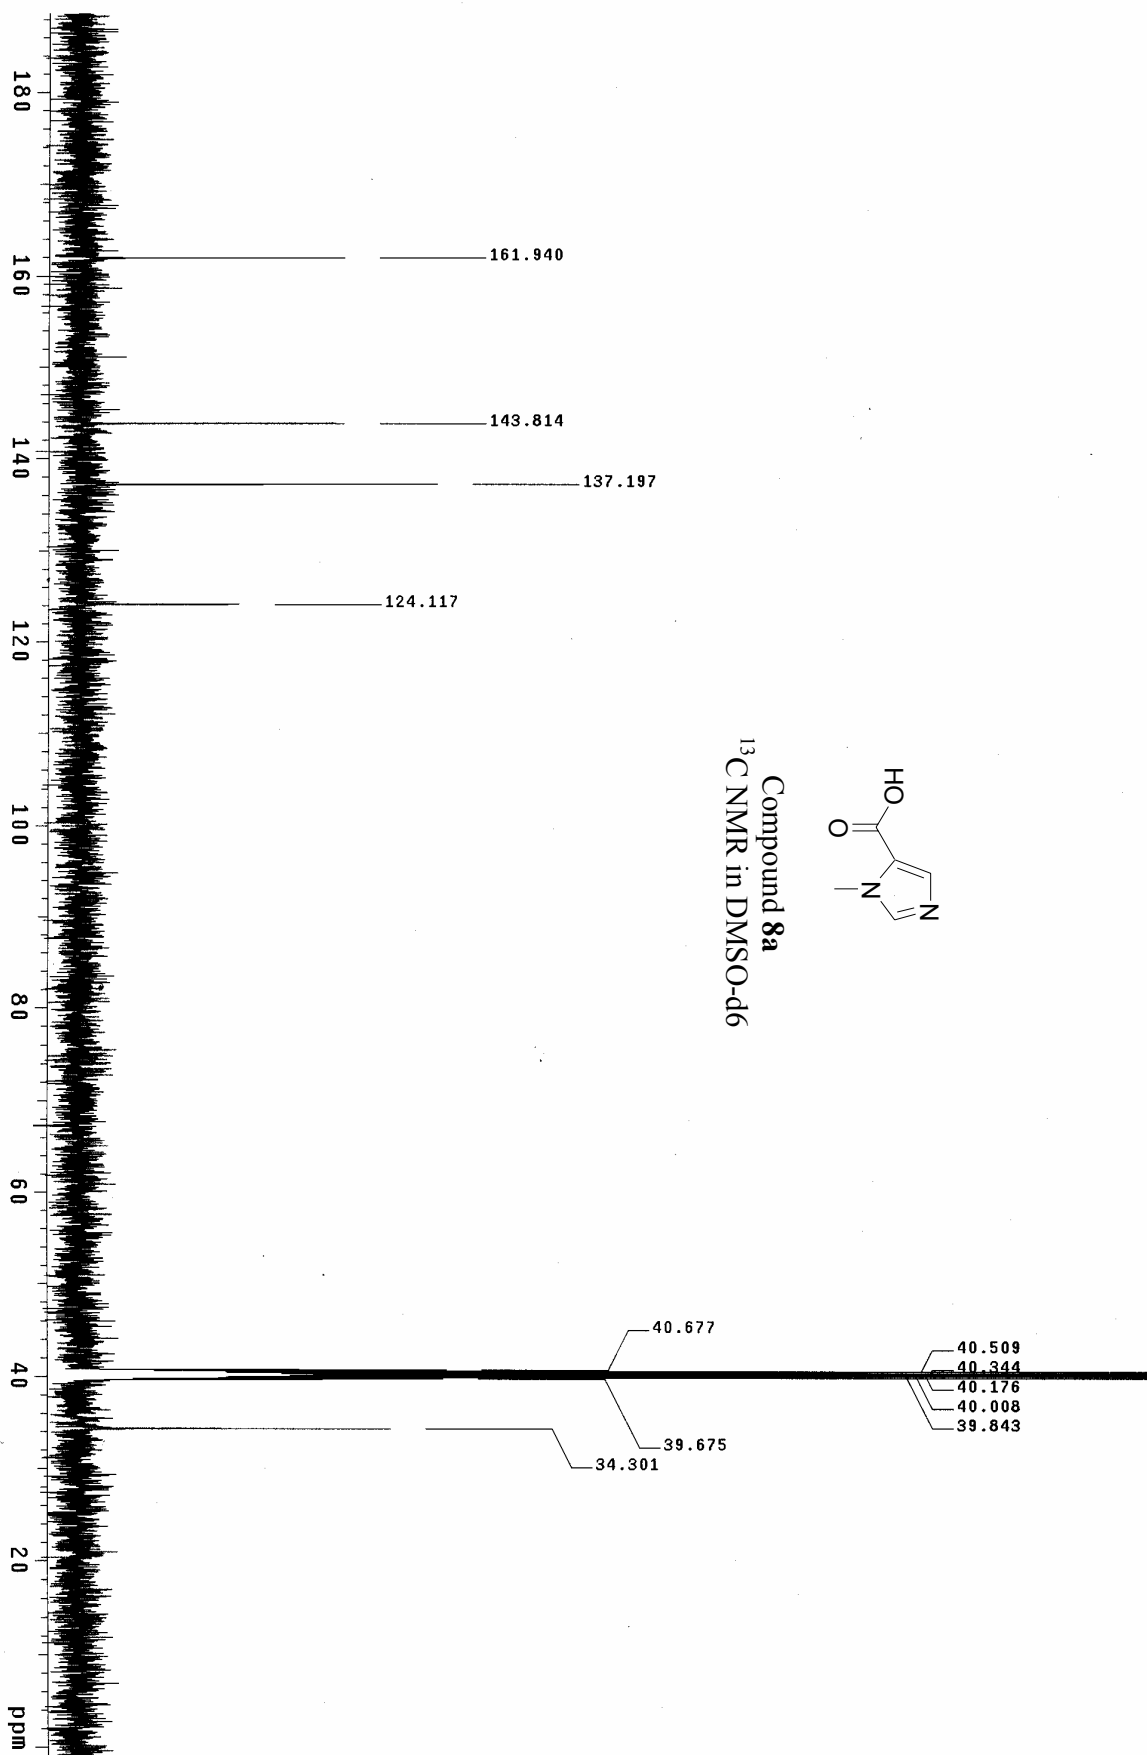

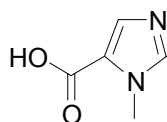

### Compound 8a, Low resolution mass analysis

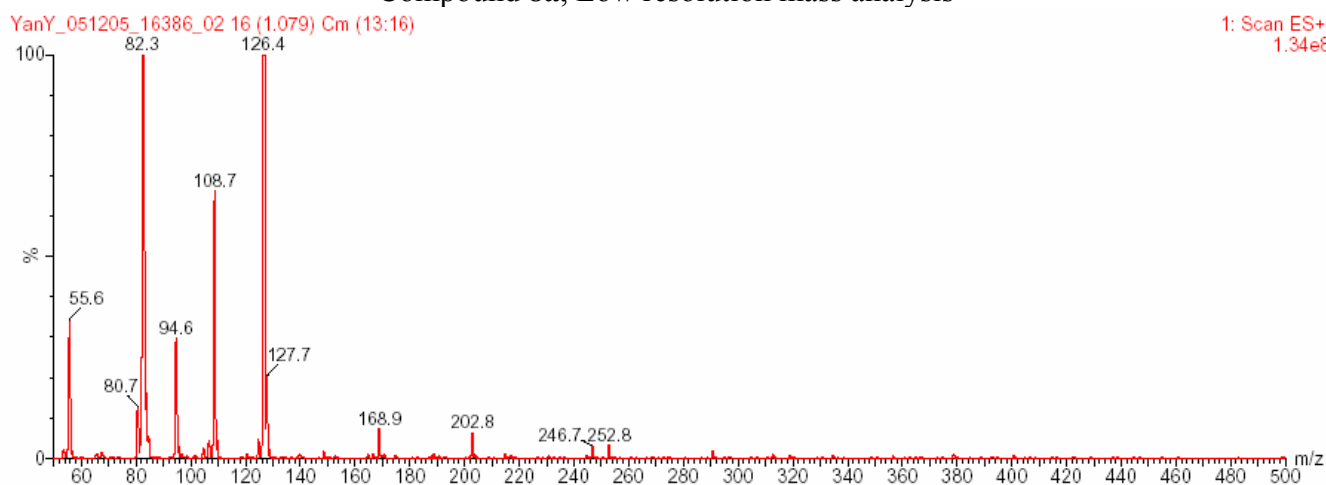

### Compound 8a, High resolution mass analysis

#### Elemental Composition Report

Page 1

#### Single Mass Analysis

Tolerance = 5.0 PPM / DBE: min = -1.5, max = 120.0

Isotope cluster parameters: Separation = 1.0 Abundance = 1.0%

Monoisotopic Mass, Odd and Even Electron Ions

126 formula(e) evaluated with 1 results within limits (up to 140 closest results for each mass)

Yilong Yan, Yan-5-23

Cone V = 10  
Coll V = 10.0

07-Dec-2005

YANYILONG\_051207\_16390\_YAN-5-23\_HRMS 36 (1.824) Cn (Cen,4, 80.00, Ar); Sm (SG, 2x3.00); Sb (2,20.00); Cm (3:39)

17:06:36

TOF MS ES+

5.20e3

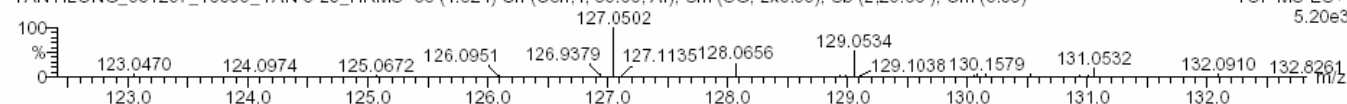

Minimum: -1.5  
Maximum: 200.0 5.0 120.0

| Mass     | Calc. Mass | mDa  | PPM  | DBE | Score | Formula                          |
|----------|------------|------|------|-----|-------|----------------------------------|
| 127.0502 | 127.0508   | -0.6 | -4.3 | 3.5 | 1     | C5 H7 N2 O2 ← [M+H] <sup>+</sup> |

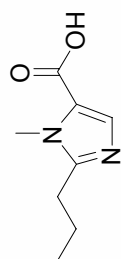

Compound **8b**  
<sup>1</sup>H NMR in DMSO-d<sub>6</sub>

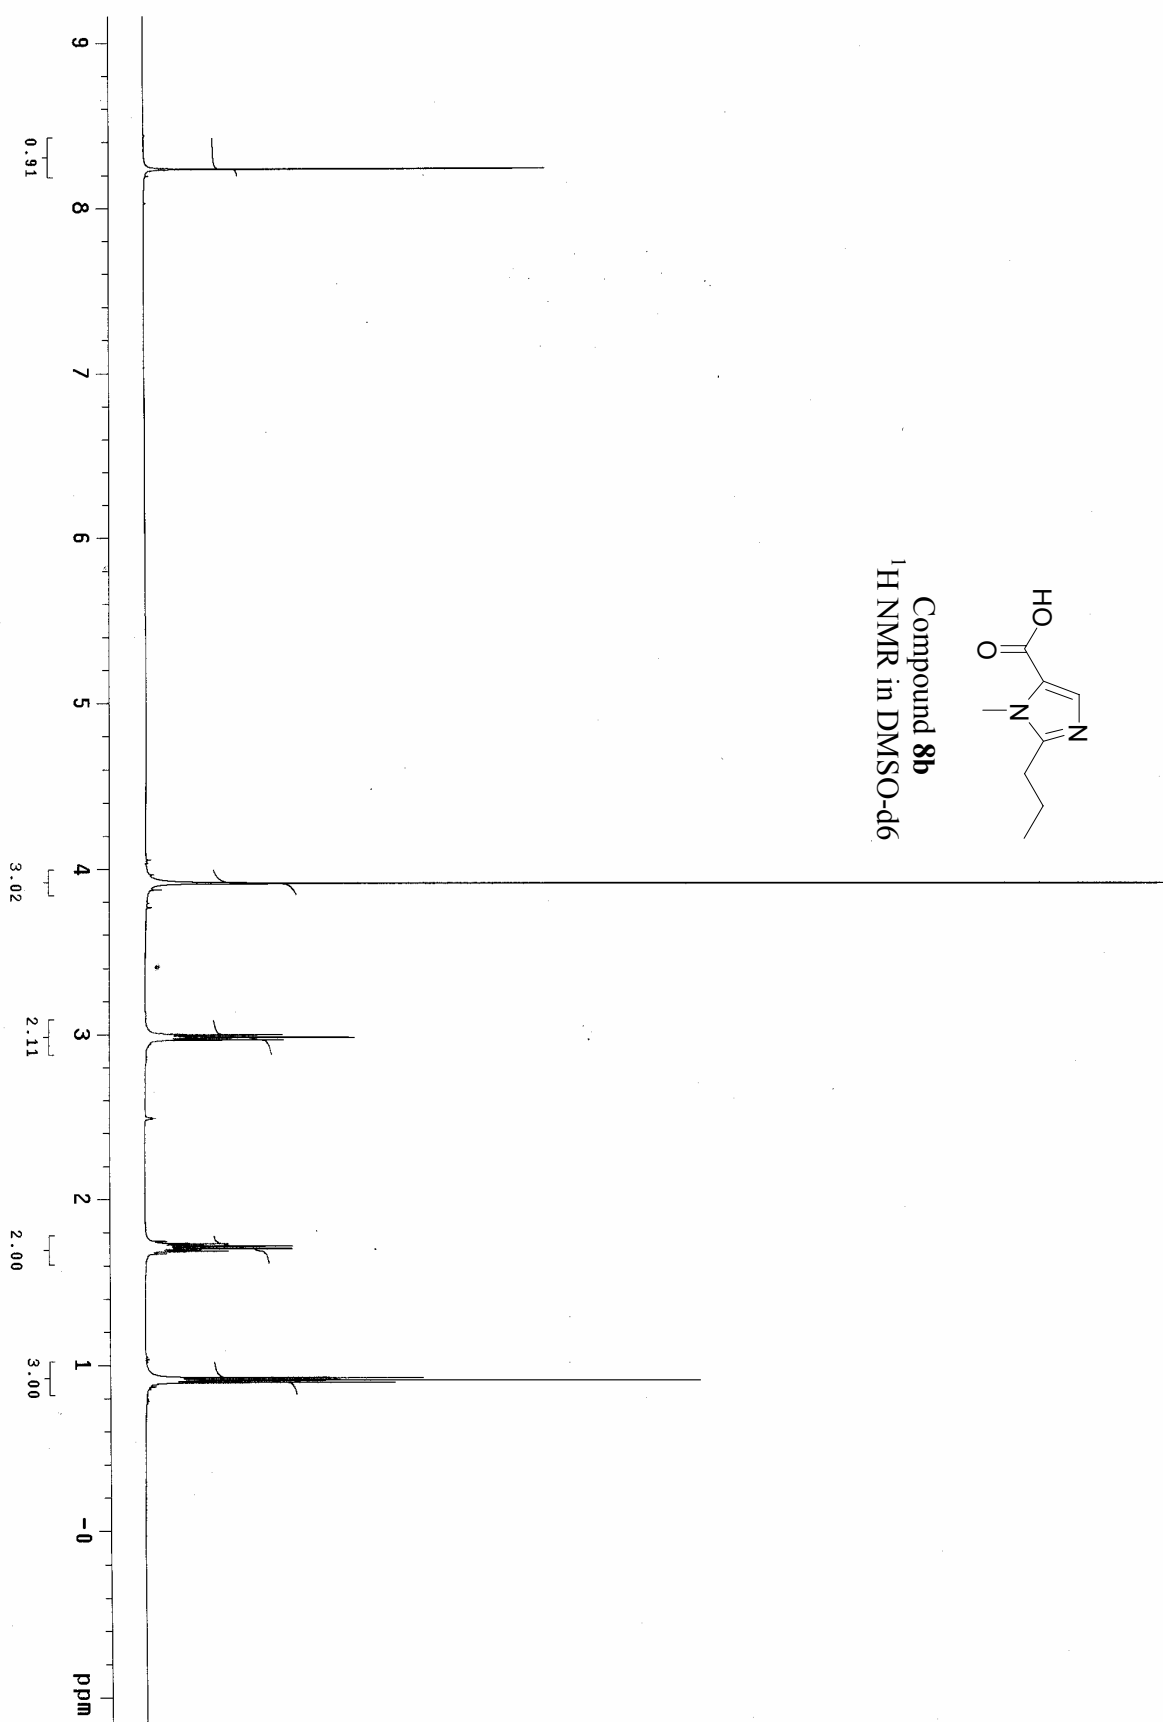

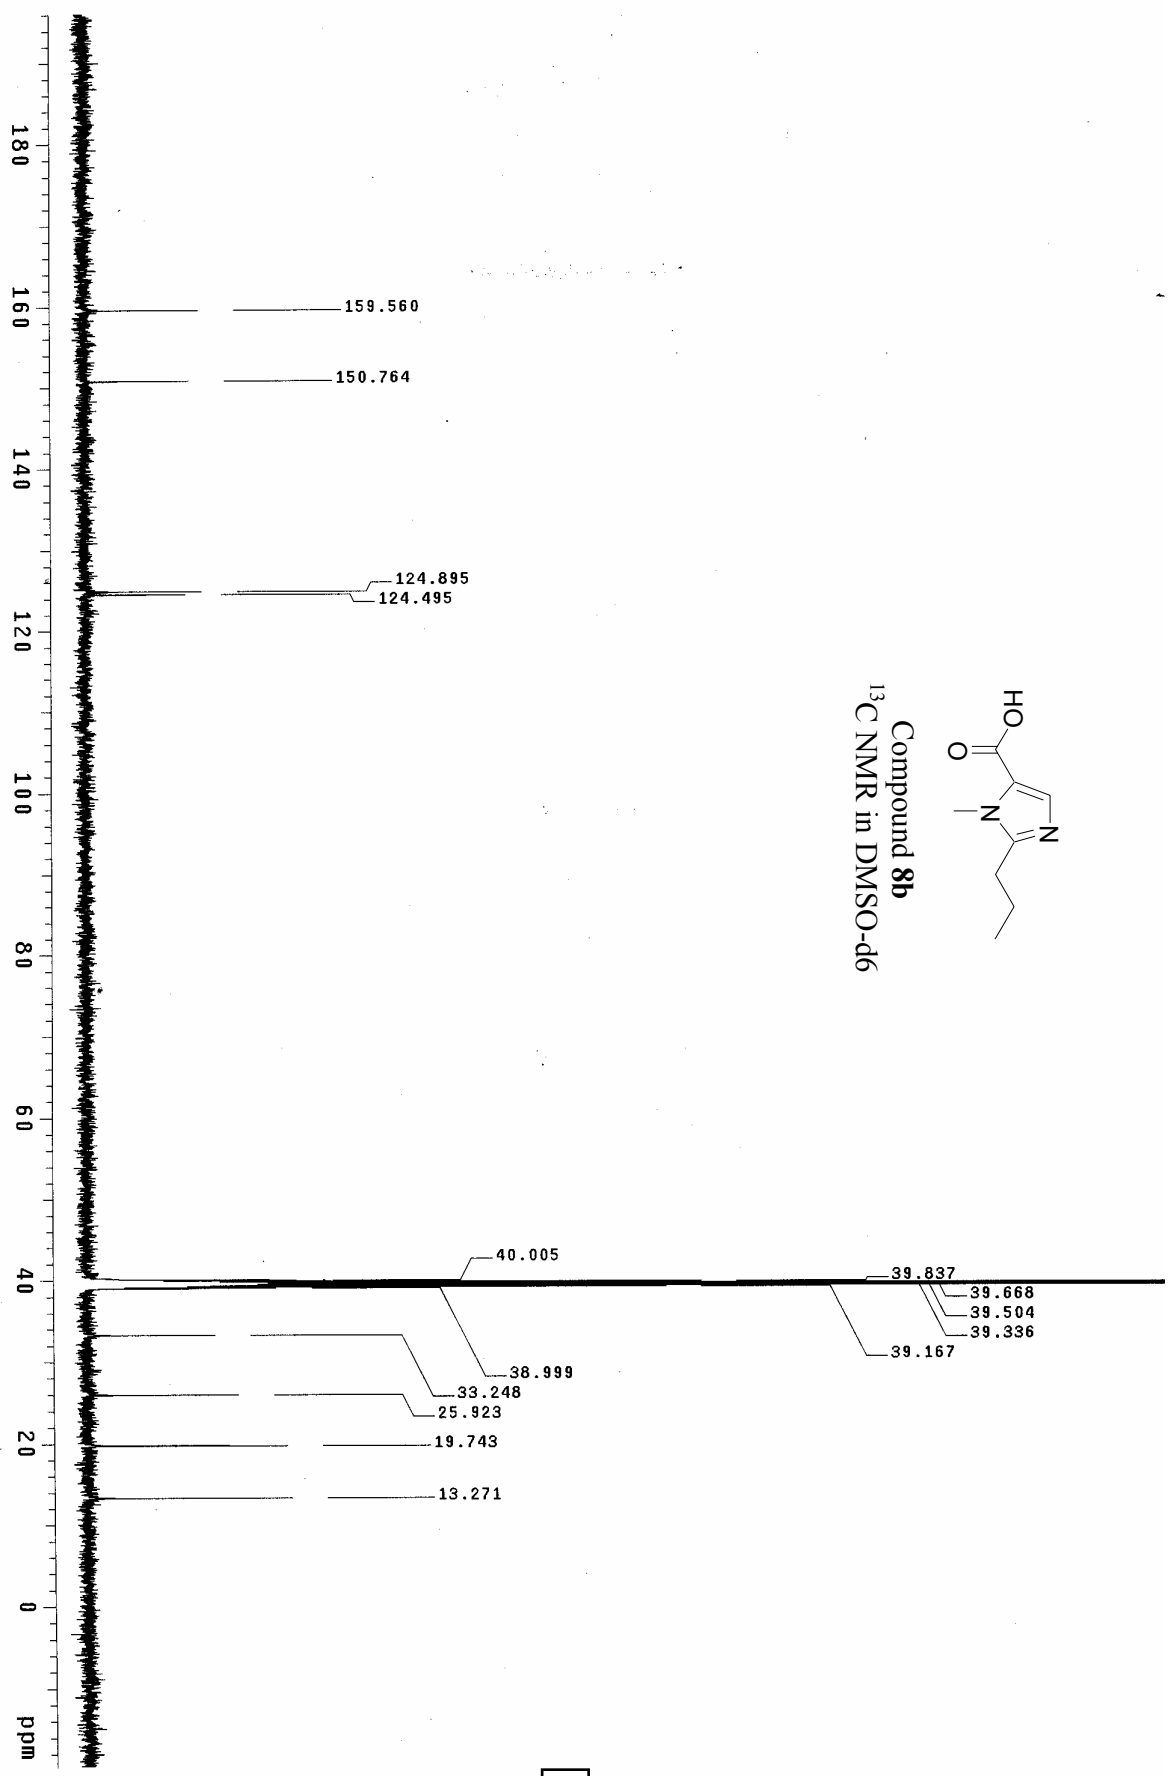

Compound 8b  
<sup>13</sup>C NMR in DMSO-d<sub>6</sub>

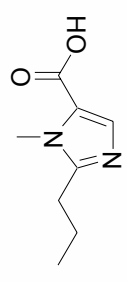

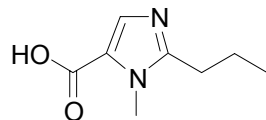

### Compound **8b**, Low resolution mass analysis

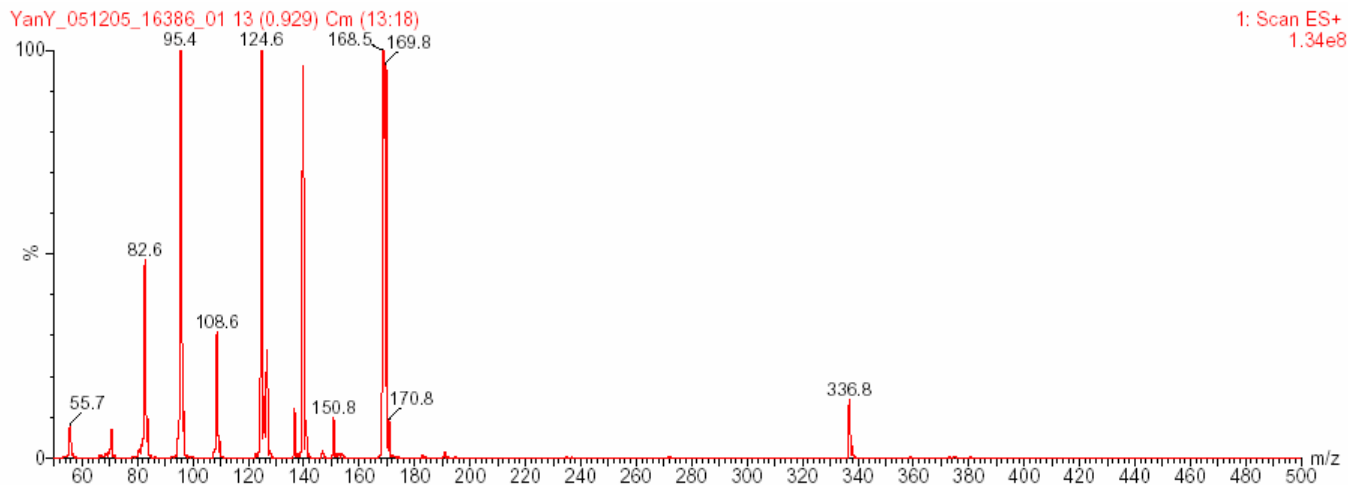

### Compound **8b**, High resolution mass analysis

#### Elemental Composition Report

Page 1

#### Single Mass Analysis

Tolerance = 5.0 PPM / DBE: min = -1.5, max = 120.0  
 Isotope cluster parameters: Separation = 1.0 Abundance = 1.0%

#### Monoisotopic Mass, Odd and Even Electron Ions

249 formula(e) evaluated with 1 results within limits (up to 140 closest results for each mass)

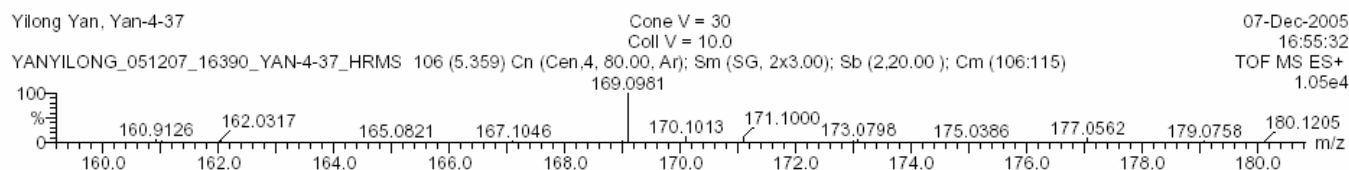

| Mass     | Calc. Mass | mDa | PPM | DBE | Score | Formula                  |
|----------|------------|-----|-----|-----|-------|--------------------------|
| 169.0981 | 169.0977   | 0.4 | 2.3 | 3.5 | 1     | C8 H13 N2 O2 ← $[M+H]^+$ |



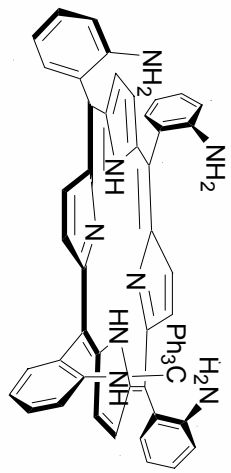

Compound 9  
<sup>1</sup>H NMR in CDCl<sub>3</sub>

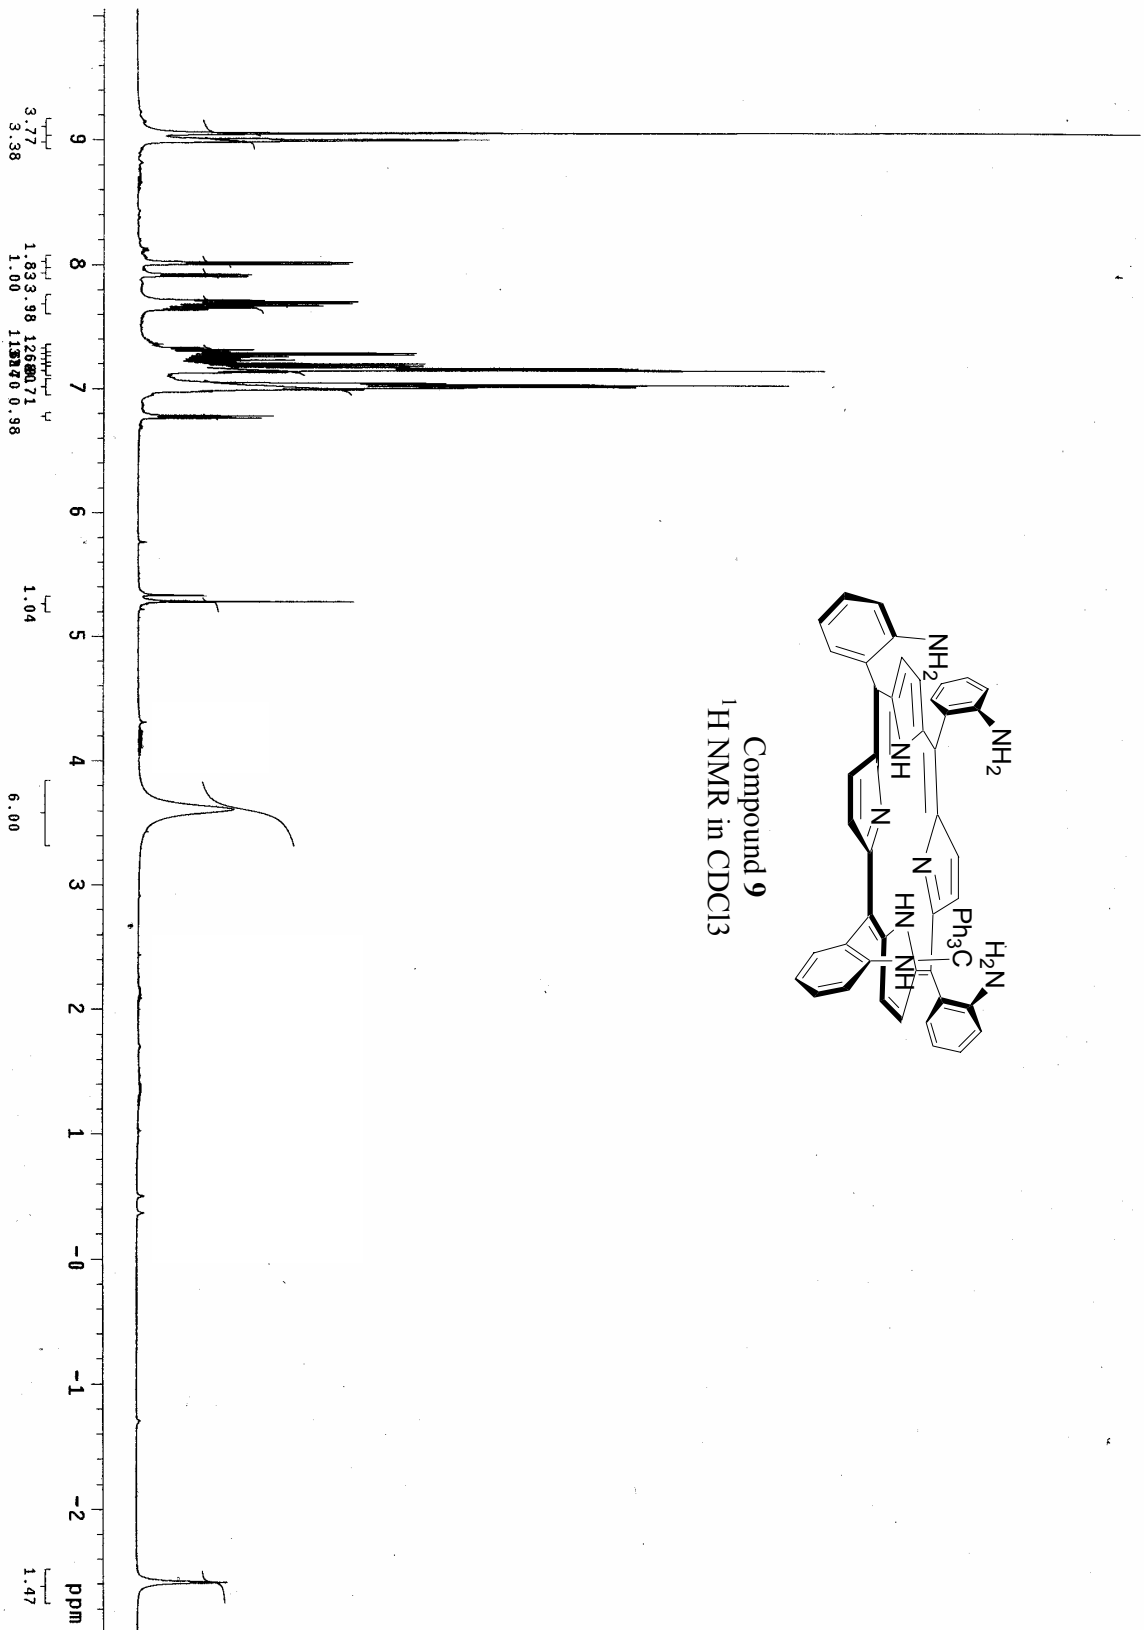



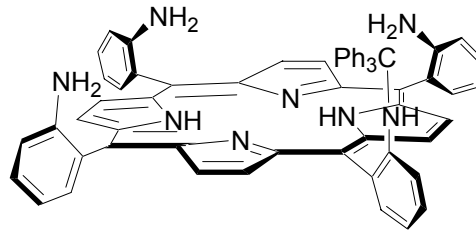

Compound 9, Low resolution mass analysis

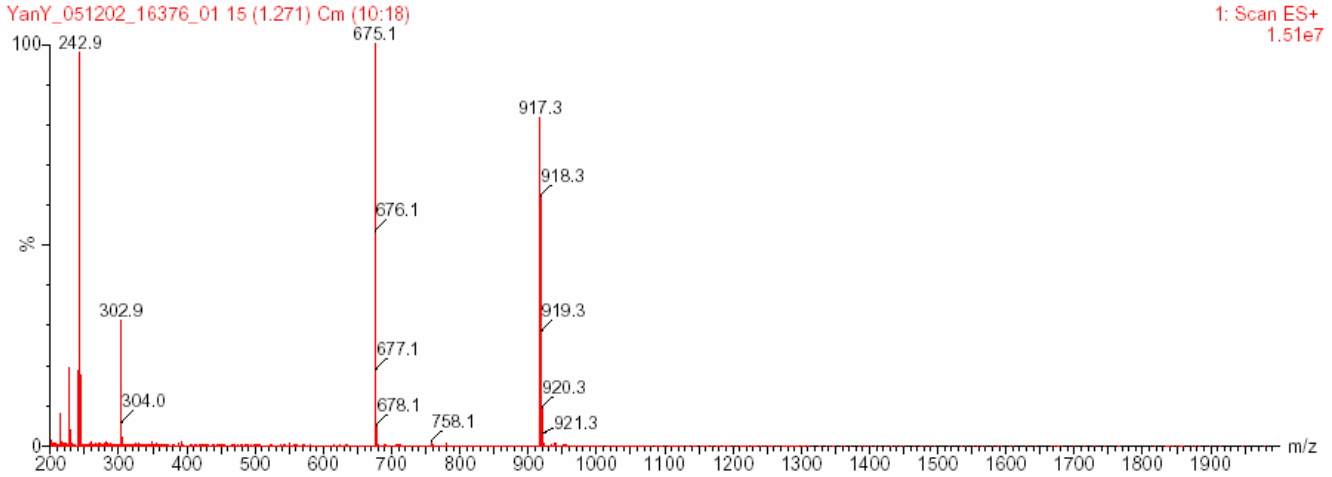

1: Scan ES+  
1.51e7

Compound 9, High resolution mass analysis

Elemental Composition Report

Page 1

Single Mass Analysis

Tolerance = 5.0 PPM / DBE: min = -1.5, max = 120.0

Isotope cluster parameters: Separation = 1.0 Abundance = 1.0%

Monoisotopic Mass, Odd and Even Electron Ions

2498 formula(e) evaluated with 25 results within limits (up to 140 closest results for each mass)

Yilong Yan, Yan-3-63

Cone V = 30  
Coll V = 10.0

05-Dec-2005  
16:43:18  
TOF MS ES+  
9.03e3

YANYILONG\_051205\_16381\_YAN-3-63\_HRMS 141 (5.970) Cn (Cen.4, 80.00, Ar); Sm (SG, 2x3.00); Sb (2.20.00); Cm (136:142)

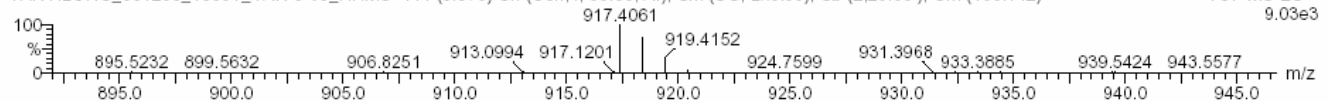

Minimum: -1.5  
Maximum: 200.0 5.0 120.0

| Mass     | Calc. Mass | mDa  | PPM  | DBE  | Score | Formula           |
|----------|------------|------|------|------|-------|-------------------|
| 917.4061 | 917.4056   | 0.5  | 0.5  | 35.0 | 7     | C62 H56 N O5 Na   |
|          | 917.4056   | 0.5  | 0.5  | 40.5 | 8     | C61 H50 N8 Na     |
|          | 917.4067   | -0.6 | -0.6 | 38.5 | 6     | C62 H53 N4 O4     |
|          | 917.4053   | 0.8  | 0.8  | 33.5 | 10    | C61 H57 O8        |
|          | 917.4053   | 0.8  | 0.8  | 39.0 | 9     | C60 H51 N7 O3     |
|          | 917.4070   | -0.9 | -0.9 | 40.0 | 5     | C63 H52 N5 O Na   |
|          | 917.4072   | -1.1 | -1.2 | 26.0 | 24    | C48 H55 N9 O10    |
|          | 917.4048   | 1.3  | 1.4  | 23.0 | 25    | C46 H56 N9 O10 Na |
|          | 917.4075   | -1.4 | -1.5 | 27.5 | 23    | C49 H54 N10 O7 Na |
|          | 917.4043   | 1.8  | 2.0  | 35.5 | 11    | C60 H54 N4 O4 Na  |
|          | 917.4080   | -1.9 | -2.1 | 43.5 | 4     | C63 H49 N8        |
|          | 917.4080   | -1.9 | -2.1 | 38.0 | 1     | C64 H55 N O5      |
|          | 917.4040   | 2.1  | 2.3  | 34.0 | 14    | C59 H55 N3 O7     |
|          | 917.4040   | 2.1  | 2.3  | 39.5 | 12    | C58 H49 N10 O2    |
|          | 917.4083   | -2.2 | -2.4 | 39.5 | 2     | C65 H54 N2 O2 Na  |
|          | 917.4088   | -2.7 | -3.0 | 27.0 | 22    | C51 H56 N7 O8 Na  |
|          | 917.4029   | 3.2  | 3.4  | 30.5 | 16    | C59 H58 O8 Na     |
|          | 917.4029   | 3.2  | 3.5  | 36.0 | 15    | C58 H52 N7 O3 Na  |
|          | 917.4094   | -3.3 | -3.6 | 43.0 | 3     | C65 H51 N5 O      |
|          | 917.4027   | 3.4  | 3.8  | 34.5 | 17    | C57 H53 N6 O6     |
|          | 917.4099   | -3.8 | -4.1 | 30.5 | 21    | C51 H53 N10 O7    |
|          | 917.4022   | 3.9  | 4.3  | 47.0 | 13    | C71 H51 N         |
|          | 917.4101   | -4.0 | -4.4 | 26.5 | 20    | C53 H58 N4 O9 Na  |
|          | 917.4016   | 4.5  | 4.9  | 31.0 | 19    | C57 H56 N3 O7 Na  |
|          | 917.4016   | 4.5  | 4.9  | 36.5 | 18    | C56 H50 N10 O2 Na |

← [M+H]<sup>+</sup>

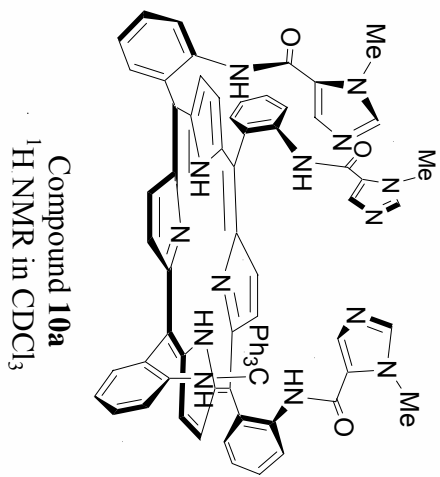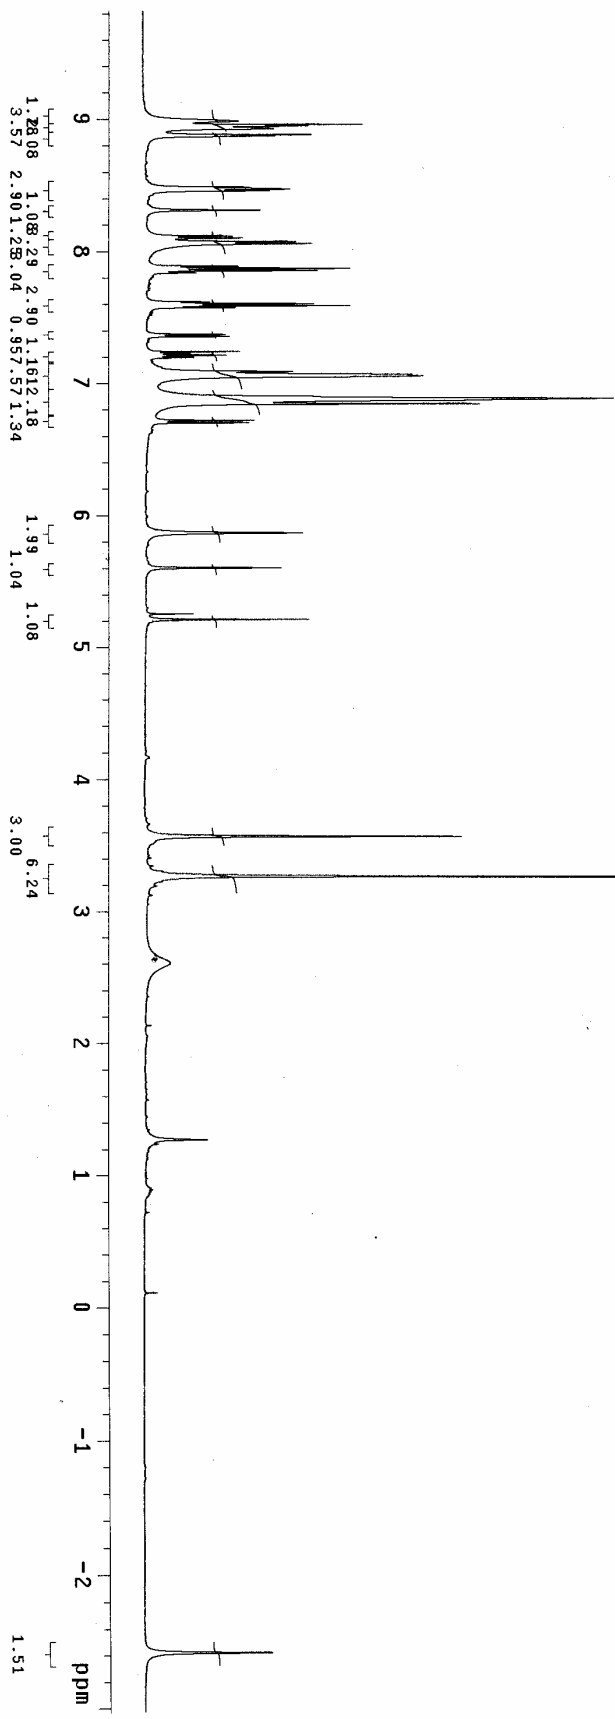

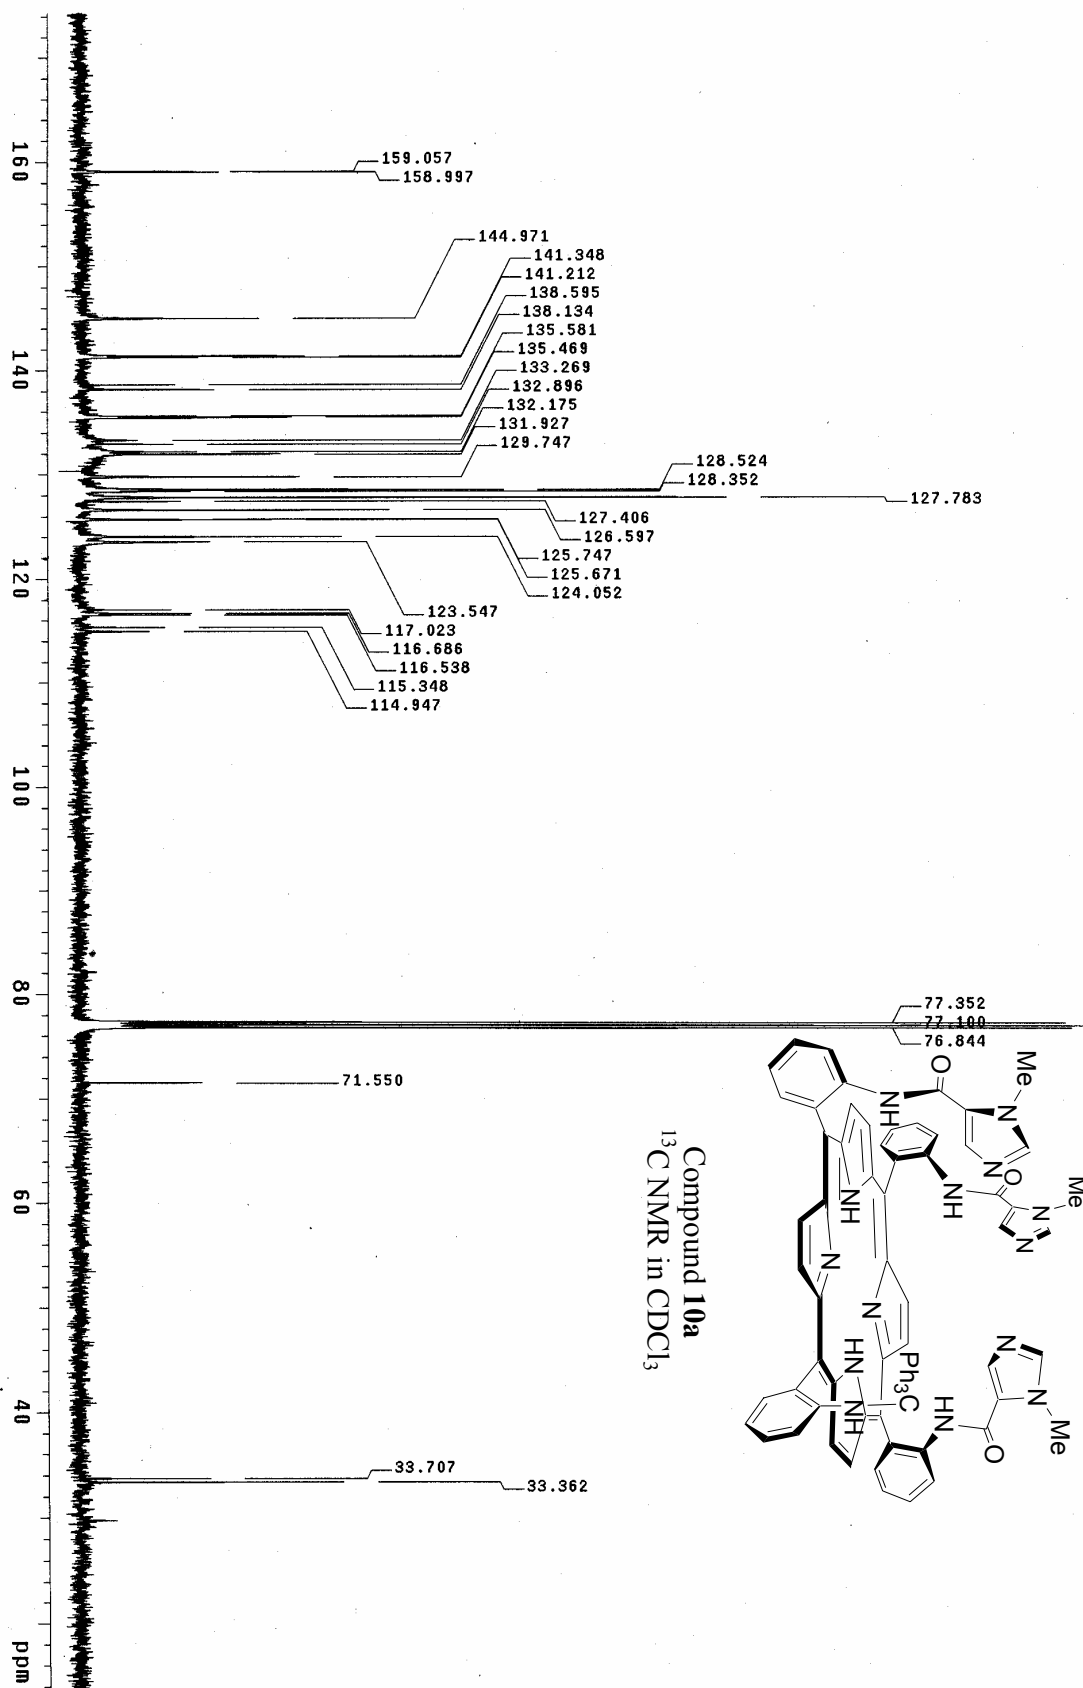

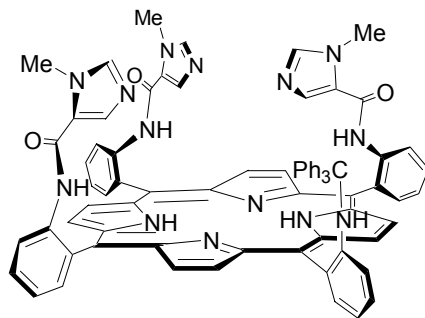

Compound 10a, Low resolution mass analysis

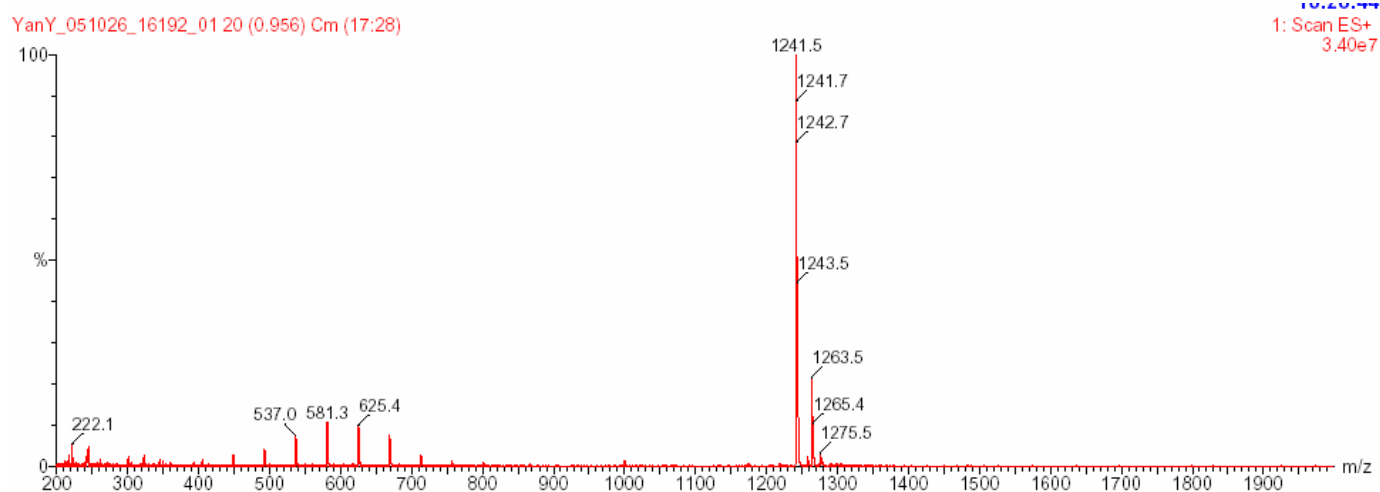

Yan-4-26

26-Oct-2005

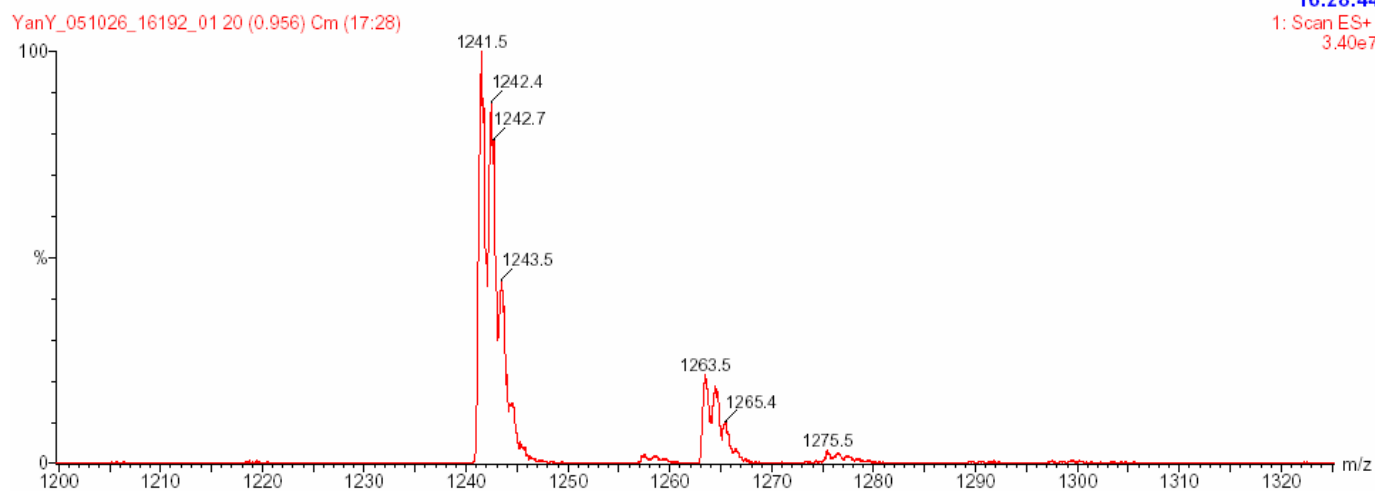

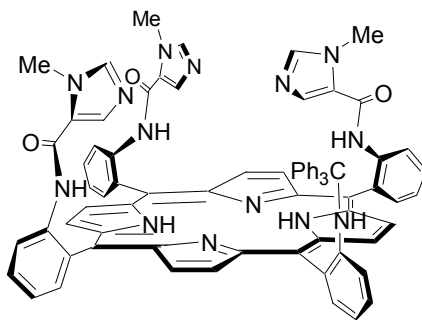

## Compound 10a, High resolution mass analysis

### Elemental Composition Report

Page 1

### Single Mass Analysis

Tolerance = 5.0 PPM / DBE: min = -1.5, max = 120.0

Isotope cluster parameters: Separation = 1.0 Abundance = 1.0%

Monoisotopic Mass, Odd and Even Electron Ions

4929 formula(e) evaluated with 48 results within limits (up to 140 closest results for each mass)

Yilong Yan, Yan-4-26

Cone V = 30  
Coll V = 10.0

05-Dec-2005

17:29:47

YANYILONG\_051205\_16381\_YAN-4-26\_HRMS 25 (1.064) Cn (Cen.4, 80.00, Ar); Sm (SG, 2x3.00); Sb (2.20.00); Cm (22:28)

TOF MS ES+

2.01e4

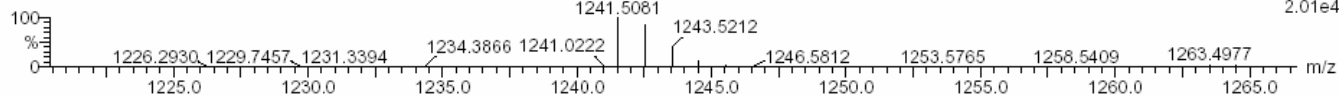

Minimum: -1.5  
Maximum: 200.0 5.0 120.0

| Mass      | Calc. Mass | mDa  | PPM  | DBE  | Score | Formula           |
|-----------|------------|------|------|------|-------|-------------------|
| 1241.5081 | 1241.5081  | 0.0  | 0.0  | 50.5 | 28    | C84 H70 N2 O7 Na  |
|           | 1241.5081  | 0.0  | 0.0  | 56.0 | 30    | C83 H64 N9 O2 Na  |
|           | 1241.5078  | 0.3  | 0.2  | 49.0 | 25    | C83 H71 N O10     |
|           | 1241.5078  | 0.3  | 0.2  | 54.5 | 27    | C82 H65 N8 O5     |
|           | 1241.5078  | 0.3  | 0.3  | 60.0 | 29    | C81 H59 N15       |
|           | 1241.5086  | -0.5 | -0.4 | 43.5 | 11    | C69 H66 N14 O8 Na |
|           | 1241.5086  | -0.5 | -0.4 | 66.5 | 48    | C98 H65           |
|           | 1241.5091  | -1.0 | -0.8 | 59.5 | 32    | C83 H61 N12 O     |
|           | 1241.5091  | -1.0 | -0.8 | 54.0 | 31    | C84 H67 N5 O6     |
|           | 1241.5094  | -1.3 | -1.1 | 55.5 | 33    | C85 H66 N6 O3 Na  |
|           | 1241.5067  | 1.4  | 1.1  | 51.0 | 24    | C82 H68 N5 O6 Na  |
|           | 1241.5067  | 1.4  | 1.1  | 56.5 | 26    | C81 H62 N12 O Na  |
|           | 1241.5065  | 1.6  | 1.3  | 49.5 | 21    | C81 H69 N4 O9     |
|           | 1241.5065  | 1.6  | 1.3  | 55.0 | 23    | C80 H63 N11 O4    |
|           | 1241.5099  | -1.8 | -1.5 | 43.0 | 6     | C71 H68 N11 O9 Na |
|           | 1241.5062  | 1.9  | 1.5  | 63.5 | 47    | C96 H66 Na        |
|           | 1241.5105  | -2.4 | -1.9 | 59.0 | 35    | C85 H63 N9 O2     |
|           | 1241.5105  | -2.4 | -1.9 | 53.5 | 34    | C86 H69 N2 O7     |
|           | 1241.5108  | -2.7 | -2.1 | 55.0 | 36    | C87 H68 N3 O4 Na  |
|           | 1241.5054  | 2.7  | 2.2  | 46.0 | 18    | C81 H72 N O10 Na  |
|           | 1241.5054  | 2.7  | 2.2  | 51.5 | 20    | C80 H66 N8 O5 Na  |
|           | 1241.5054  | 2.7  | 2.2  | 57.0 | 22    | C79 H60 N15 Na    |
|           | 1241.5110  | -2.9 | -2.3 | 46.5 | 3     | C71 H65 N14 O8    |
|           | 1241.5051  | 3.0  | 2.4  | 50.0 | 17    | C79 H67 N7 O8     |
|           | 1241.5051  | 3.0  | 2.4  | 55.5 | 19    | C78 H61 N14 O3    |
|           | 1241.5113  | -3.2 | -2.5 | 48.0 | 4     | C72 H64 N15 O5 Na |
|           | 1241.5113  | -3.2 | -2.5 | 42.5 | 1     | C73 H70 N8 O10 Na |
|           | 1241.5046  | 3.5  | 2.8  | 62.5 | 46    | C93 H65 N2 O2     |
|           | 1241.5118  | -3.7 | -3.0 | 58.5 | 37    | C87 H65 N6 O3     |
|           | 1241.5121  | -4.0 | -3.2 | 60.0 | 39    | C88 H64 N7 Na     |
|           | 1241.5121  | -4.0 | -3.2 | 54.5 | 38    | C89 H70 O5 Na     |
|           | 1241.5041  | 4.0  | 3.3  | 46.5 | 15    | C79 H70 N4 O9 Na  |
|           | 1241.5040  | 4.1  | 3.3  | 52.0 | 16    | C78 H64 N11 O4 Na |
|           | 1241.5123  | -4.2 | -3.4 | 46.0 | 2     | C73 H67 N11 O9    |
|           | 1241.5038  | 4.3  | 3.5  | 50.5 | 14    | C77 H65 N10 O7    |
|           | 1241.5126  | -4.5 | -3.6 | 47.5 | 7     | C74 H66 N12 O6 Na |
|           | 1241.5033  | 4.8  | 3.9  | 63.0 | 45    | C91 H63 N5 O      |
|           | 1241.5132  | -5.1 | -4.1 | 58.0 | 40    | C89 H67 N3 O4     |
|           | 1241.5134  | -5.3 | -4.3 | 59.5 | 42    | C90 H66 N4 O Na   |
|           | 1241.5027  | 5.4  | 4.3  | 47.0 | 12    | C77 H68 N7 O8 Na  |
|           | 1241.5027  | 5.4  | 4.3  | 52.5 | 13    | C76 H62 N14 O3 Na |
|           | 1241.5137  | -5.6 | -4.5 | 51.0 | 8     | C74 H63 N15 O5    |
|           | 1241.5137  | -5.6 | -4.5 | 45.5 | 5     | C75 H69 N8 O10    |
|           | 1241.5024  | 5.7  | 4.6  | 51.0 | 10    | C75 H63 N13 O6    |
|           | 1241.5139  | -5.8 | -4.7 | 47.0 | 9     | C76 H68 N9 O7 Na  |
|           | 1241.5022  | 5.9  | 4.8  | 59.5 | 44    | C91 H66 N2 O2 Na  |
|           | 1241.5019  | 6.2  | 5.0  | 58.0 | 41    | C90 H67 N O5      |
|           | 1241.5019  | 6.2  | 5.0  | 63.5 | 43    | C89 H61 N8        |

[M+H]<sup>+</sup>

Compound 10b  
<sup>1</sup>H NMR in CDCl<sub>3</sub>

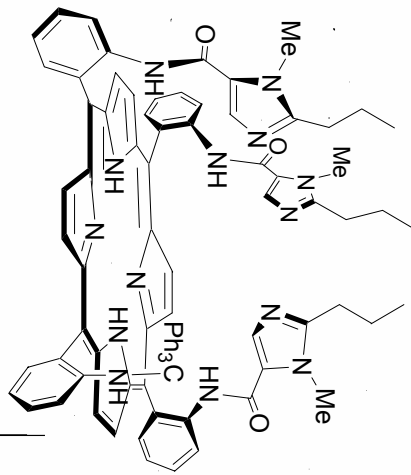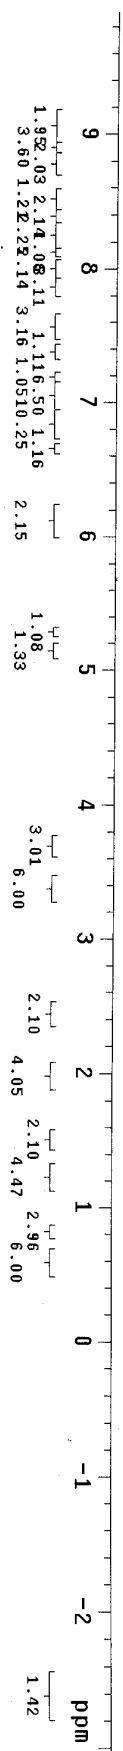



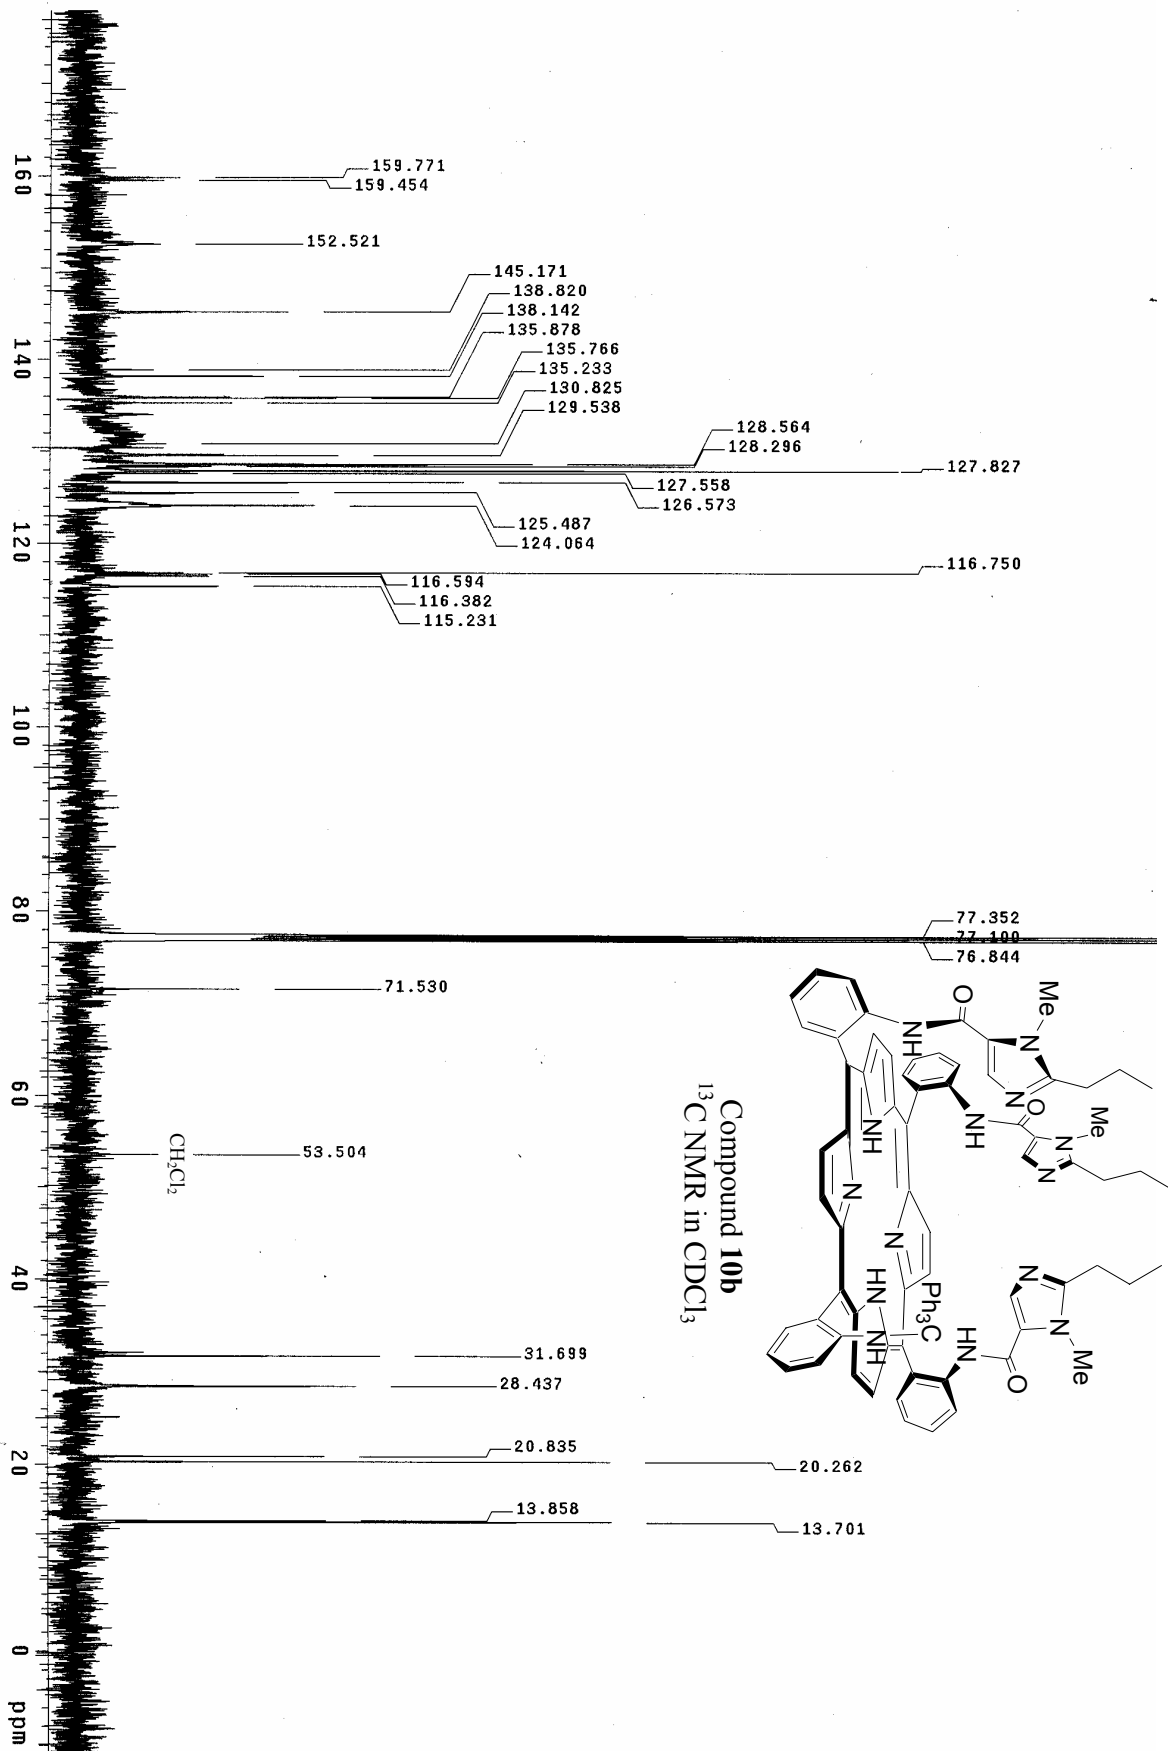

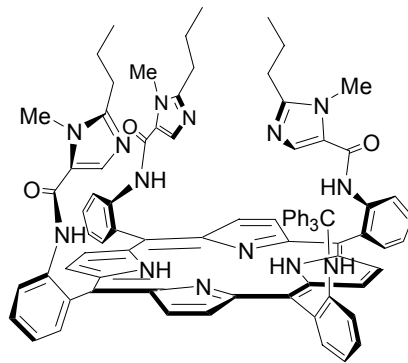

Compound **10b**, Low resolution mass analysis

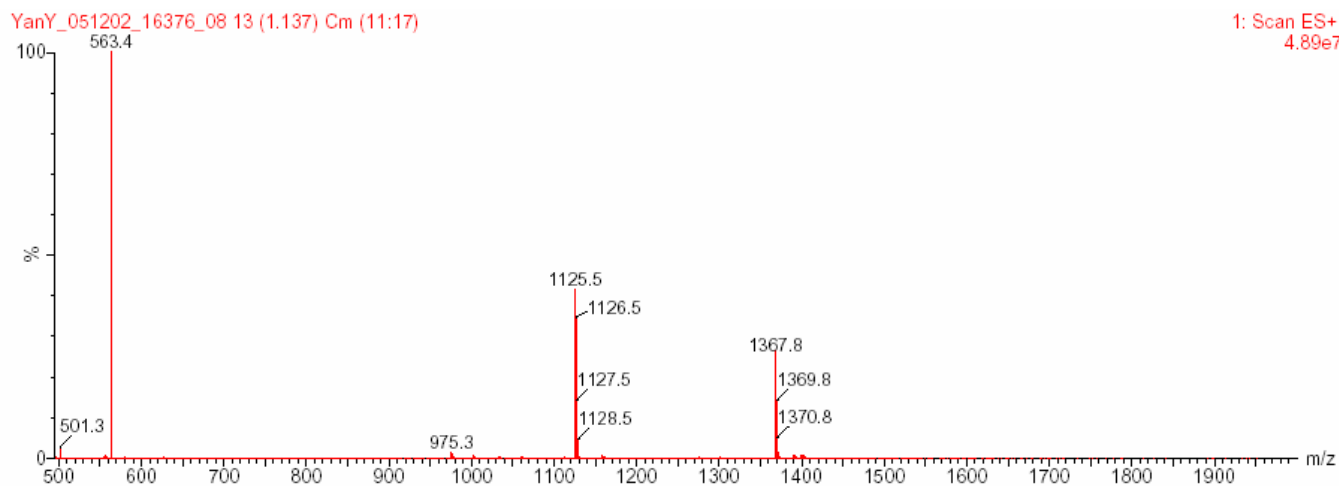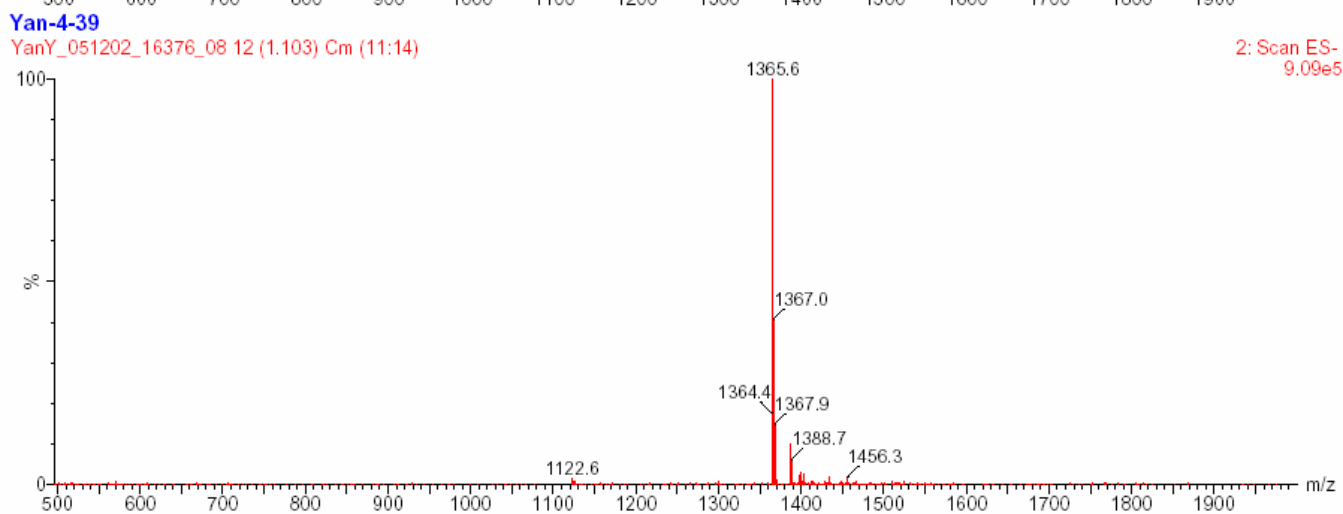

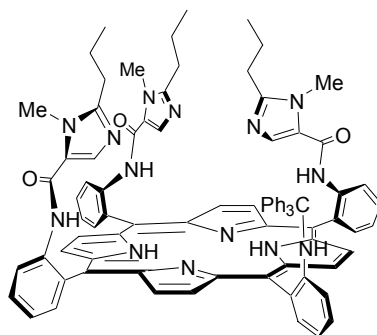

## Compound 10b, High resolution mass analysis

### Elemental Composition Report

Page 1

### Single Mass Analysis

Tolerance = 5.0 PPM / DBE: min = -1.5, max = 120.0

Isotope cluster parameters: Separation = 1.0 Abundance = 1.0%

Monoisotopic Mass, Odd and Even Electron Ions

4885 formula(e) evaluated with 50 results within limits (up to 140 closest results for each mass)

Yilong Yan, Yan-4-39

Cone V = 30  
Coll V = 10.0

05-Dec-2005  
17:18:44  
TOF MS ES+  
2.01e4

YANYILONG\_051205\_16381\_YAN-4-39\_HRMS 6 (0.261) Cn (Cen.4, 80.00, Ar); Sm (SG, 2x3.00); Sb (2,20.00); Cm (6:9)

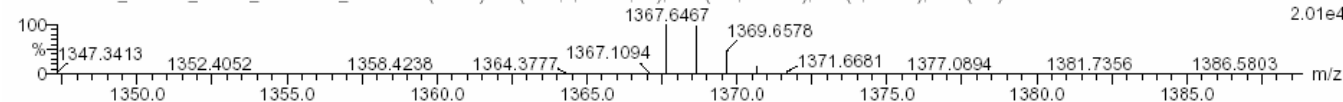

Minimum: -1.5  
Maximum: 200.0 5.0 120.0

| Mass      | Calc. Mass | mDa  | PPM  | DBE  | Score | Formula           |
|-----------|------------|------|------|------|-------|-------------------|
| 1367.6467 | 1367.6462  | 0.5  | 0.3  | 46.0 | 20    | C90 H90 N O10 Na  |
|           | 1367.6462  | 0.5  | 0.3  | 51.5 | 21    | C89 H84 N8 O5 Na  |
|           | 1367.6462  | 0.5  | 0.3  | 57.0 | 22    | C88 H78 N15 Na    |
|           | 1367.6473  | -0.6 | -0.4 | 55.0 | 24    | C89 H81 N11 O4    |
|           | 1367.6473  | -0.6 | -0.4 | 49.5 | 23    | C90 H87 N4 O9     |
|           | 1367.6460  | 0.7  | 0.5  | 50.0 | 18    | C88 H85 N7 O8     |
|           | 1367.6460  | 0.7  | 0.5  | 55.5 | 19    | C87 H79 N14 O3    |
|           | 1367.6476  | -0.9 | -0.6 | 56.5 | 26    | C90 H80 N12 O Na  |
|           | 1367.6476  | -0.9 | -0.6 | 51.0 | 25    | C91 H86 N5 O6 Na  |
|           | 1367.6449  | 1.8  | 1.3  | 46.5 | 16    | C88 H88 N4 O9 Na  |
|           | 1367.6449  | 1.8  | 1.3  | 52.0 | 17    | C87 H82 N11 O4 Na |
|           | 1367.6486  | -1.9 | -1.4 | 60.0 | 29    | C90 H77 N15       |
|           | 1367.6486  | -1.9 | -1.4 | 54.5 | 28    | C91 H83 N8 O5     |
|           | 1367.6486  | -1.9 | -1.4 | 49.0 | 27    | C92 H89 N O10     |
|           | 1367.6446  | 2.1  | 1.5  | 50.5 | 15    | C86 H83 N10 O7    |
|           | 1367.6489  | -2.2 | -1.6 | 56.0 | 31    | C92 H82 N9 O2 Na  |
|           | 1367.6489  | -2.2 | -1.6 | 50.5 | 30    | C93 H88 N2 O7 Na  |
|           | 1367.6441  | 2.6  | 1.9  | 63.0 | 50    | C100 H81 N5 O     |
|           | 1367.6494  | -2.7 | -2.0 | 43.5 | 7     | C78 H84 N14 O8 Na |
|           | 1367.6436  | 3.1  | 2.3  | 47.0 | 13    | C86 H86 N7 O8 Na  |
|           | 1367.6436  | 3.1  | 2.3  | 52.5 | 14    | C85 H80 N14 O3 Na |
|           | 1367.6500  | -3.3 | -2.4 | 59.5 | 33    | C92 H79 N12 O     |
|           | 1367.6500  | -3.3 | -2.4 | 54.0 | 32    | C93 H85 N5 O6     |
|           | 1367.6433  | 3.4  | 2.5  | 51.0 | 12    | C84 H81 N13 O6    |
|           | 1367.6503  | -3.6 | -2.6 | 55.5 | 34    | C94 H84 N6 O3 Na  |
|           | 1367.6431  | 3.6  | 2.7  | 59.5 | 49    | C100 H84 N2 O2 Na |
|           | 1367.6428  | 3.9  | 2.9  | 58.0 | 47    | C99 H85 N O5      |
|           | 1367.6428  | 3.9  | 2.9  | 63.5 | 48    | C98 H79 N8        |
|           | 1367.6508  | -4.1 | -3.0 | 43.0 | 2     | C80 H86 N11 O9 Na |
|           | 1367.6422  | 4.5  | 3.3  | 47.5 | 11    | C84 H84 N10 O7 Na |
|           | 1367.6513  | -4.6 | -3.4 | 59.0 | 36    | C94 H81 N9 O2     |
|           | 1367.6513  | -4.6 | -3.4 | 53.5 | 35    | C95 H87 N2 O7     |
|           | 1367.6419  | 4.8  | 3.5  | 46.0 | 10    | C83 H85 N9 O10    |
|           | 1367.6516  | -4.9 | -3.6 | 55.0 | 38    | C96 H86 N3 O4 Na  |
|           | 1367.6417  | 5.0  | 3.7  | 60.0 | 46    | C98 H82 N5 O Na   |
|           | 1367.6518  | -5.1 | -3.8 | 46.5 | 1     | C80 H83 N14 O8    |
|           | 1367.6414  | 5.3  | 3.9  | 58.5 | 44    | C97 H83 N4 O4     |
|           | 1367.6521  | -5.4 | -4.0 | 48.0 | 3     | C81 H82 N15 O5 Na |
|           | 1367.6521  | -5.4 | -4.0 | 42.5 | 5     | C82 H88 N8 O10 Na |
|           | 1367.6409  | 5.8  | 4.3  | 48.0 | 6     | C82 H82 N13 O6 Na |
|           | 1367.6527  | -6.0 | -4.4 | 58.5 | 41    | C96 H83 N6 O3     |
|           | 1367.6406  | 6.1  | 4.5  | 46.5 | 4     | C81 H83 N12 O9    |
|           | 1367.6529  | -6.2 | -4.6 | 60.0 | 45    | C97 H82 N7 Na     |
|           | 1367.6529  | -6.2 | -4.6 | 54.5 | 43    | C98 H88 O5 Na     |
|           | 1367.6404  | 6.3  | 4.6  | 55.0 | 40    | C97 H86 N O5 Na   |
|           | 1367.6404  | 6.3  | 4.6  | 60.5 | 42    | C96 H80 N8 Na     |
|           | 1367.6532  | -6.5 | -4.7 | 46.0 | 8     | C82 H85 N11 O9    |
|           | 1367.6401  | 6.6  | 4.8  | 53.5 | 37    | C96 H87 O8        |
|           | 1367.6401  | 6.6  | 4.8  | 59.0 | 39    | C95 H81 N7 O3     |
|           | 1367.6534  | -6.7 | -4.9 | 47.5 | 9     | C83 H84 N12 O6 Na |

[M+H]<sup>+</sup>

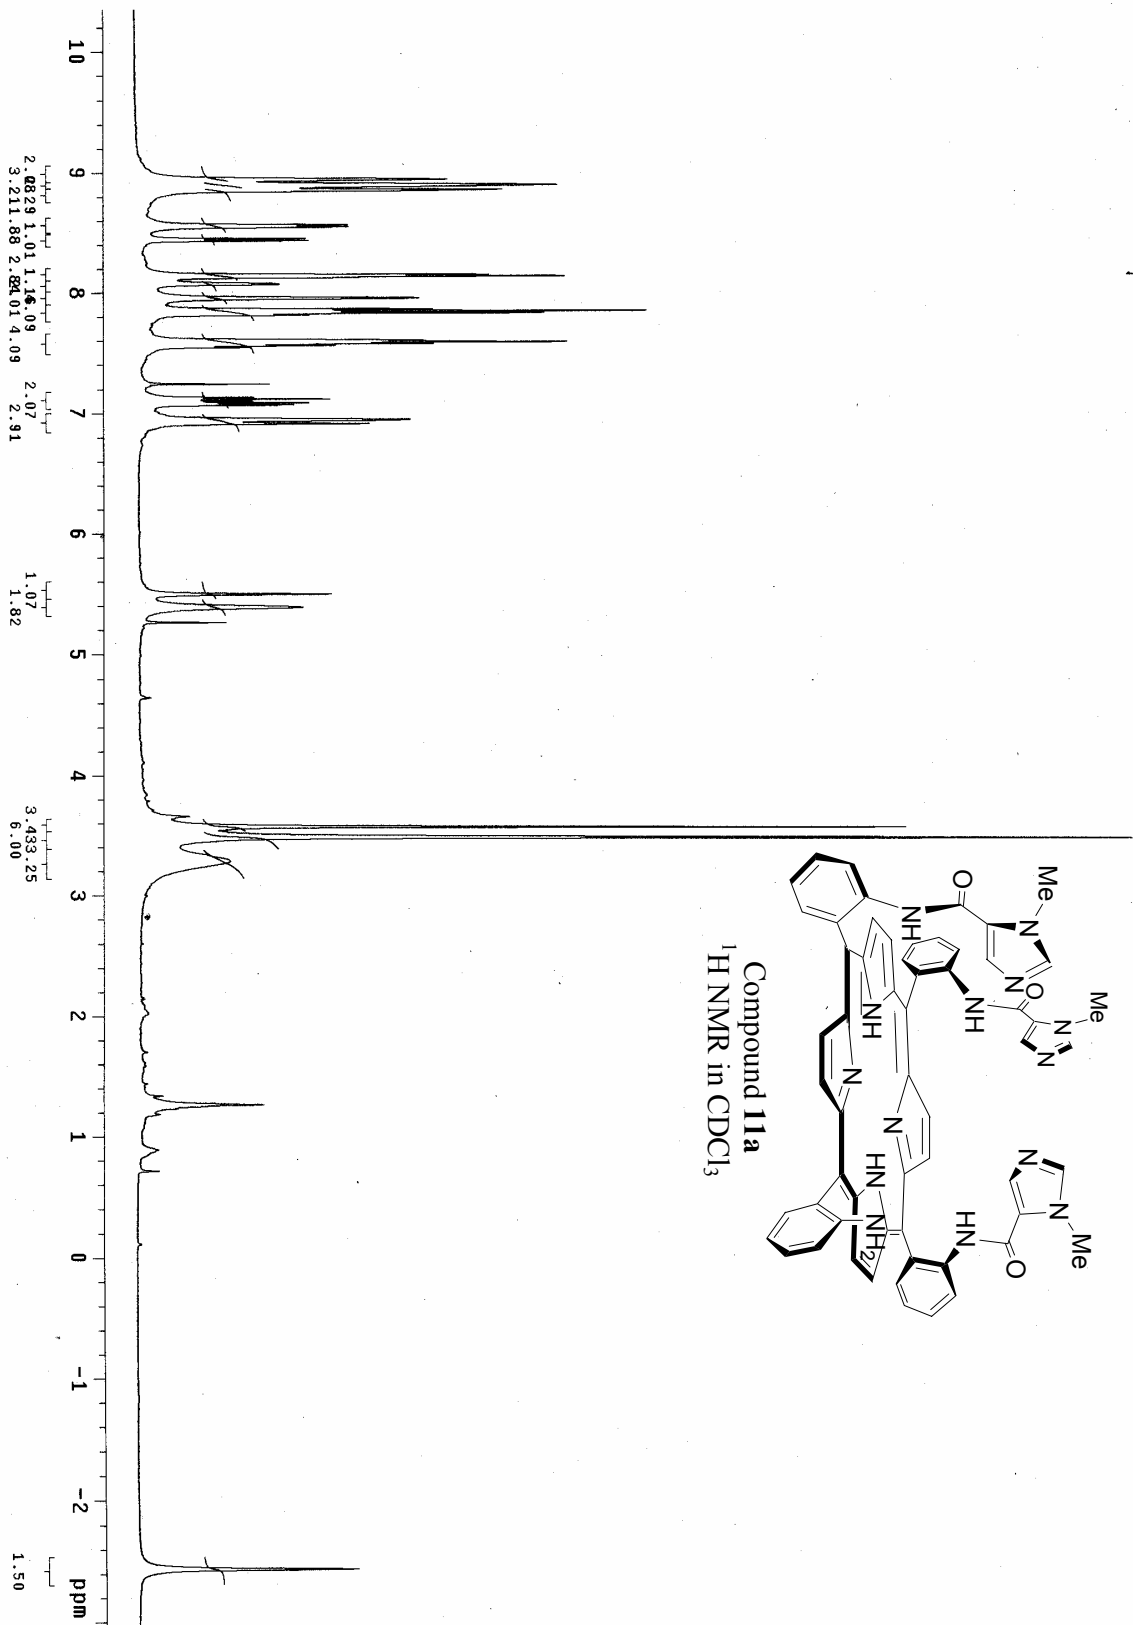

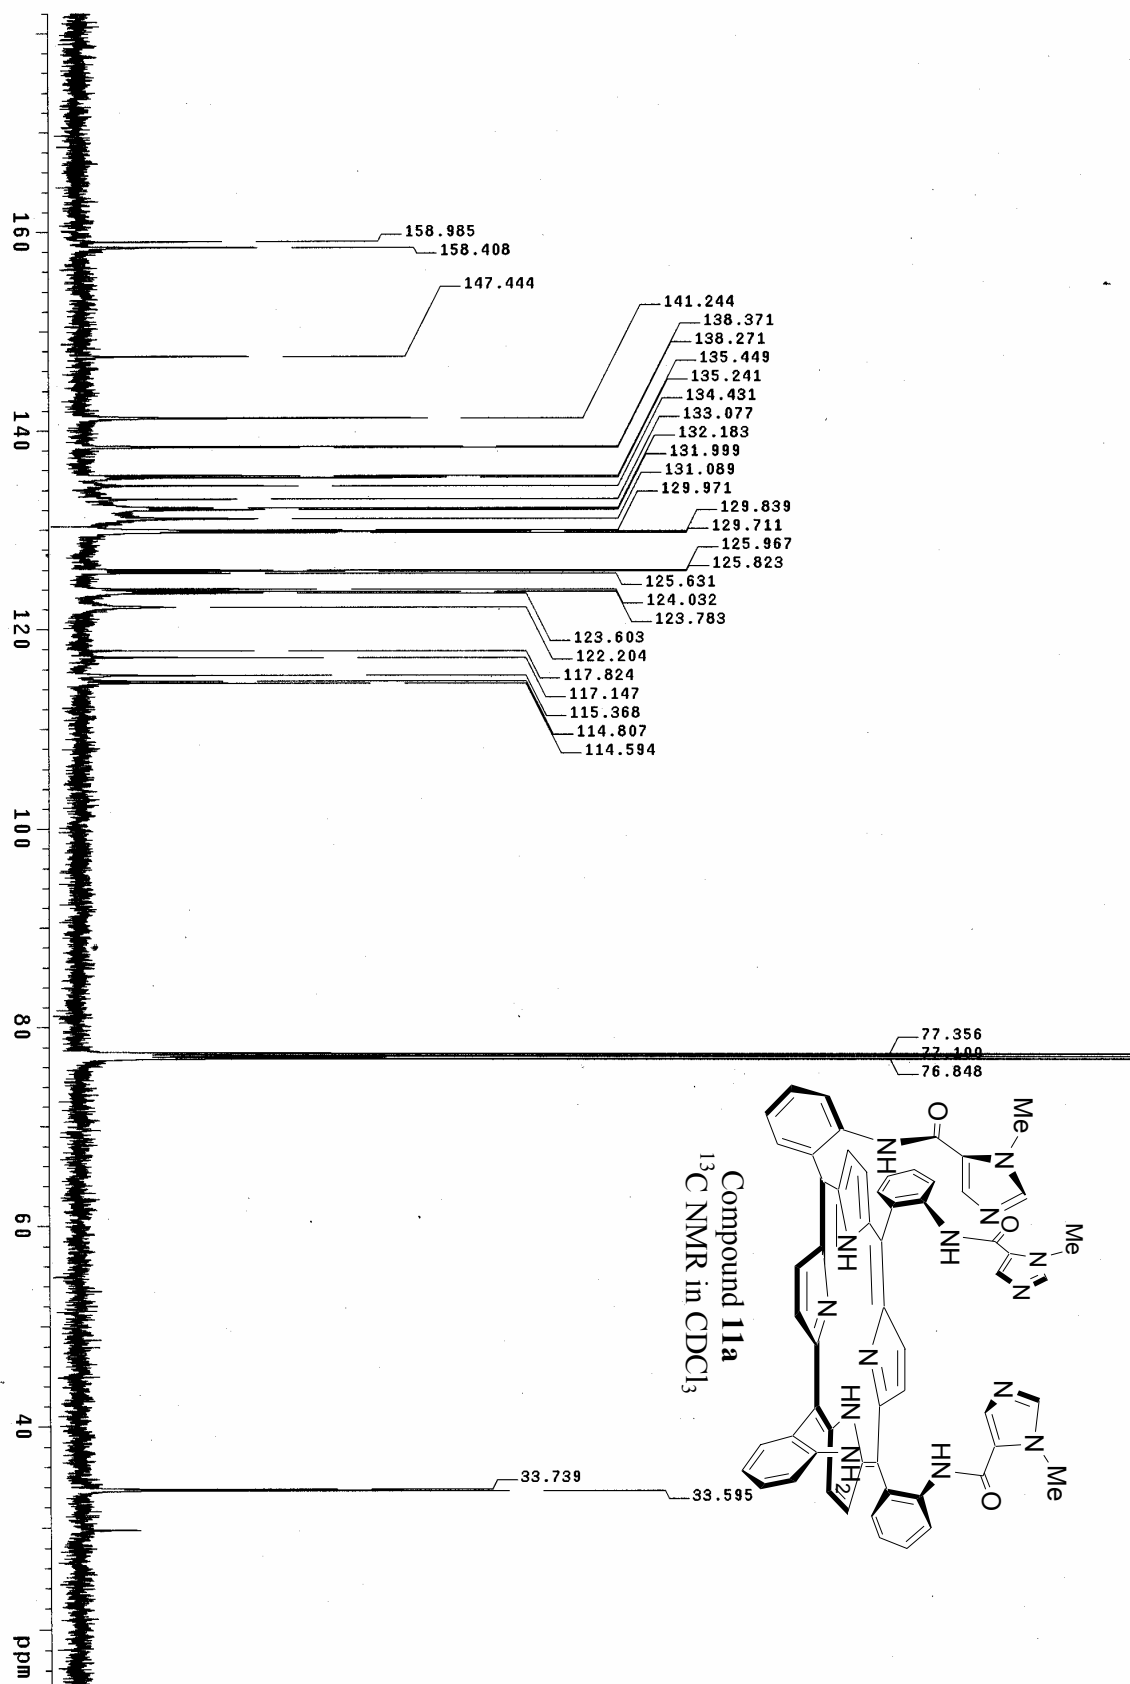

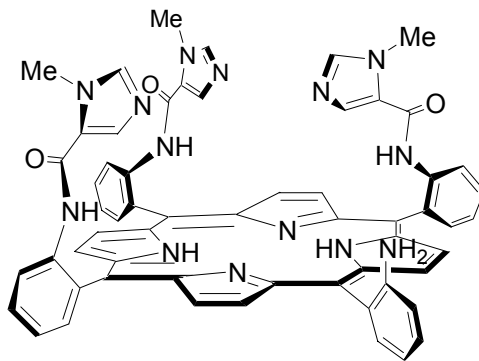

Compound 11a, Low resolution mass analysis

YanY\_051026\_16192\_02 20 (0.956) Cm (16:27)

1: Scan ES+  
3.45e7

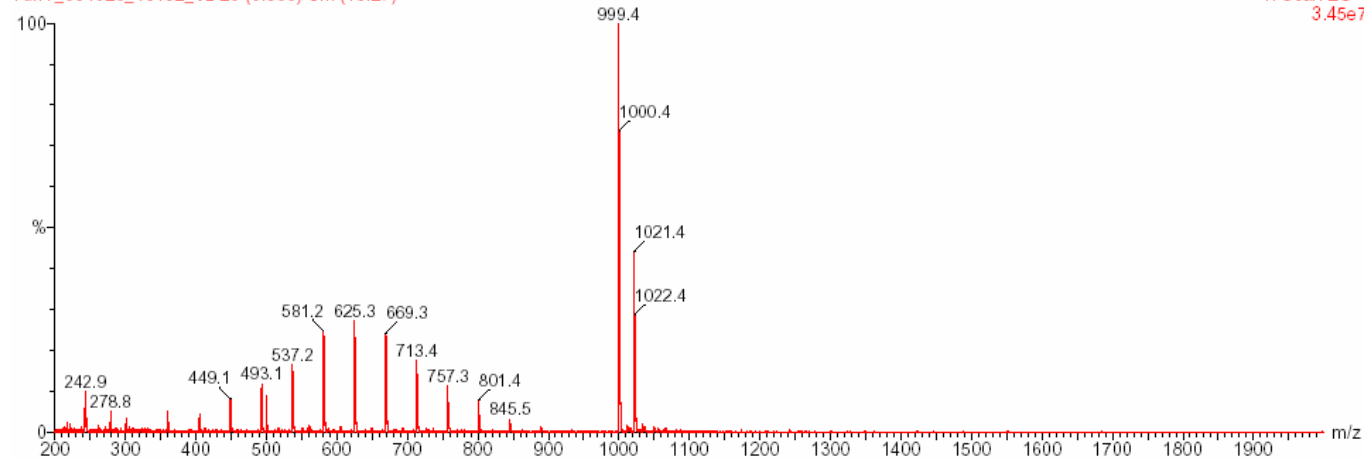

Yan-4-27

26-Oct-2005  
16:36:02

YanY\_051026\_16192\_02 20 (0.956) Cm (16:27)

1: Scan ES+  
3.45e7

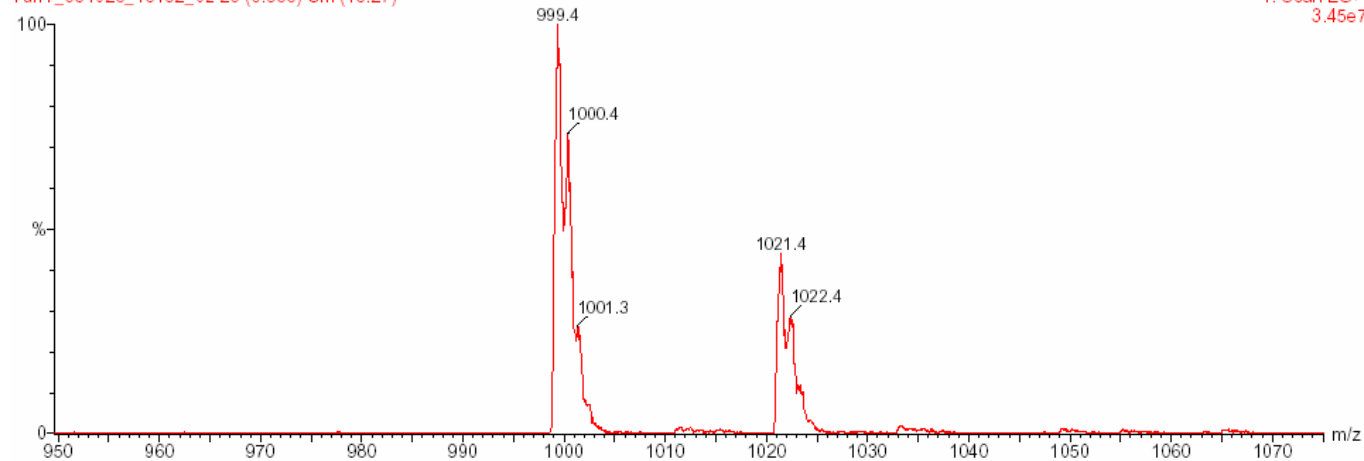

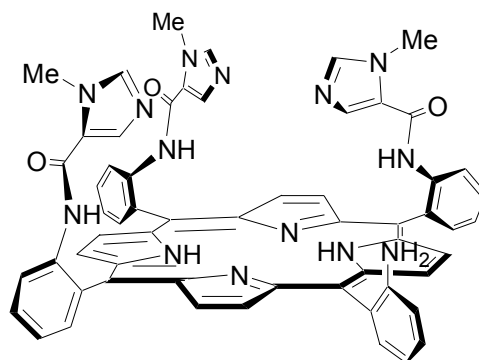

## Compound 11a, High resolution mass analysis

### Elemental Composition Report

Page 1

#### Single Mass Analysis

Tolerance = 5.0 PPM / DBE: min = -1.5, max = 120.0

Isotope cluster parameters: Separation = 1.0 Abundance = 1.0%

Monoisotopic Mass, Odd and Even Electron Ions

3897 formula(e) evaluated with 37 results within limits (up to 140 closest results for each mass)

Yilong Yan, Yan-4-27

YANYILONG\_051205\_16381\_YAN-4-27\_HRMS 21 (0.895) Cn (Cen.4, 80.00, Ar); Sm (SG, 2x3.00); Sb (2.20.00); Cm (20:30)

05-Dec-2005  
17:35:21  
TOF MS ES+  
1.08e4

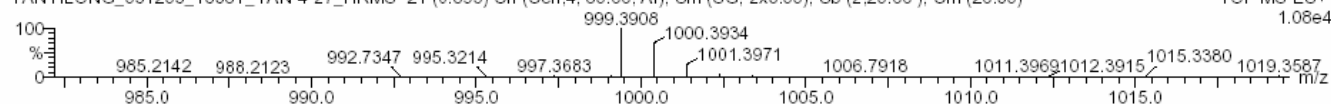

Minimum: -1.5  
Maximum: 200.0 5.0 120.0

| Mass     | Calc. Mass | mDa  | PPM  | DBE  | Score | Formula           |
|----------|------------|------|------|------|-------|-------------------|
| 999.3908 | 999.3910   | -0.2 | -0.2 | 46.5 | 28    | C69 H51 N4 O4     |
|          | 999.3905   | 0.3  | 0.3  | 36.0 | 18    | C54 H50 N13 O6 Na |
|          | 999.3913   | -0.5 | -0.5 | 48.0 | 30    | C70 H50 N5 O Na   |
|          | 999.3902   | 0.6  | 0.6  | 34.5 | 22    | C53 H51 N12 O9    |
|          | 999.3915   | -0.7 | -0.7 | 34.0 | 17    | C55 H53 N9 O10    |
|          | 999.3900   | 0.8  | 0.8  | 43.0 | 24    | C69 H54 N O5 Na   |
|          | 999.3900   | 0.8  | 0.8  | 48.5 | 27    | C68 H48 N8 Na     |
|          | 999.3918   | -1.0 | -1.0 | 35.5 | 12    | C56 H52 N10 O7 Na |
|          | 999.3897   | 1.1  | 1.1  | 41.5 | 21    | C68 H55 O8        |
|          | 999.3897   | 1.1  | 1.1  | 47.0 | 23    | C67 H49 N7 O3     |
|          | 999.3924   | -1.6 | -1.6 | 51.5 | 32    | C70 H47 N8        |
|          | 999.3924   | -1.6 | -1.6 | 46.0 | 31    | C71 H53 N O5      |
|          | 999.3891   | 1.7  | 1.7  | 31.0 | 25    | C53 H54 N9 O10 Na |
|          | 999.3926   | -1.8 | -1.9 | 47.5 | 34    | C72 H52 N2 O2 Na  |
|          | 999.3889   | 1.9  | 1.9  | 35.0 | 26    | C51 H49 N15 O8    |
|          | 999.3929   | -2.1 | -2.1 | 39.0 | 9     | C56 H49 N13 O6    |
|          | 999.3886   | 2.2  | 2.2  | 43.5 | 20    | C67 H52 N4 O4 Na  |
|          | 999.3932   | -2.4 | -2.4 | 40.5 | 6     | C57 H48 N14 O3 Na |
|          | 999.3932   | -2.4 | -2.4 | 35.0 | 7     | C58 H54 N7 O8 Na  |
|          | 999.3884   | 2.4  | 2.4  | 42.0 | 16    | C66 H53 N3 O7     |
|          | 999.3883   | 2.5  | 2.5  | 47.5 | 19    | C65 H47 N10 O2    |
|          | 999.3937   | -2.9 | -2.9 | 51.0 | 35    | C72 H49 N5 O      |
|          | 999.3878   | 3.0  | 3.0  | 31.5 | 29    | C51 H52 N12 O9 Na |
|          | 999.3942   | -3.4 | -3.4 | 38.5 | 5     | C58 H51 N10 O7    |
|          | 999.3873   | 3.5  | 3.5  | 38.5 | 13    | C66 H56 O8 Na     |
|          | 999.3873   | 3.5  | 3.5  | 44.0 | 15    | C65 H50 N7 O3 Na  |
|          | 999.3945   | -3.7 | -3.7 | 40.0 | 3     | C59 H50 N11 O4 Na |
|          | 999.3945   | -3.7 | -3.7 | 34.5 | 2     | C60 H56 N4 O9 Na  |
|          | 999.3870   | 3.8  | 3.8  | 42.5 | 11    | C64 H51 N6 O6     |
|          | 999.3870   | 3.8  | 3.8  | 48.0 | 14    | C63 H45 N13 O     |
|          | 999.3951   | -4.3 | -4.3 | 50.5 | 36    | C74 H51 N2 O2     |
|          | 999.3865   | 4.3  | 4.3  | 55.0 | 37    | C78 H49 N         |
|          | 999.3864   | 4.4  | 4.4  | 32.0 | 33    | C49 H50 N15 O8 Na |
|          | 999.3956   | -4.8 | -4.8 | 43.5 | 4     | C59 H47 N14 O3    |
|          | 999.3956   | -4.8 | -4.8 | 38.0 | 1     | C60 H53 N7 O8     |
|          | 999.3859   | 4.9  | 4.9  | 39.0 | 8     | C64 H54 N3 O7 Na  |
|          | 999.3859   | 4.9  | 4.9  | 44.5 | 10    | C63 H48 N10 O2 Na |

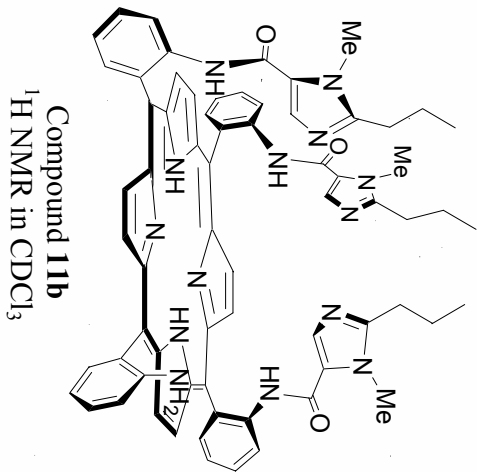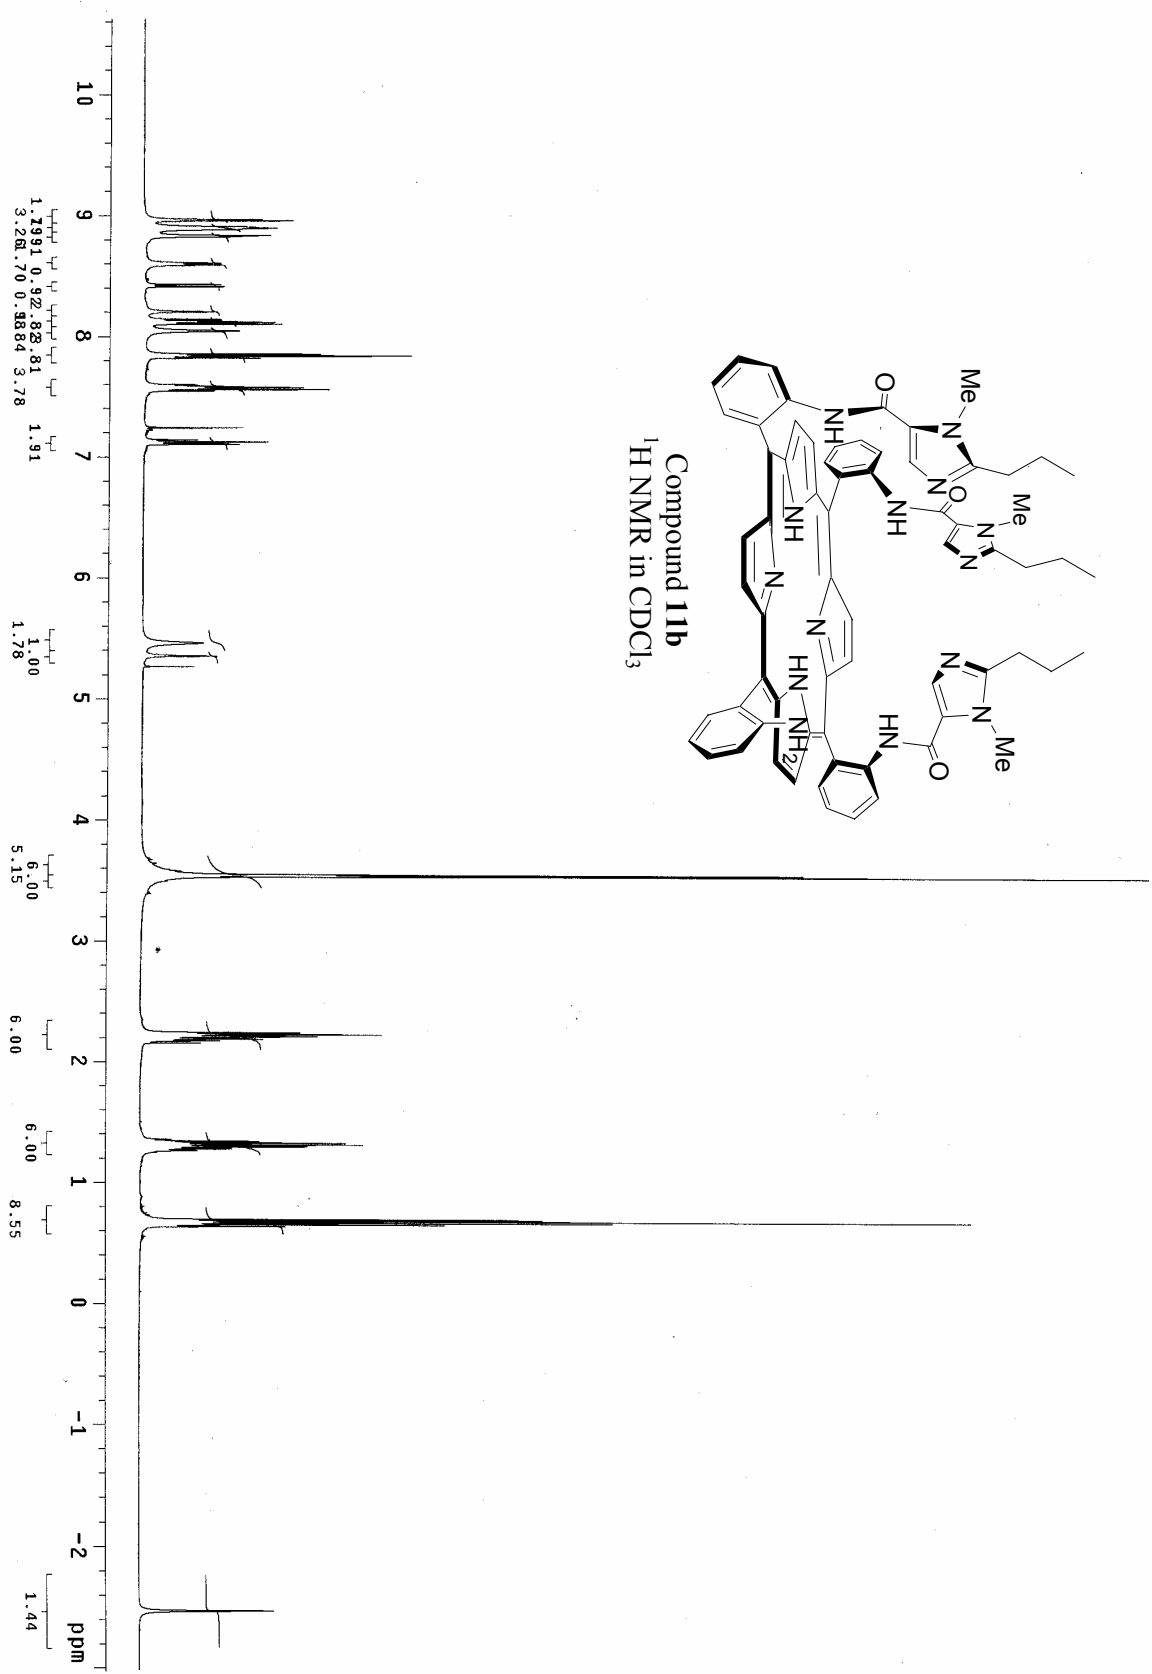



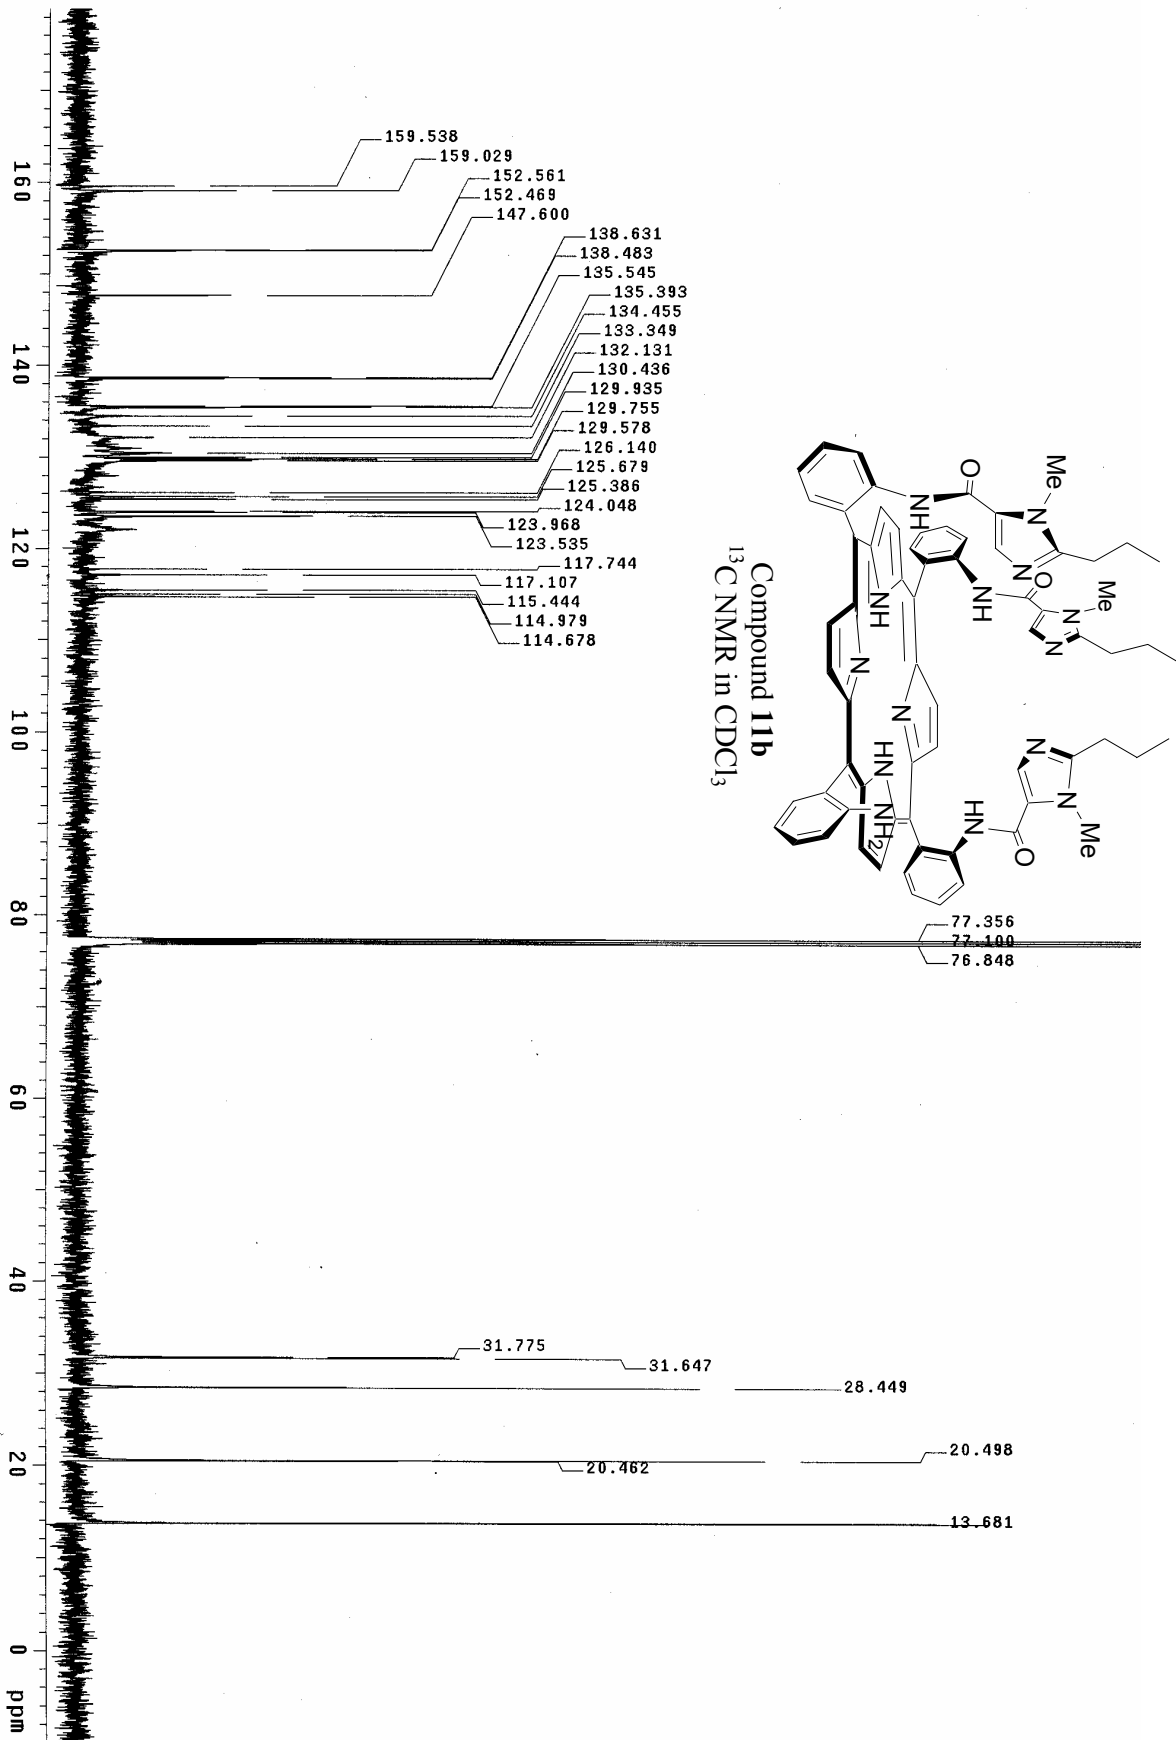

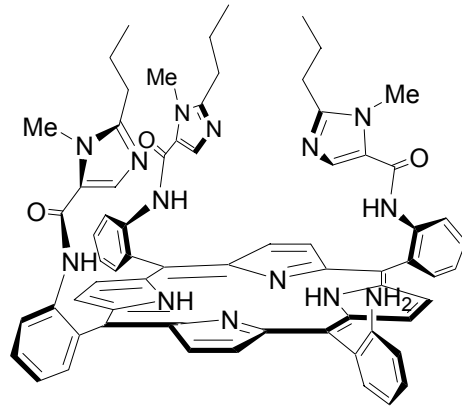

Compound **11b**, Low resolution mass analysis

YanY\_051202\_16376\_07 13 (1.137) Cm (10:15)

1: Scan ES+  
1.03e8

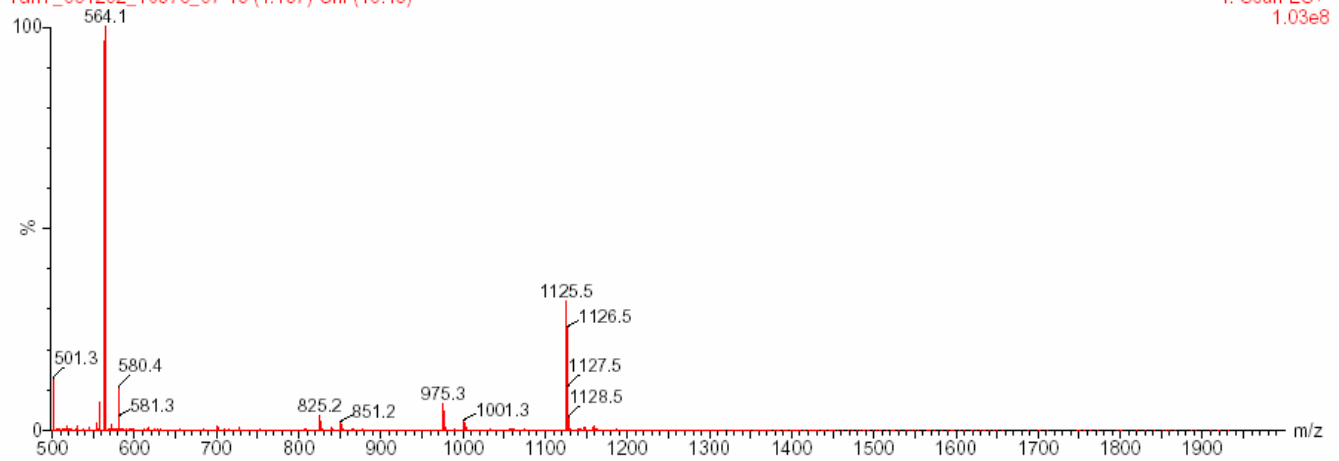

Yan-4-40

YanY\_051202\_16376\_07 12 (1.103) Cm (11:13)

2: Scan ES-  
4.13e6

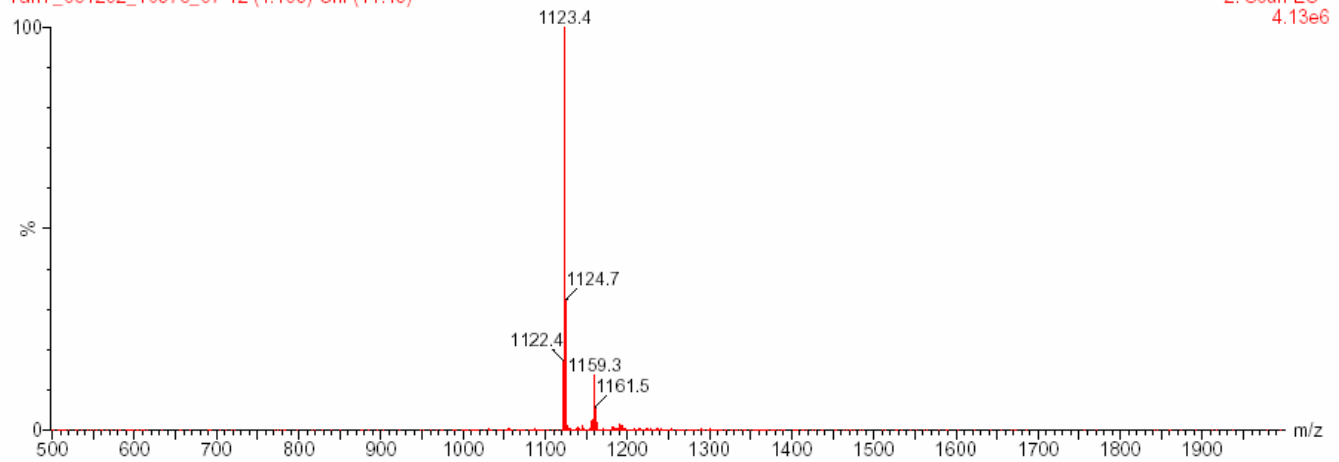

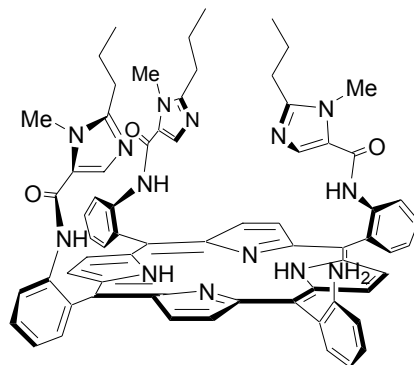

Compound **11b**, High resolution mass analysis

Elemental Composition Report

Single Mass Analysis

Tolerance = 5.0 PPM / DBE: min = -1.5, max = 120.0

Isotope cluster parameters: Separation = 1.0 Abundance = 1.0%

Monoisotopic Mass, Odd and Even Electron Ions

4454 formula(e) evaluated with 43 results within limits (up to 140 closest results for each mass)

Yilong Yan, Yan-4-40

Cone V = 30  
Coll V = 10.0

05-Dec-2005

YANYILONG\_051205\_16381\_YAN-4-40\_HRMS 33 (1.403) Cn (Cen,4, 80.00, Ar); Sm (SG, 2x3.00); Sb (2.20,00); Cm (29;38)

16:53:50

TOF MS ES+

2.66e4

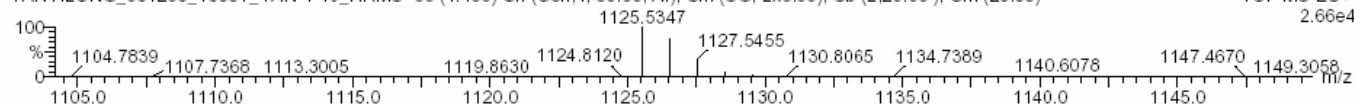

Minimum: -1.5  
Maximum: 200.0 5.0 120.0

| Mass      | Calc. Mass | mDa  | PPM  | DBE  | Score | Formula                             |
|-----------|------------|------|------|------|-------|-------------------------------------|
| 1125.5347 | 1125.5346  | 0.1  | 0.1  | 51.0 | 40    | C81 H67 N5 O                        |
|           | 1125.5351  | -0.4 | -0.3 | 38.5 | 4     | C67 H69 N10 O7                      |
|           | 1125.5353  | -0.6 | -0.6 | 40.0 | 10    | C68 H68 N11 O4 Na                   |
|           | 1125.5354  | -0.7 | -0.6 | 34.5 | 2     | C69 H74 N4 O9 Na                    |
|           | 1125.5340  | 0.7  | 0.6  | 35.0 | 1     | C67 H72 N7 O8 Na                    |
|           | 1125.5340  | 0.7  | 0.6  | 40.5 | 8     | C66 H66 N14 O3 Na                   |
|           | 1125.5337  | 1.0  | 0.9  | 39.0 | 3     | C65 H67 N13 O6                      |
|           | 1125.5335  | 1.2  | 1.1  | 47.5 | 39    | C81 H70 N2 O2 Na                    |
|           | 1125.5359  | -1.2 | -1.1 | 50.5 | 41    | C83 H69 N2 O2                       |
|           | 1125.5332  | 1.5  | 1.3  | 46.0 | 37    | C80 H71 N O5                        |
|           | 1125.5332  | 1.5  | 1.3  | 51.5 | 38    | C79 H65 N8                          |
|           | 1125.5364  | -1.7 | -1.5 | 43.5 | 14    | C68 H65 N14 O3 ← [M+H] <sup>+</sup> |
|           | 1125.5364  | -1.7 | -1.5 | 38.0 | 9     | C69 H71 N7 O8                       |
|           | 1125.5367  | -2.0 | -1.8 | 45.0 | 19    | C69 H64 N15 Na                      |
|           | 1125.5367  | -2.0 | -1.8 | 39.5 | 15    | C70 H70 N8 O5 Na                    |
|           | 1125.5367  | -2.0 | -1.8 | 34.0 | 5     | C71 H76 N O10 Na                    |
|           | 1125.5327  | 2.0  | 1.8  | 35.5 | 6     | C65 H70 N10 O7 Na                   |
|           | 1125.5324  | 2.3  | 2.1  | 34.0 | 7     | C64 H71 N9 O10                      |
|           | 1125.5322  | 2.5  | 2.3  | 48.0 | 36    | C79 H68 N5 O Na                     |
|           | 1125.5319  | 2.8  | 2.5  | 46.5 | 35    | C78 H69 N4 O4                       |
|           | 1125.5375  | -2.8 | -2.5 | 51.5 | 42    | C86 H70 Na                          |
|           | 1125.5378  | -3.1 | -2.7 | 43.0 | 18    | C70 H67 N11 O4                      |
|           | 1125.5378  | -3.1 | -2.7 | 37.5 | 12    | C71 H73 N4 O9                       |
|           | 1125.5380  | -3.3 | -3.0 | 44.5 | 23    | C71 H66 N12 O Na                    |
|           | 1125.5380  | -3.3 | -3.0 | 39.0 | 20    | C72 H72 N5 O6 Na                    |
|           | 1125.5313  | 3.4  | 3.0  | 36.0 | 11    | C63 H68 N13 O6 Na                   |
|           | 1125.5310  | 3.7  | 3.2  | 34.5 | 13    | C62 H69 N12 O9                      |
|           | 1125.5308  | 3.9  | 3.4  | 43.0 | 33    | C78 H72 N O5 Na                     |
|           | 1125.5308  | 3.9  | 3.5  | 48.5 | 34    | C77 H66 N8 Na                       |
|           | 1125.5305  | 4.2  | 3.7  | 41.5 | 31    | C77 H73 O8                          |
|           | 1125.5305  | 4.2  | 3.7  | 47.0 | 32    | C76 H67 N7 O3                       |
|           | 1125.5391  | -4.4 | -3.9 | 48.0 | 26    | C71 H63 N15                         |
|           | 1125.5391  | -4.4 | -3.9 | 42.5 | 24    | C72 H69 N8 O5                       |
|           | 1125.5391  | -4.4 | -3.9 | 37.0 | 17    | C73 H75 N O10                       |
|           | 1125.5394  | -4.7 | -4.1 | 44.0 | 27    | C73 H68 N9 O2 Na                    |
|           | 1125.5394  | -4.7 | -4.2 | 38.5 | 22    | C74 H74 N2 O7 Na                    |
|           | 1125.5300  | 4.7  | 4.2  | 31.0 | 16    | C62 H72 N9 O10 Na                   |
|           | 1125.5297  | 5.0  | 4.4  | 35.0 | 21    | C60 H67 N15 O8                      |
|           | 1125.5399  | -5.2 | -4.6 | 31.5 | 25    | C59 H70 N14 O8 Na                   |
|           | 1125.5295  | 5.2  | 4.6  | 43.5 | 30    | C76 H70 N4 O4 Na                    |
|           | 1125.5399  | -5.2 | -4.6 | 54.5 | 43    | C88 H69                             |
|           | 1125.5292  | 5.5  | 4.9  | 42.0 | 28    | C75 H71 N3 O7                       |
|           | 1125.5292  | 5.5  | 4.9  | 47.5 | 29    | C74 H65 N10 O2                      |

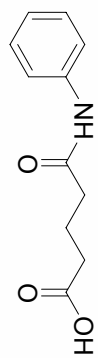

Compound 13  
<sup>1</sup>H NMR in CDCl<sub>3</sub>

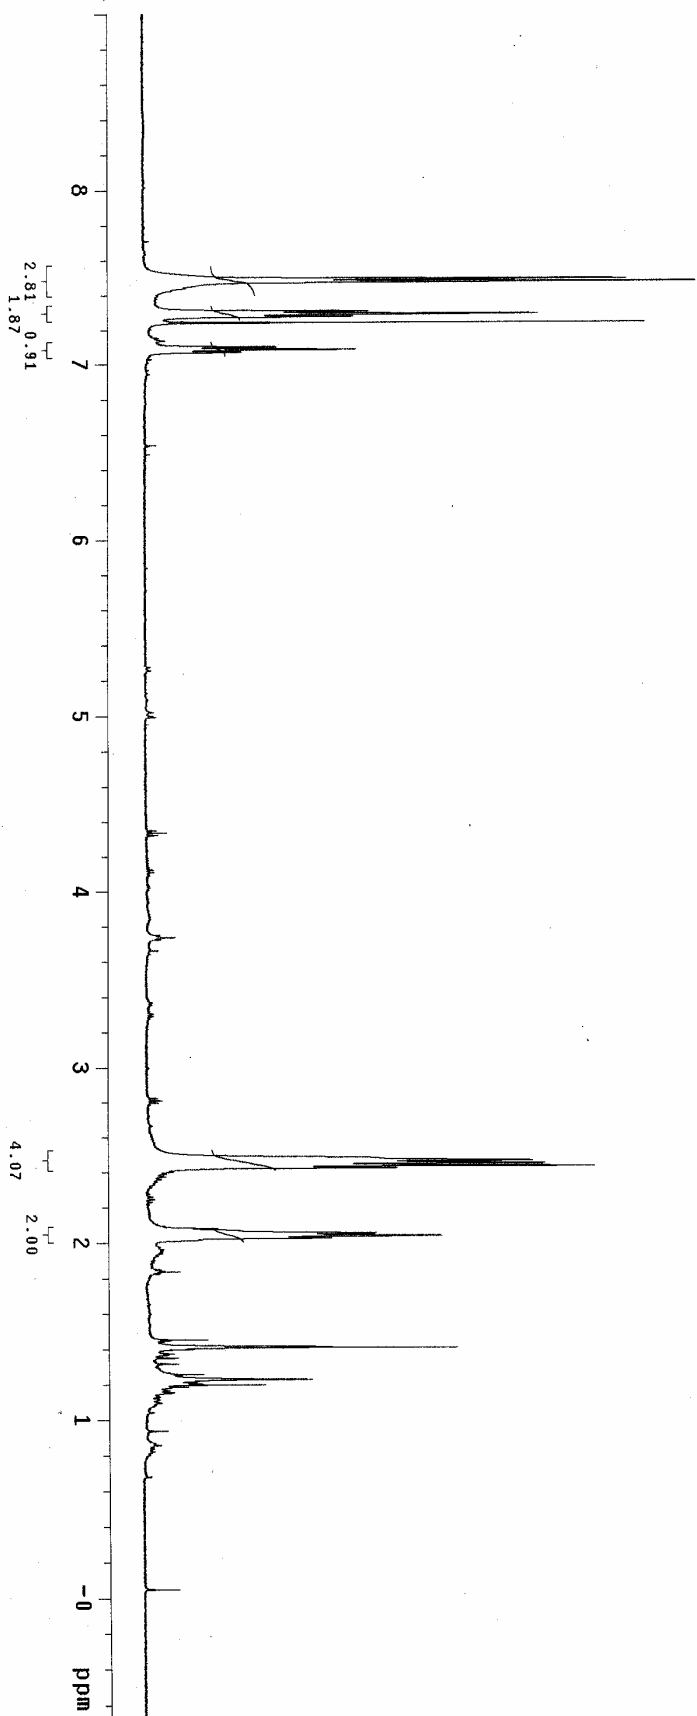

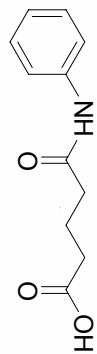

Compound **13**  
<sup>1</sup>H NMR in DMSO-d<sub>6</sub>

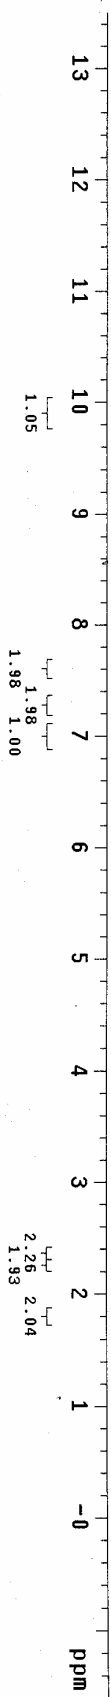

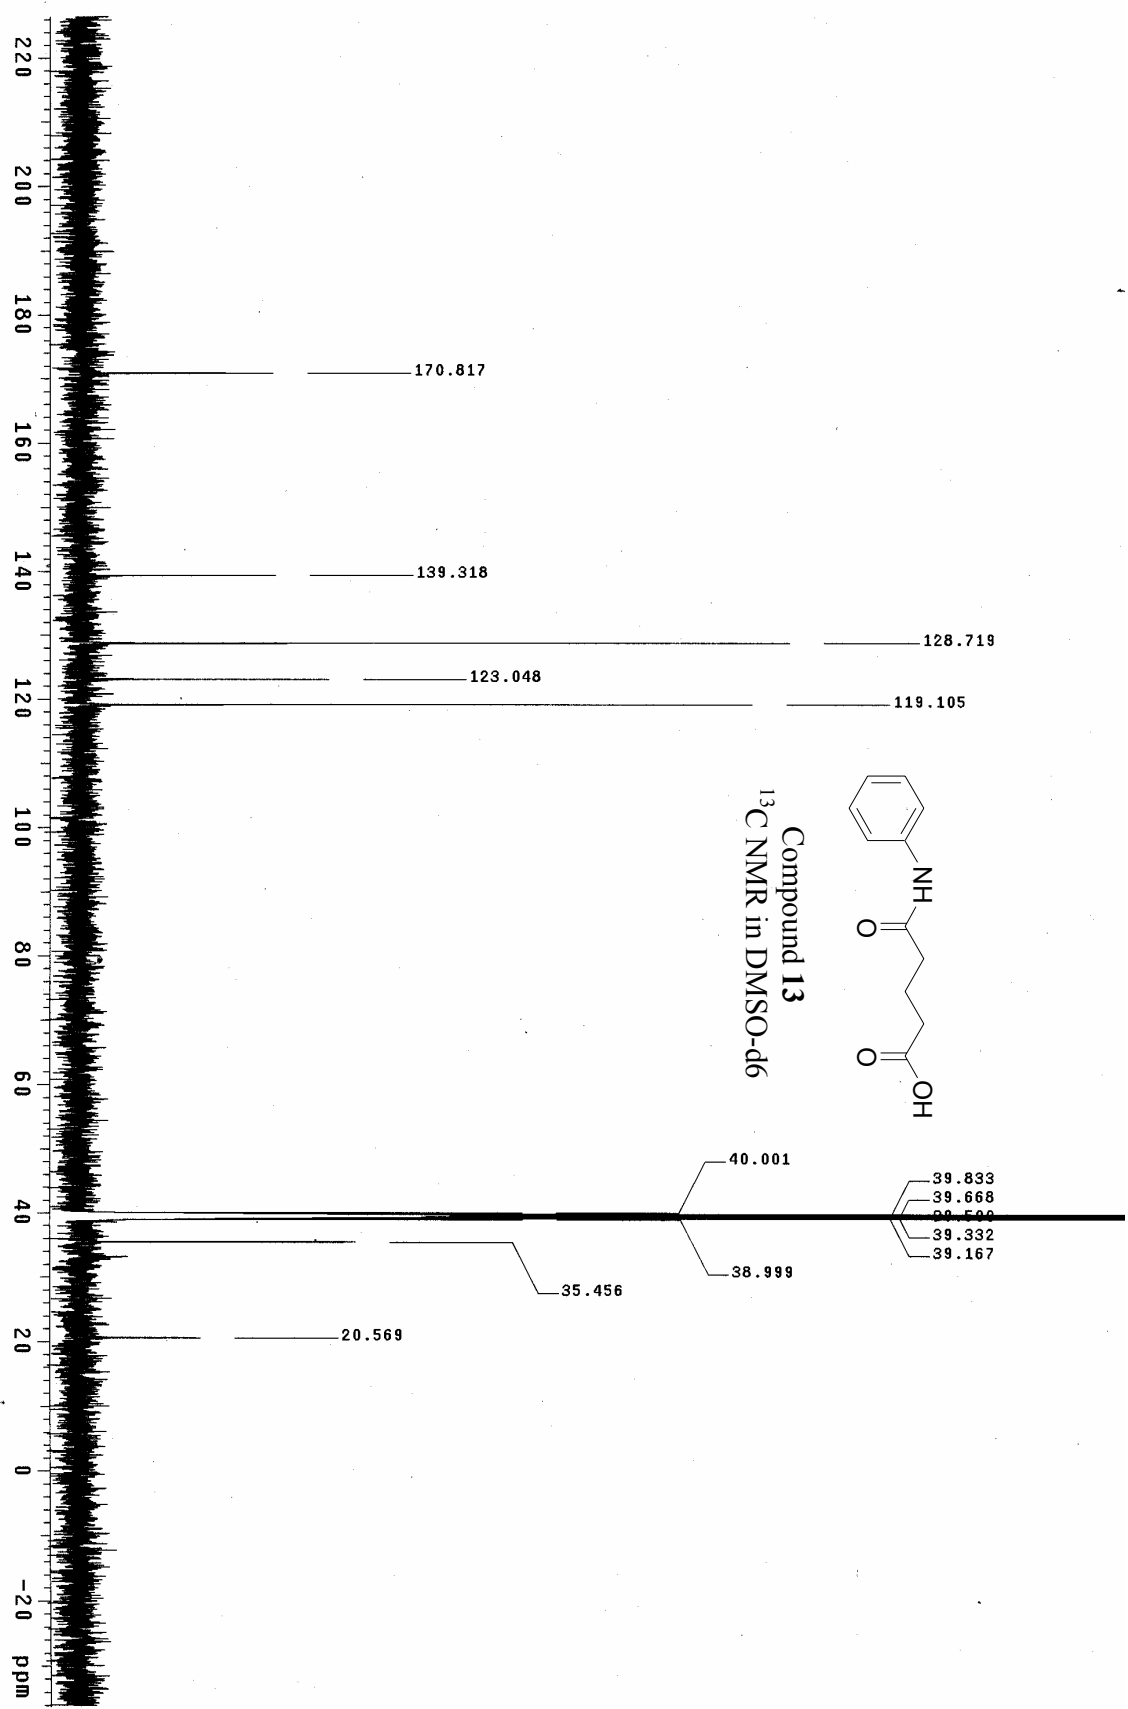

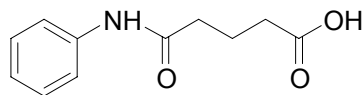

Compound 13: Low resolution mass analysis

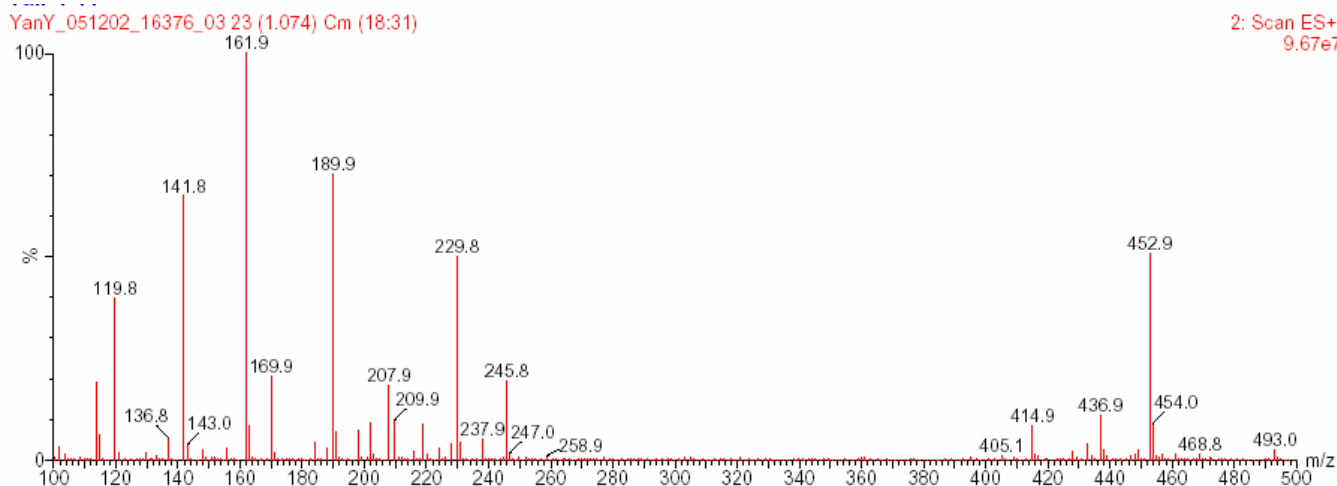

Compound 13: High resolution mass analysis

Elemental Composition Report

Single Mass Analysis

Tolerance = 5.0 PPM / DBE: min = -1.5, max = 120.0  
 Isotope cluster parameters: Separation = 1.0 Abundance = 1.0%

Monoisotopic Mass, Odd and Even Electron Ions  
 465 formula(e) evaluated with 6 results within limits (up to 140 closest results for each mass)

Yilong Yan, Yan-4-44 Cone V = 30  
Coll V = 10.0  
05-Dec-2005  
16:24:02  
 YANYILONG\_051205\_16381\_YAN-4-44\_HRMS 39 (1.656) Cn (Cen.4, 80.00, Ar); Sm (SG, 2x3.00); Sb (2,20.00); Cm ((36:37+39)) TOF MS ES+  
7.44e3

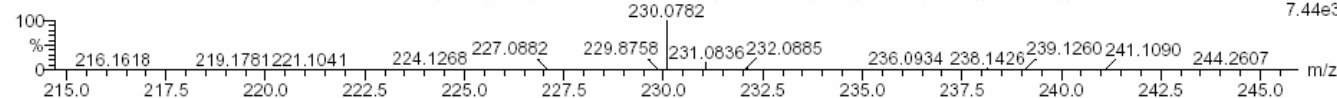

Minimum: -1.5  
 Maximum: 200.0 5.0 120.0

| Mass     | Calc. Mass | mDa  | PPM  | DBE  | Score | Formula                               |
|----------|------------|------|------|------|-------|---------------------------------------|
| 230.0782 | 230.0780   | 0.2  | 1.0  | 6.0  | 4     | C9 H11 N4 O2 Na                       |
|          | 230.0777   | 0.5  | 2.2  | 4.5  | 6     | C8 H12 N3 O5                          |
|          | 230.0777   | 0.5  | 2.2  | 10.0 | 5     | C7 H6 N10                             |
|          | 230.0790   | -0.8 | -3.6 | 9.5  | 3     | C9 H8 N7 O                            |
|          | 230.0790   | -0.8 | -3.6 | 4.0  | 2     | C10 H14 O6                            |
|          | 230.0793   | -1.1 | -4.8 | 5.5  | 1     | C11 H13 N O3 Na ← [M+Na] <sup>+</sup> |

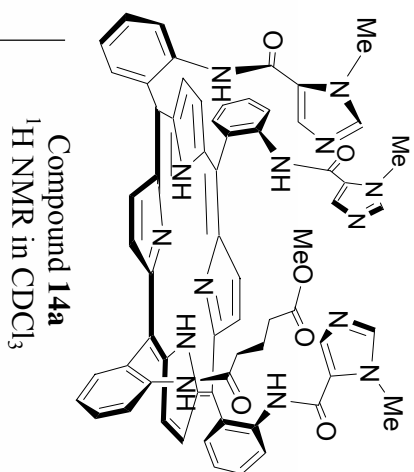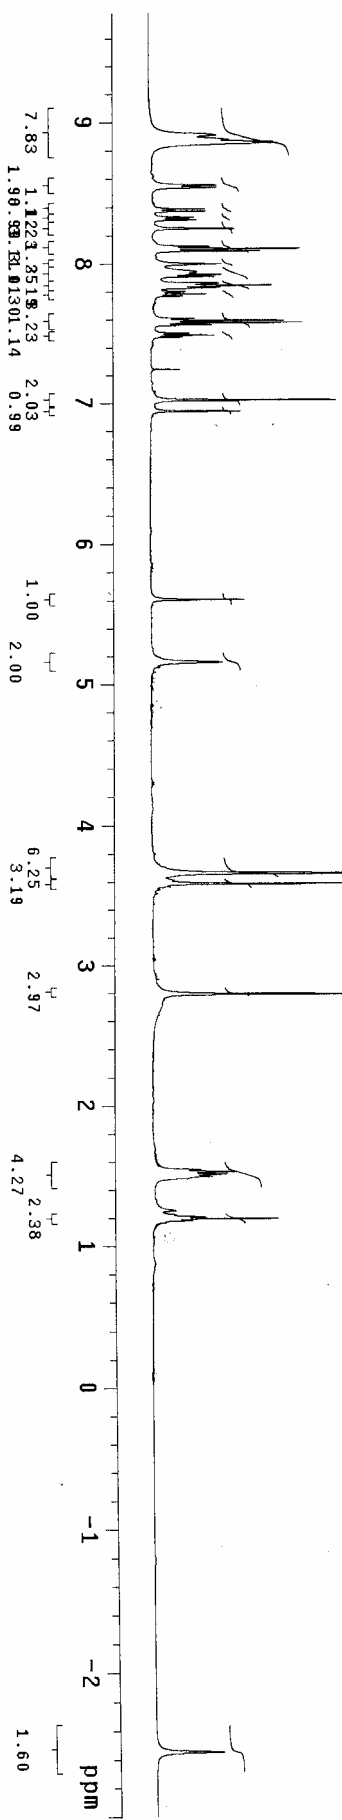



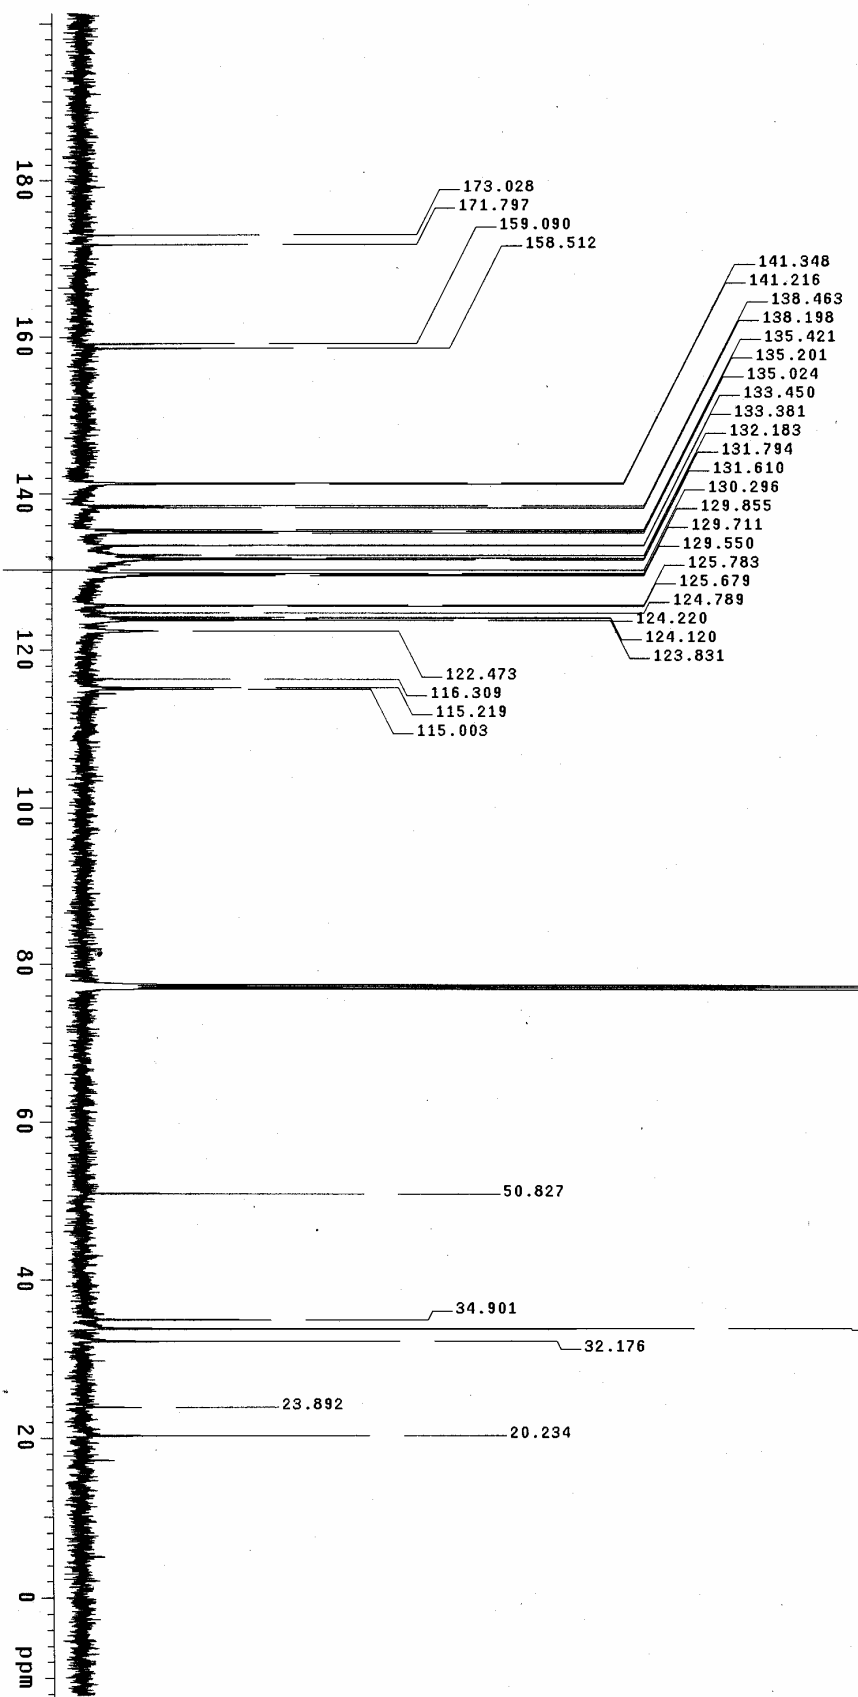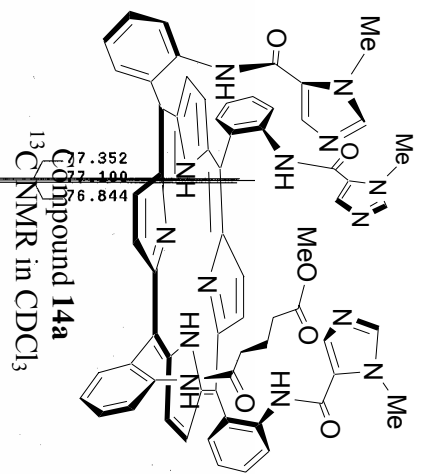

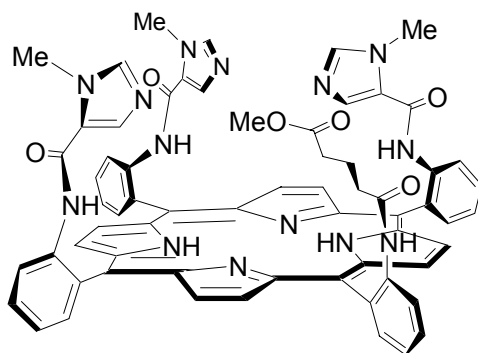

Compound **14a**: Low resolution mass analysis

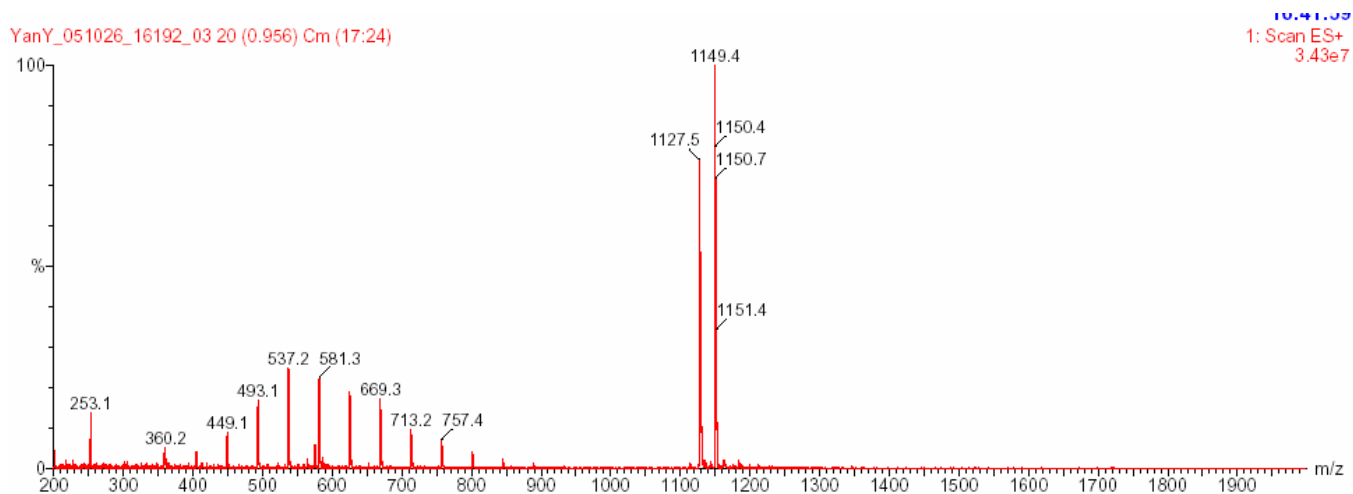

Yan-4-34

26-Oct-2005  
16:41:59

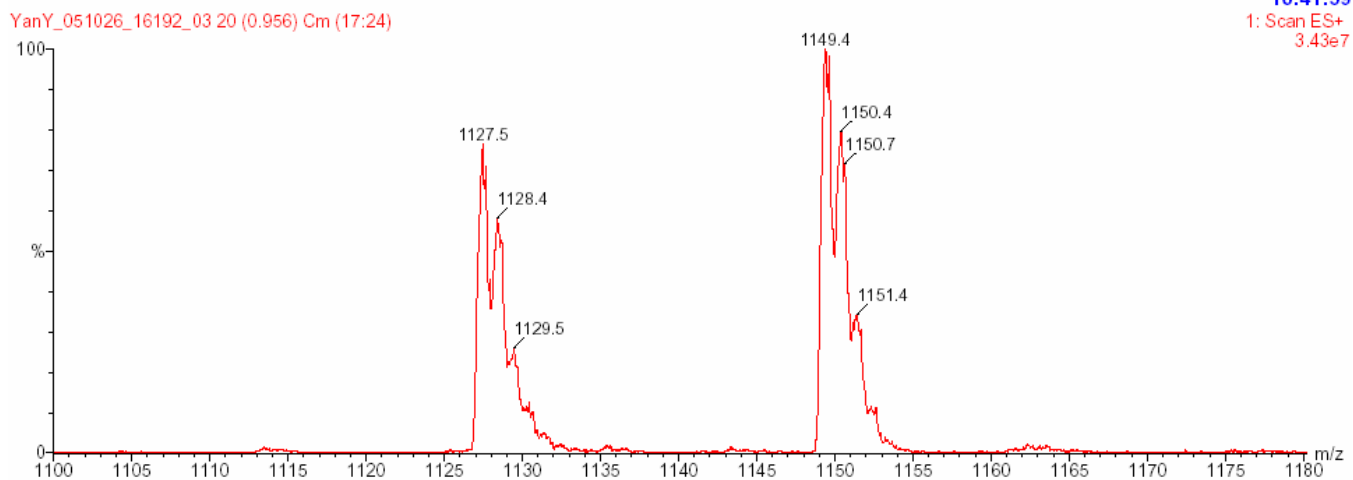

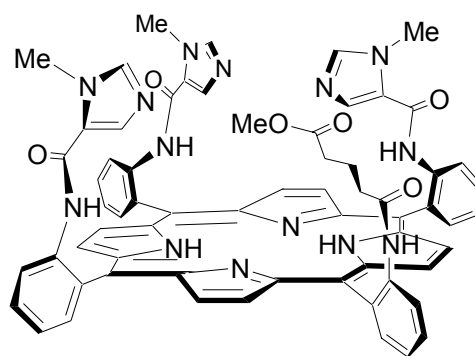

Compound **14a**: High resolution mass analysis

## Elemental Composition Report

Page 1

### Single Mass Analysis

Tolerance = 5.0 PPM / DBE: min = -1.5, max = 120.0

Isotope cluster parameters: Separation = 1.0 Abundance = 1.0%

Monoisotopic Mass, Odd and Even Electron Ions

1805 formula(e) evaluated with 20 results within limits (up to 140 closest results for each mass)

Yilong Yan, Yan-4-34  
16129

Cone V = 30  
Coll V = 10.0

02-Nov-2005  
11:17:05

YANY\_051102\_16247\_YAN-4-34\_HRMS 118 (4.025) Cn (Cen,6, 80.00, Ar); Sm (SG, 2x3.00); Sb (2,20.00); Cm (108:118)

TOF MS ES+  
5.41e3

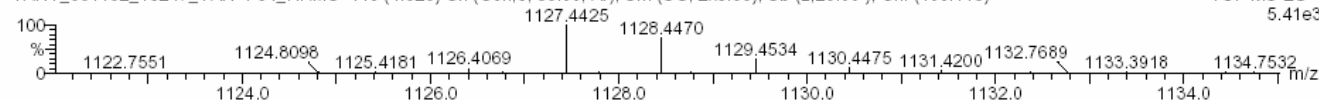

Minimum:  
Maximum:

200.0 5.0 -1.5  
120.0

| Mass      | Calc. Mass | mDa  | PPM  | DBE  | Score | Formula                             |
|-----------|------------|------|------|------|-------|-------------------------------------|
| 1127.4425 | 1127.4424  | 0.1  | 0.1  | 52.5 | 16    | C80 H59 N2 O5                       |
|           | 1127.4424  | 0.1  | 0.1  | 58.0 | 17    | C79 H53 N9                          |
|           | 1127.4429  | -0.4 | -0.4 | 45.5 | 3     | C65 H55 N14 O6 ← [M+H] <sup>+</sup> |
|           | 1127.4416  | 0.9  | 0.8  | 40.5 | 2     | C64 H59 N10 O10                     |
|           | 1127.4437  | -1.2 | -1.1 | 57.5 | 18    | C81 H55 N6 O                        |
|           | 1127.4411  | 1.4  | 1.3  | 53.0 | 15    | C78 H57 N5 O4                       |
|           | 1127.4442  | -1.7 | -1.5 | 45.0 | 4     | C67 H57 N11 O7                      |
|           | 1127.4402  | 2.3  | 2.0  | 41.0 | 1     | C62 H57 N13 O9                      |
|           | 1127.4451  | -2.6 | -2.3 | 57.0 | 19    | C83 H57 N3 O2                       |
|           | 1127.4397  | 2.8  | 2.5  | 48.0 | 12    | C77 H61 N O8                        |
|           | 1127.4397  | 2.8  | 2.5  | 53.5 | 14    | C76 H55 N8 O3                       |
|           | 1127.4456  | -3.1 | -2.7 | 50.0 | 7     | C68 H53 N15 O3                      |
|           | 1127.4456  | -3.1 | -2.7 | 44.5 | 6     | C69 H59 N8 O8                       |
|           | 1127.4464  | -3.9 | -3.5 | 56.5 | 20    | C85 H59 O3                          |
|           | 1127.4384  | 4.1  | 3.7  | 48.5 | 10    | C75 H59 N4 O7                       |
|           | 1127.4384  | 4.1  | 3.7  | 54.0 | 13    | C74 H53 N11 O2                      |
|           | 1127.4469  | -4.4 | -3.9 | 49.5 | 8     | C70 H55 N12 O4                      |
|           | 1127.4469  | -4.4 | -3.9 | 44.0 | 5     | C71 H61 N5 O9                       |
|           | 1127.4370  | 5.5  | 4.8  | 49.0 | 9     | C73 H57 N7 O6                       |
|           | 1127.4370  | 5.5  | 4.9  | 54.5 | 11    | C72 H51 N14 O                       |

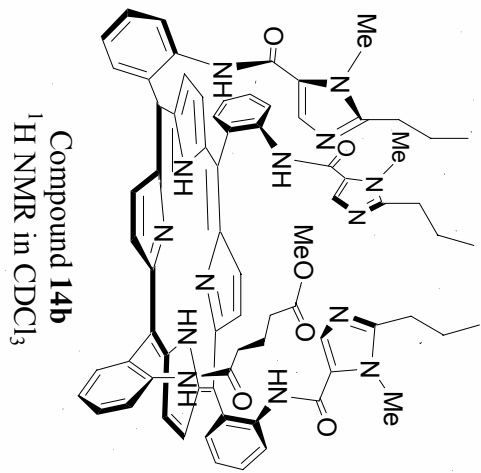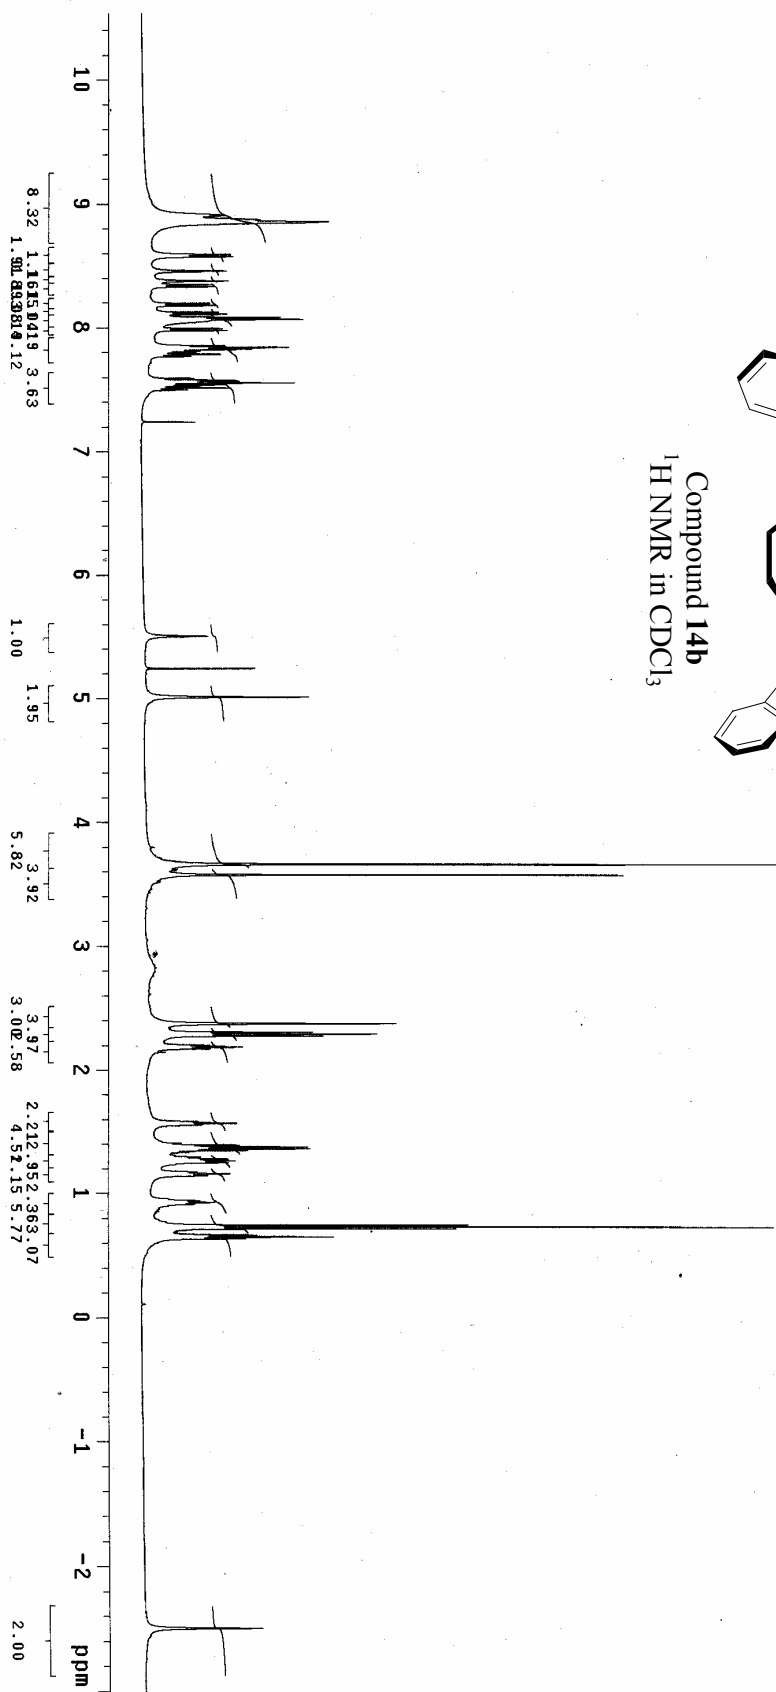

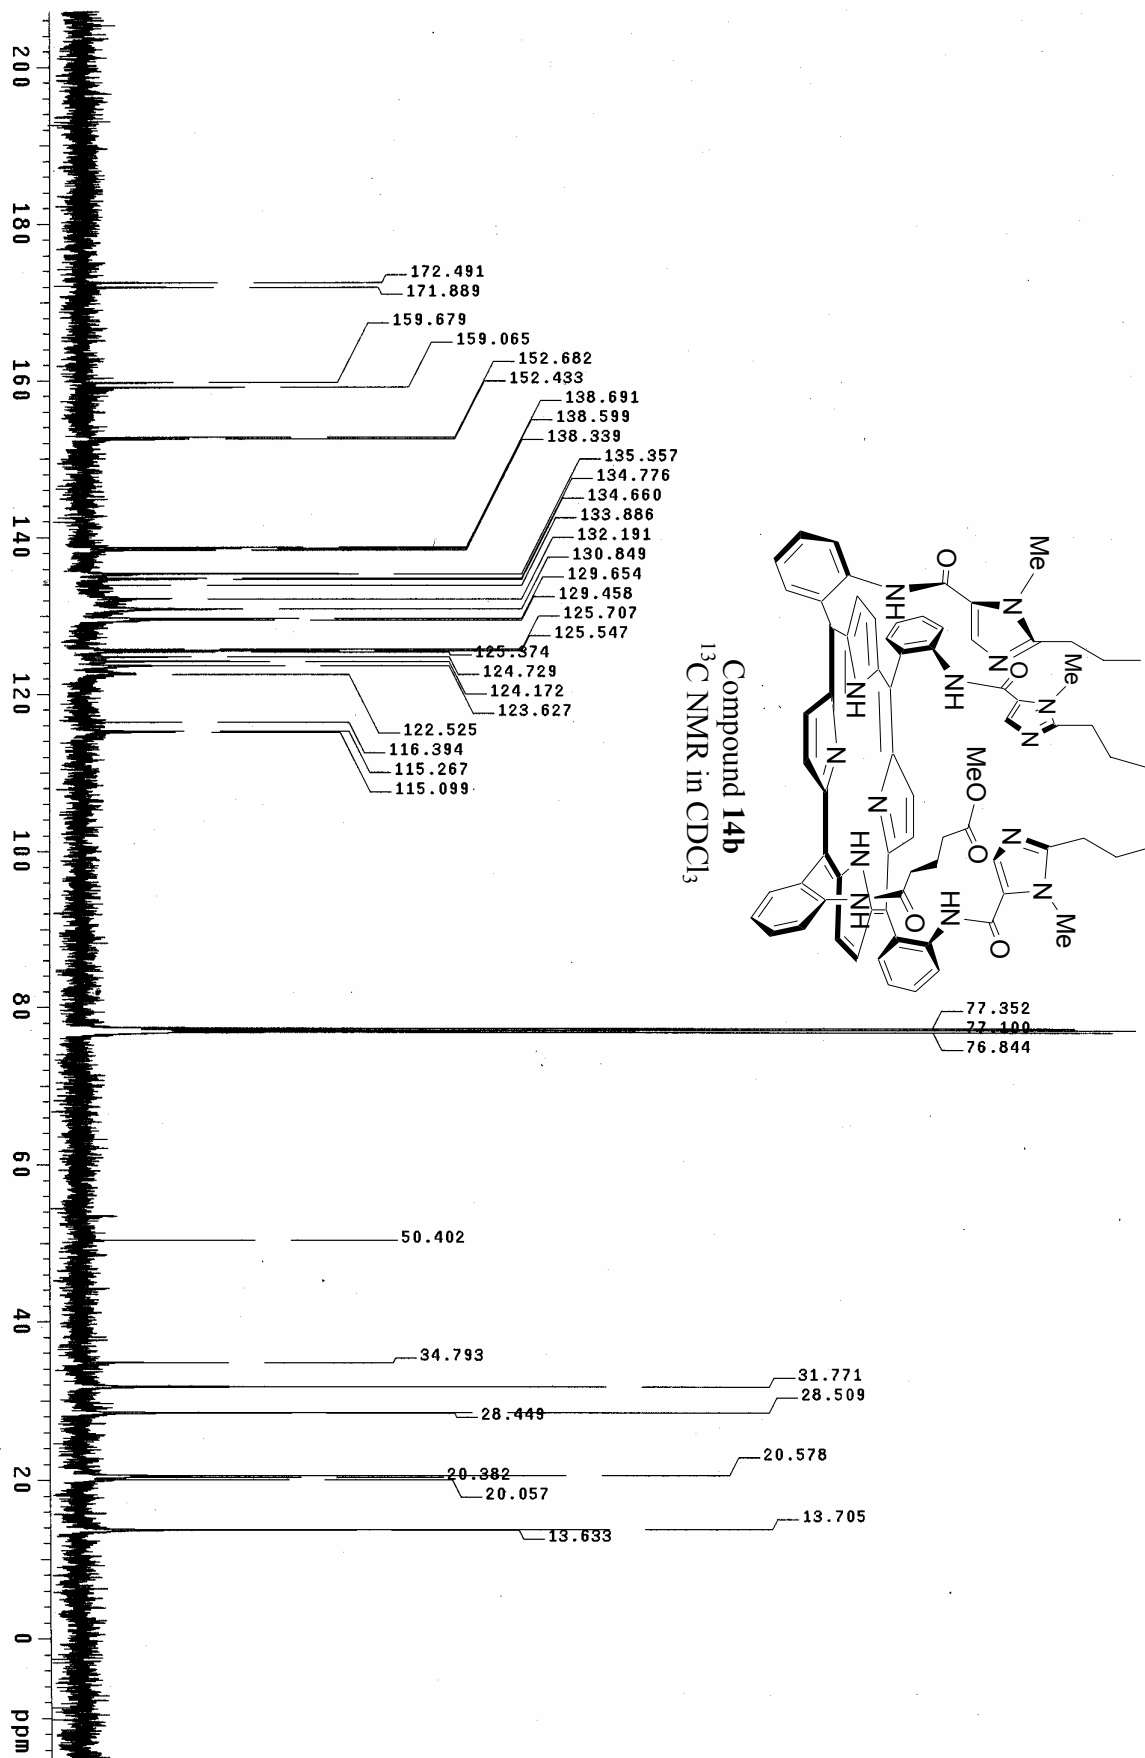

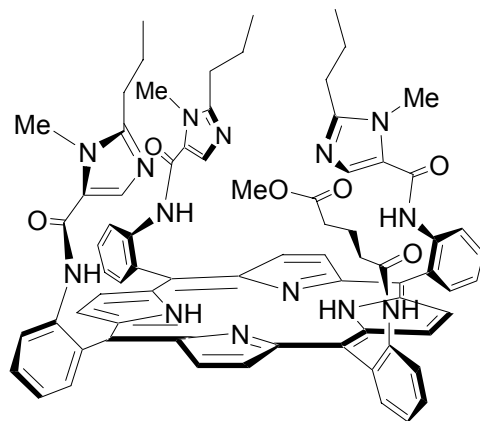

Compound **14b**, Low resolution mass analysis

YanY\_051202\_16376\_06 13 (1.137) Cm (11:15)

1: Scan ES+  
1.30e8

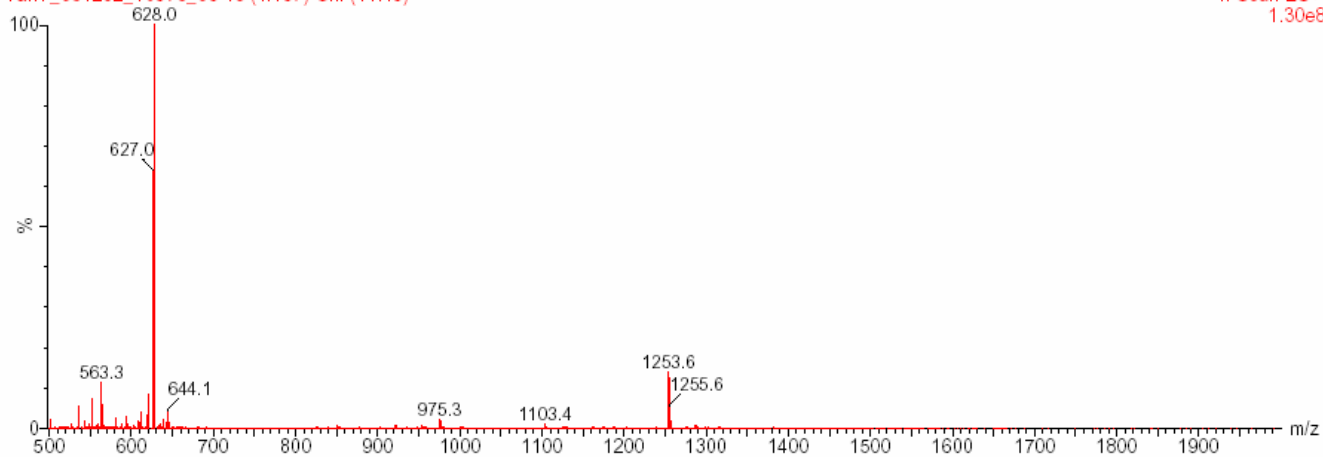

Yan-4-41

YanY\_051202\_16376\_06 12 (1.103) Cm (11:13)

2: Scan ES-  
4.67e6

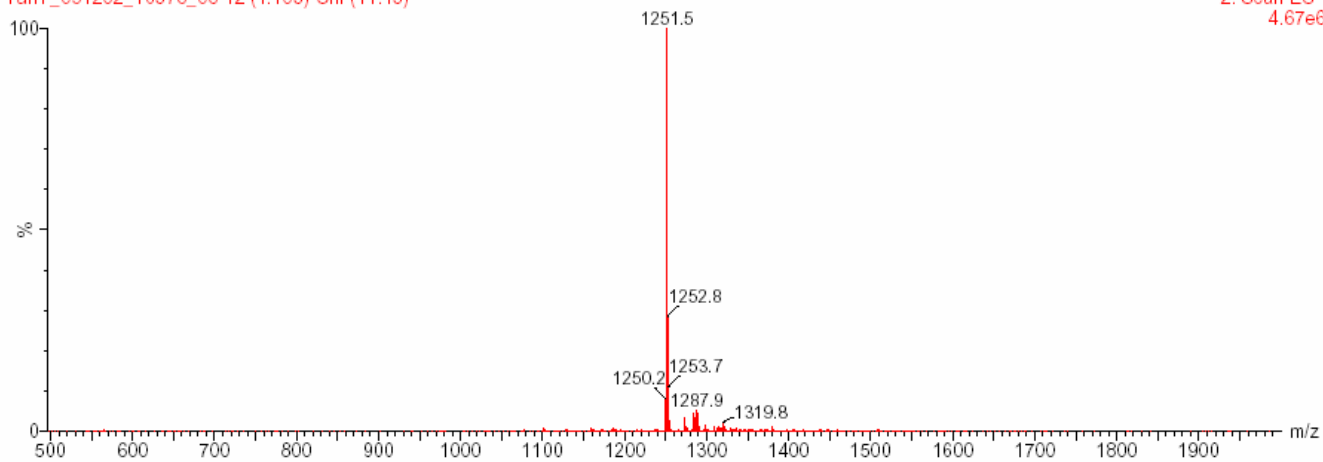

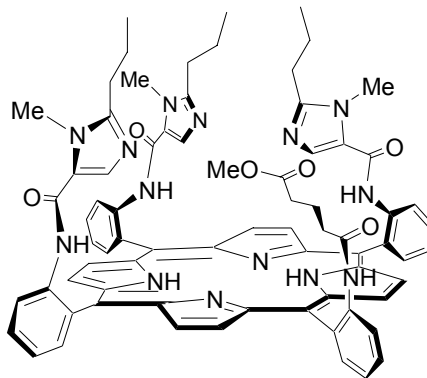

## Compound 14b, High resolution mass analysis

### Elemental Composition Report

Page 1

### Single Mass Analysis

Tolerance = 5.0 PPM / DBE: min = -1.5, max = 120.0

Isotope cluster parameters: Separation = 1.0 Abundance = 1.0%

Monoisotopic Mass, Odd and Even Electron Ions

4972 formula(e) evaluated with 47 results within limits (up to 140 closest results for each mass)

Yilong Yan, Yan-4-41

Cone V = 30

05-Dec-2005

Coll V = 10.0

17:12:13

YANYILONG\_051205\_16381\_YAN-4-41\_HRMS 11 (0.473) Cn (Cen,4, 80.00, Ar); Sm (SG, 2x3.00); Sb (2,20.00); Cm (9:12)

TOF MS ES+

1.41e4

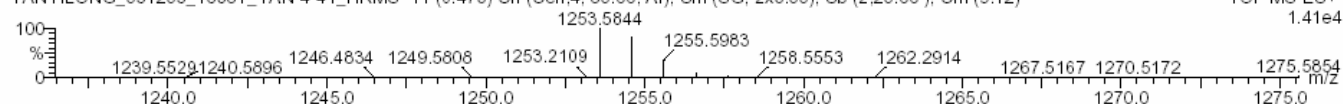

Minimum:

-1.5

Maximum:

200.0 5.0 120.0

| Mass      | Calc. Mass | mDa  | PPM  | DBE  | Score | Formula            |
|-----------|------------|------|------|------|-------|--------------------|
| 1253.5844 | 1253.5846  | -0.2 | -0.1 | 57.5 | 42    | C90 H73 N6 O       |
|           | 1253.5840  | 0.4  | 0.3  | 41.5 | 9     | C76 H78 N8 O8 Na   |
|           | 1253.5840  | 0.4  | 0.3  | 47.0 | 10    | C75 H72 N15 O3 Na  |
|           | 1253.5849  | -0.5 | -0.4 | 53.5 | 43    | C92 H78 O3 Na      |
|           | 1253.5838  | 0.6  | 0.5  | 45.5 | 8     | C74 H73 N14 O6     |
|           | 1253.5851  | -0.7 | -0.6 | 45.0 | 11    | C76 H75 N11 O7     |
|           | 1253.5835  | 0.9  | 0.7  | 54.0 | 41    | C90 H76 N3 O2 Na   |
|           | 1253.5854  | -1.0 | -0.8 | 46.5 | 13    | C77 H74 N12 O4 Na  |
|           | 1253.5854  | -1.0 | -0.8 | 41.0 | 12    | C78 H80 N5 O9 Na   |
|           | 1253.5832  | 1.2  | 0.9  | 52.5 | 39    | C89 H77 N2 O5      |
|           | 1253.5832  | 1.2  | 0.9  | 58.0 | 40    | C88 H71 N9         |
|           | 1253.5859  | -1.5 | -1.2 | 57.0 | 44    | C92 H75 N3 O2      |
|           | 1253.5827  | 1.7  | 1.4  | 42.0 | 7     | C74 H76 N11 O7 Na  |
|           | 1253.5824  | 2.0  | 1.6  | 40.5 | 6     | C73 H77 N10 O10    |
|           | 1253.5864  | -2.0 | -1.6 | 50.0 | 15    | C77 H71 N15 O3     |
|           | 1253.5864  | -2.0 | -1.6 | 44.5 | 14    | C78 H77 N8 O8      |
|           | 1253.5822  | 2.2  | 1.8  | 54.5 | 38    | C88 H74 N6 O Na    |
|           | 1253.5867  | -2.3 | -1.8 | 46.0 | 17    | C79 H76 N9 O5 Na   |
|           | 1253.5867  | -2.3 | -1.8 | 40.5 | 16    | C80 H82 N2 O10 Na  |
|           | 1253.5819  | 2.5  | 2.0  | 53.0 | 37    | C87 H75 N5 O4      |
|           | 1253.5873  | -2.9 | -2.3 | 56.5 | 45    | C94 H77 O3         |
|           | 1253.5813  | 3.1  | 2.4  | 42.5 | 5     | C72 H74 N14 O6 Na  |
|           | 1253.5875  | -3.1 | -2.5 | 58.0 | 46    | C95 H76 N Na       |
|           | 1253.5811  | 3.3  | 2.7  | 41.0 | 4     | C71 H75 N13 O9     |
|           | 1253.5878  | -3.4 | -2.7 | 49.5 | 19    | C79 H73 N12 O4     |
|           | 1253.5878  | -3.4 | -2.7 | 44.0 | 18    | C80 H79 N5 O9      |
|           | 1253.5808  | 3.6  | 2.8  | 49.5 | 35    | C87 H78 N2 O5 Na   |
|           | 1253.5808  | 3.6  | 2.8  | 55.0 | 36    | C86 H72 N9 Na      |
|           | 1253.5880  | -3.6 | -2.9 | 51.0 | 21    | C80 H72 N13 O Na   |
|           | 1253.5881  | -3.7 | -2.9 | 45.5 | 20    | C81 H78 N6 O6 Na   |
|           | 1253.5806  | 3.8  | 3.1  | 48.0 | 33    | C86 H79 N O8       |
|           | 1253.5806  | 3.8  | 3.1  | 53.5 | 34    | C85 H73 N8 O3      |
|           | 1253.5800  | 4.4  | 3.5  | 37.5 | 3     | C71 H78 N10 O10 Na |
|           | 1253.5891  | -4.7 | -3.8 | 49.0 | 23    | C81 H75 N9 O5      |
|           | 1253.5891  | -4.7 | -3.8 | 43.5 | 22    | C82 H81 N2 O10     |
|           | 1253.5795  | 4.9  | 3.9  | 50.0 | 32    | C85 H76 N5 O4 Na   |
|           | 1253.5894  | -5.0 | -4.0 | 50.5 | 25    | C82 H74 N10 O2 Na  |
|           | 1253.5894  | -5.0 | -4.0 | 45.0 | 24    | C83 H80 N3 O7 Na   |
|           | 1253.5792  | 5.2  | 4.1  | 48.5 | 30    | C84 H77 N4 O7      |
|           | 1253.5792  | 5.2  | 4.1  | 54.0 | 31    | C83 H71 N11 O2     |
|           | 1253.5899  | -5.5 | -4.4 | 38.0 | 1     | C68 H76 N15 O8 Na  |
|           | 1253.5900  | -5.6 | -4.4 | 61.0 | 47    | C97 H75 N          |
|           | 1253.5787  | 5.7  | 4.6  | 38.0 | 2     | C69 H76 N13 O9 Na  |
|           | 1253.5905  | -6.1 | -4.8 | 54.0 | 29    | C82 H71 N13 O      |
|           | 1253.5905  | -6.1 | -4.8 | 48.5 | 27    | C83 H77 N6 O6      |
|           | 1253.5782  | 6.2  | 5.0  | 45.0 | 26    | C84 H80 N O8 Na    |
|           | 1253.5782  | 6.2  | 5.0  | 50.5 | 28    | C83 H74 N8 O3 Na   |

[M+H]<sup>+</sup>





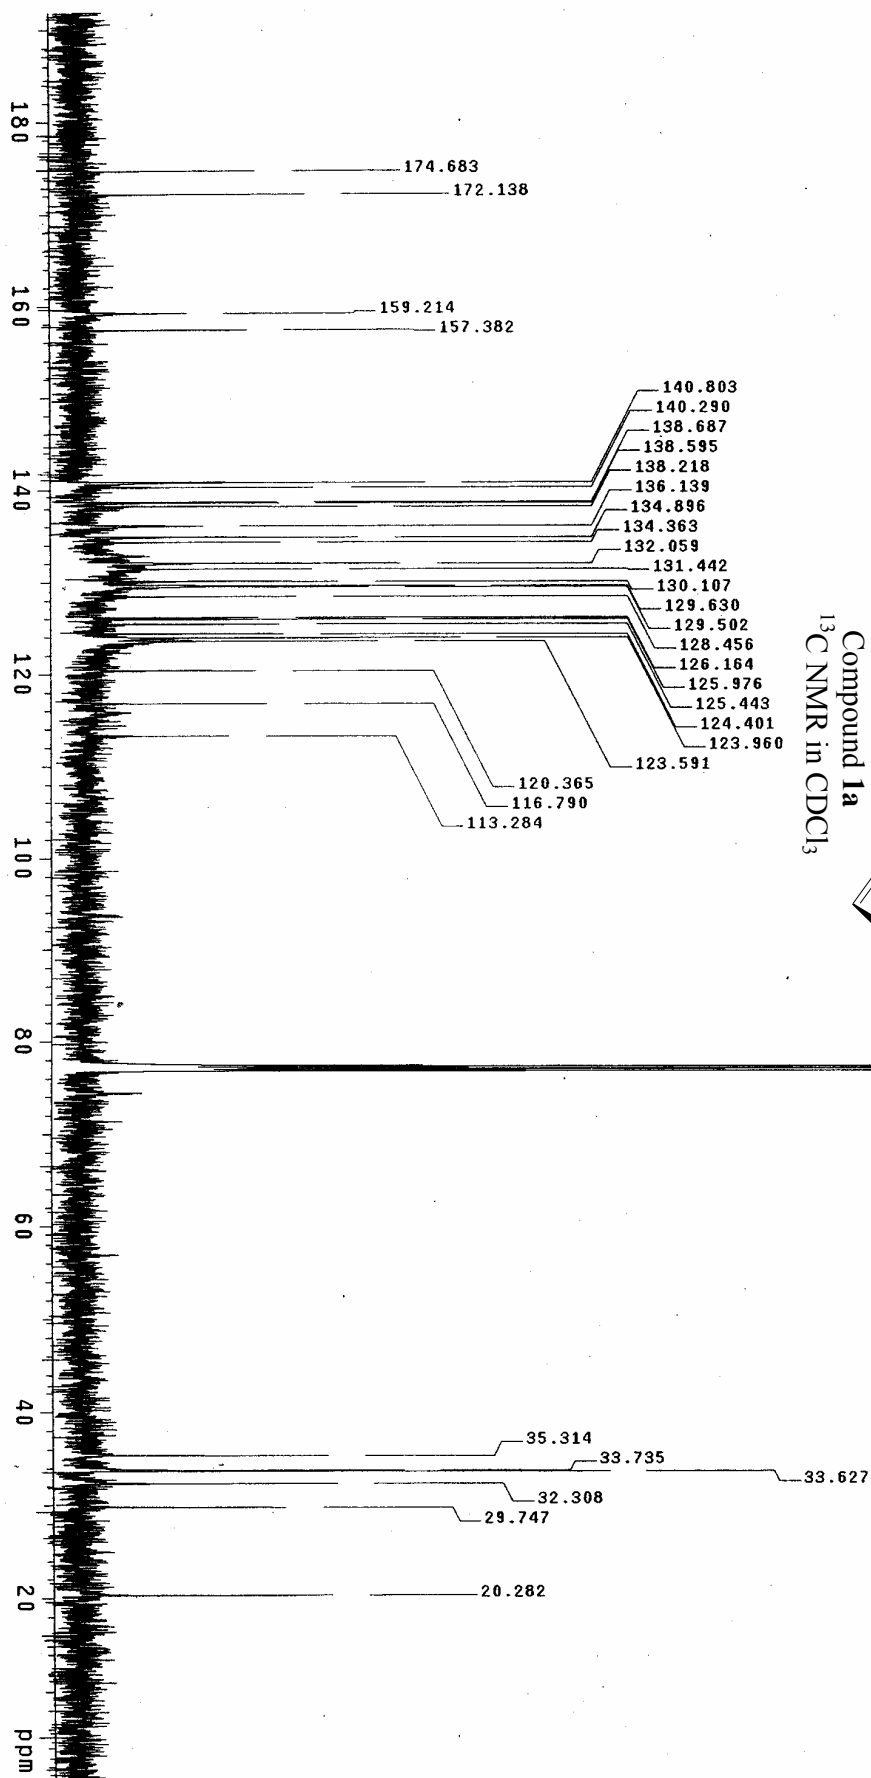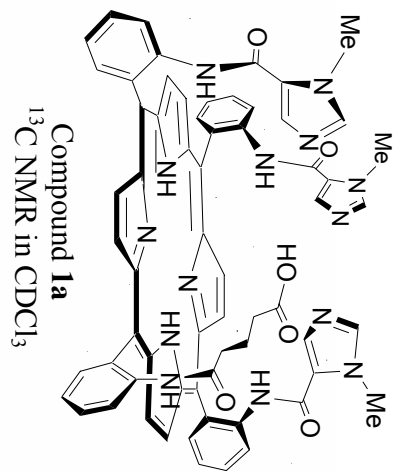

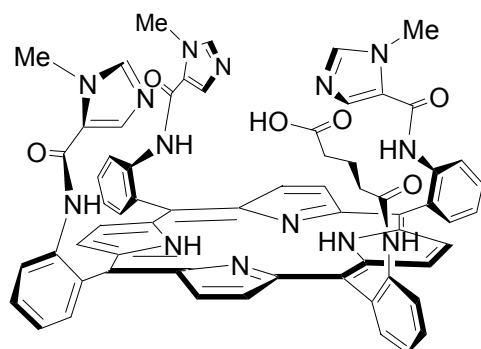

Compound 1a, Low resolution mass analysis

YanY\_051026\_16192\_04 20 (0.956) Cm (16:27)

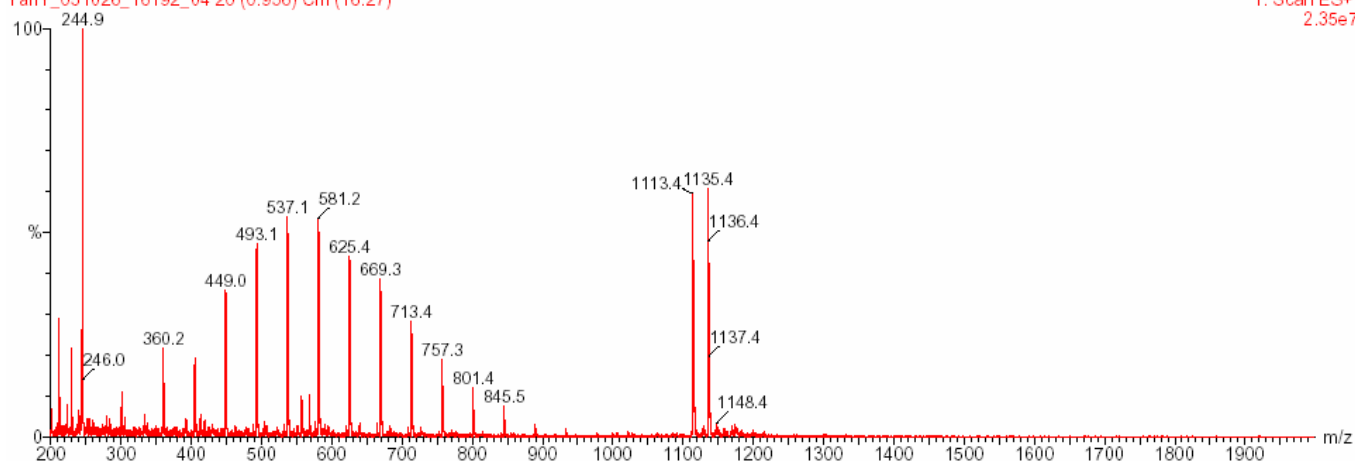

10.41.00  
1: Scan ES+  
2.35e7

Yan-4-35

26-Oct-2005  
16:47:56

YanY\_051026\_16192\_04 20 (0.956) Cm (16:27)

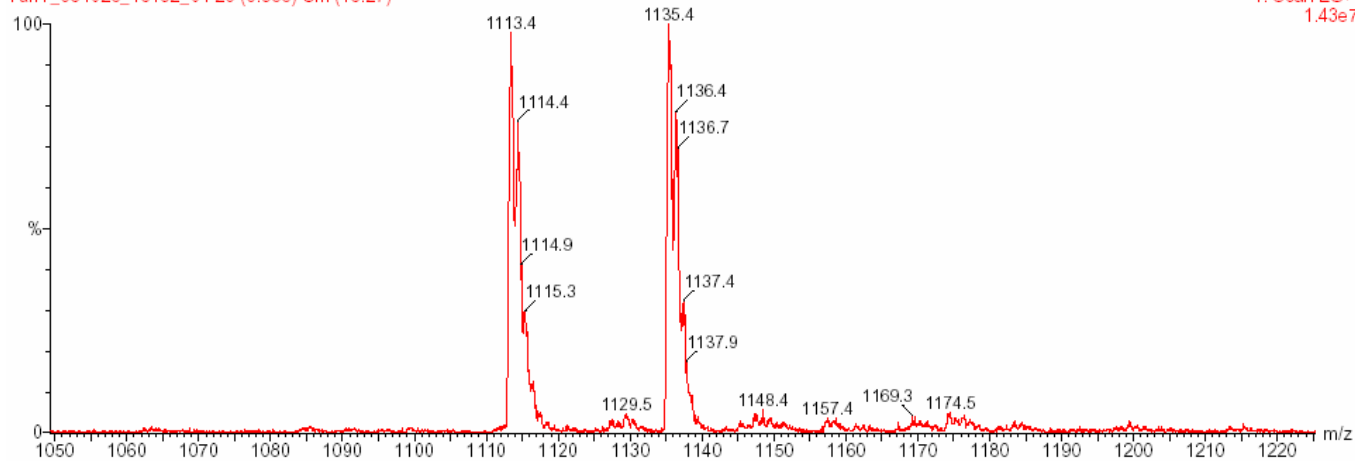

1: Scan ES+  
1.43e7

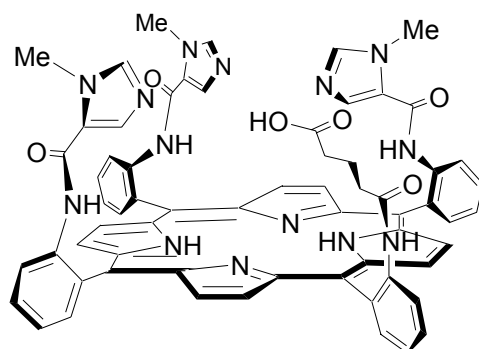

Compound **1a**, High resolution mass analysis

## Elemental Composition Report

Page 1

### Single Mass Analysis

Tolerance = 5.0 PPM / DBE: min = -1.5, max = 120.0

Isotope cluster parameters: Separation = 1.0 Abundance = 1.0%

Monoisotopic Mass, Odd and Even Electron Ions

1811 formula(e) evaluated with 21 results within limits (up to 140 closest results for each mass)

Yilong Yan, Yan-4-35

16129

YANY\_051102\_16247\_YAN-4-35\_HRMS 46 (1.575) Cn (Cen.6, 80.00, Ar); Sm (SG, 2x3.00); Sb (2,20.00); Cm (46:54)

Cone V = 30

Coll V = 10.0

02-Nov-2005

11:25:01

TOF MS ES+

4.14e4

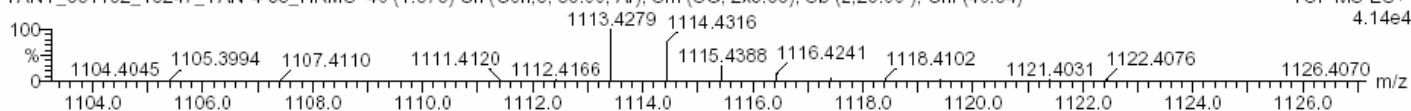

Minimum: -1.5  
Maximum: 200.0 5.0 120.0

| Mass      | Calc. Mass | mDa  | PPM  | DBE  | Score | Formula                                 |
|-----------|------------|------|------|------|-------|-----------------------------------------|
| 1113.4279 | 1113.4281  | -0.2 | -0.2 | 57.5 | 18    | C80 H53 N6 O ← <b>[M+H]<sup>+</sup></b> |
|           | 1113.4273  | 0.6  | 0.6  | 45.5 | 3     | C64 H53 N14 O6                          |
|           | 1113.4286  | -0.7 | -0.6 | 45.0 | 4     | C66 H55 N11 O7                          |
|           | 1113.4267  | 1.2  | 1.0  | 52.5 | 16    | C79 H57 N2 O5                           |
|           | 1113.4267  | 1.2  | 1.0  | 58.0 | 17    | C78 H51 N9                              |
|           | 1113.4294  | -1.5 | -1.4 | 57.0 | 19    | C82 H55 N3 O2                           |
|           | 1113.4259  | 2.0  | 1.8  | 40.5 | 1     | C63 H57 N10 O10                         |
|           | 1113.4299  | -2.0 | -1.8 | 50.0 | 8     | C67 H51 N15 O3                          |
|           | 1113.4299  | -2.0 | -1.8 | 44.5 | 5     | C68 H57 N8 O8                           |
|           | 1113.4254  | 2.5  | 2.2  | 53.0 | 15    | C77 H55 N5 O4                           |
|           | 1113.4308  | -2.9 | -2.6 | 56.5 | 20    | C84 H57 O3                              |
|           | 1113.4246  | 3.3  | 3.0  | 41.0 | 2     | C61 H55 N13 O9                          |
|           | 1113.4313  | -3.4 | -3.0 | 49.5 | 9     | C69 H53 N12 O4                          |
|           | 1113.4313  | -3.4 | -3.0 | 44.0 | 7     | C70 H59 N5 O9                           |
|           | 1113.4241  | 3.8  | 3.4  | 48.0 | 12    | C76 H59 N O8                            |
|           | 1113.4241  | 3.8  | 3.4  | 53.5 | 14    | C75 H53 N8 O3                           |
|           | 1113.4326  | -4.7 | -4.2 | 49.0 | 10    | C71 H55 N9 O5                           |
|           | 1113.4326  | -4.7 | -4.2 | 43.5 | 6     | C72 H61 N2 O10                          |
|           | 1113.4227  | 5.2  | 4.6  | 48.5 | 11    | C74 H57 N4 O7                           |
|           | 1113.4227  | 5.2  | 4.7  | 54.0 | 13    | C73 H51 N11 O2                          |
|           | 1113.4335  | -5.6 | -5.0 | 61.0 | 21    | C87 H55 N                               |

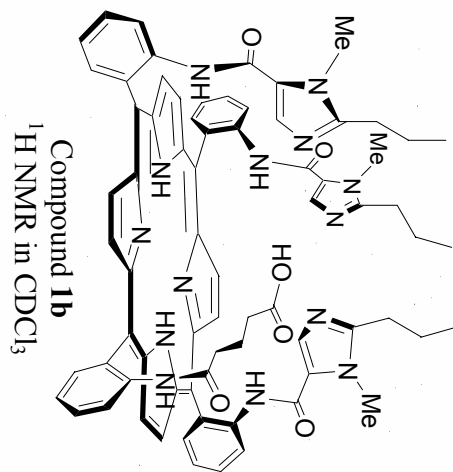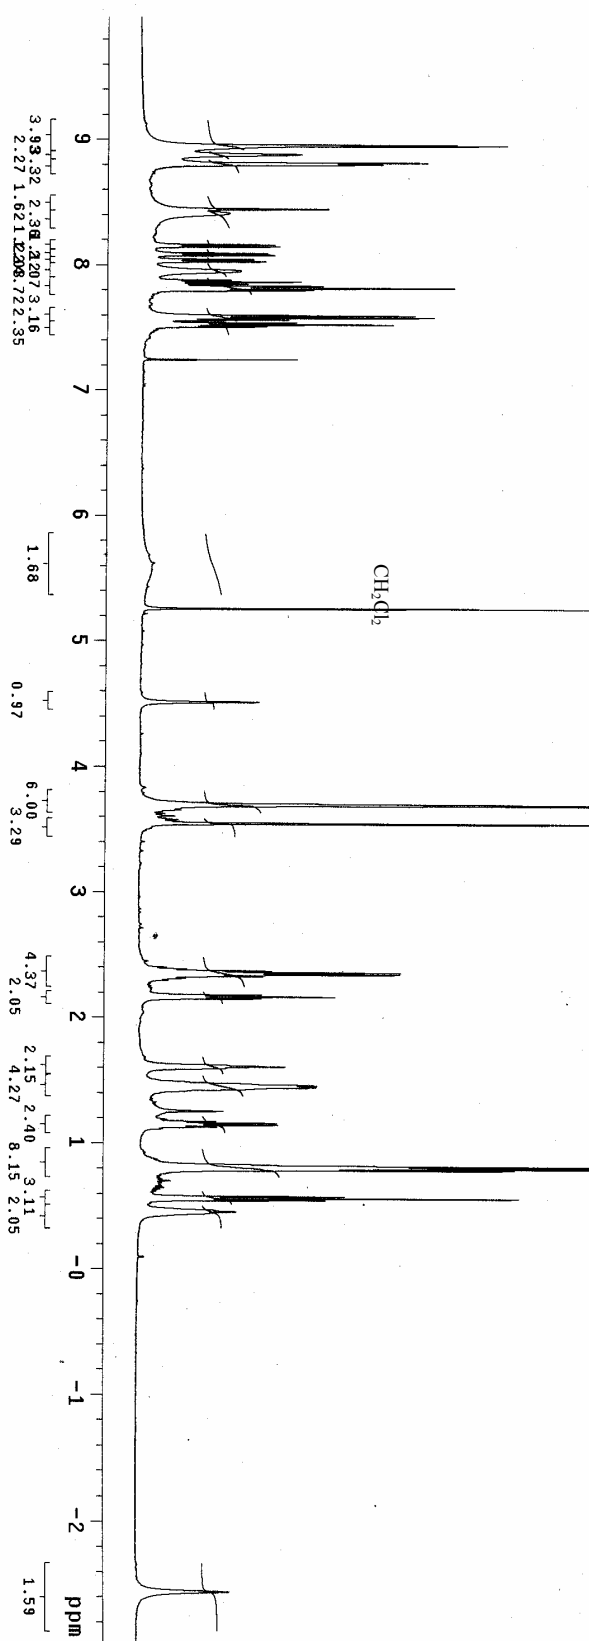

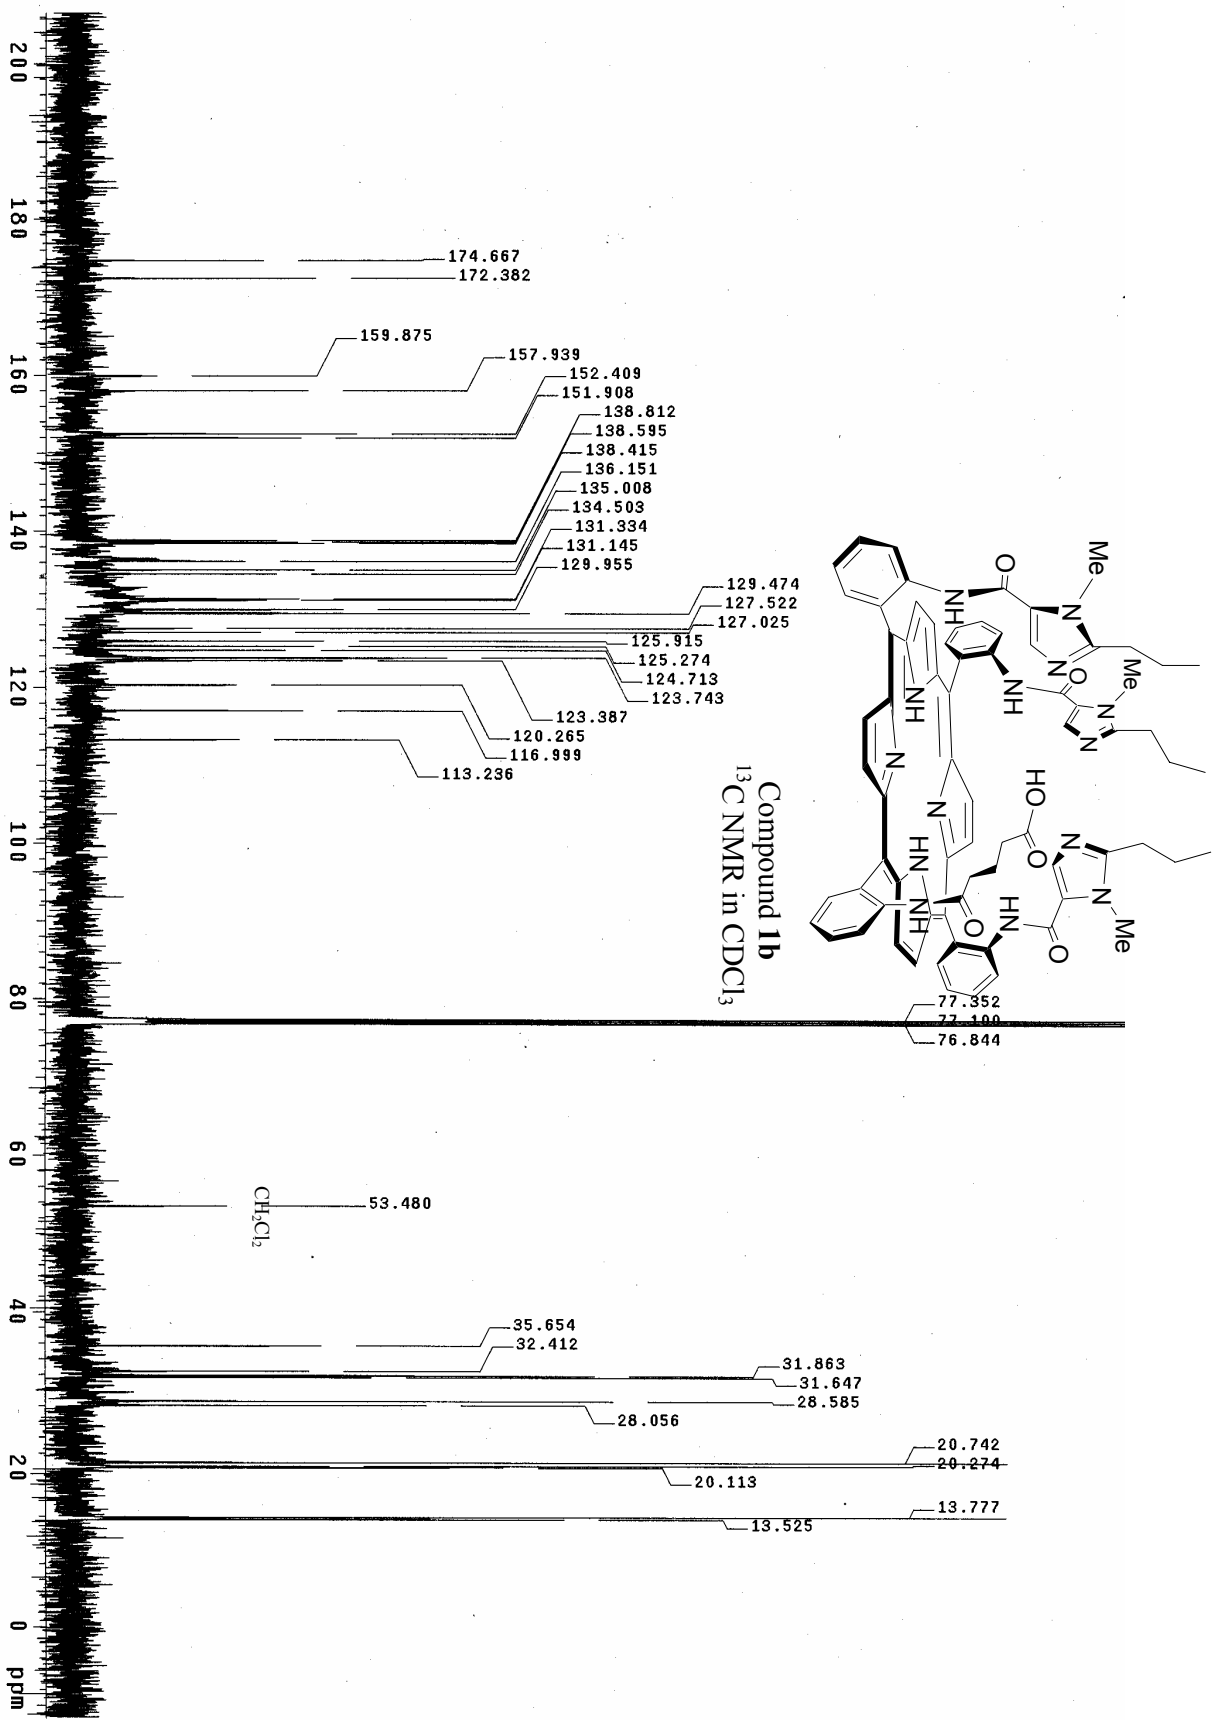

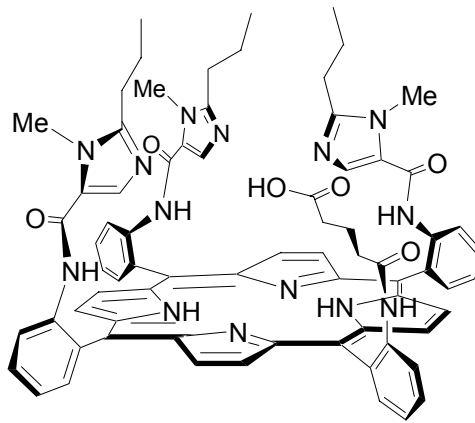

Compound **1b**, Low resolution mass analysis

YanY\_051202\_16376\_04 13 (1.137) Cm (10:18)

1: Scan ES+  
1.41e8

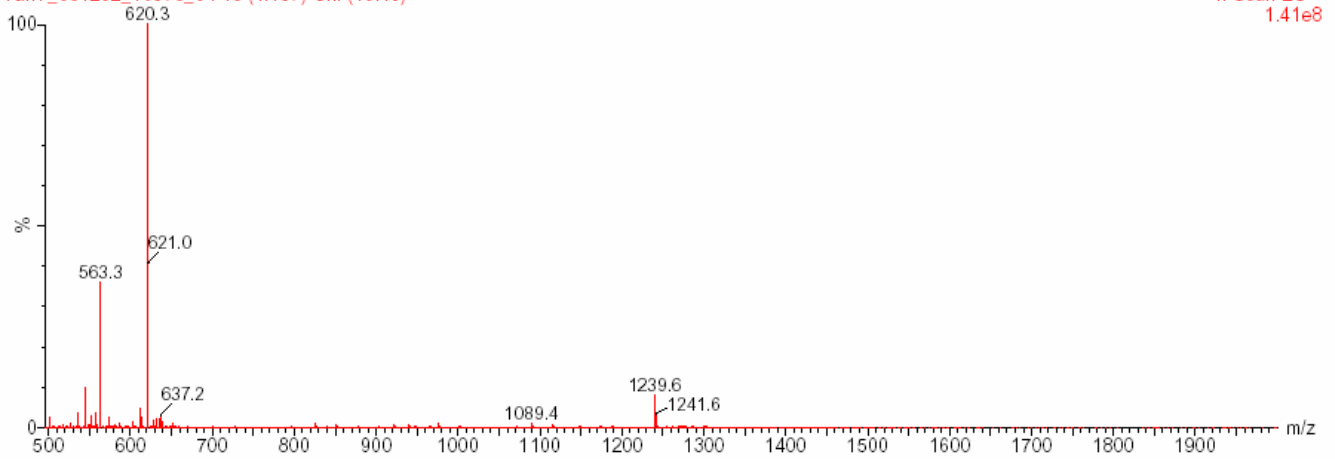

Yan-4-43

YanY\_051202\_16376\_04 13 (1.170) Cm (10:15)

2: Scan ES-  
3.95e6

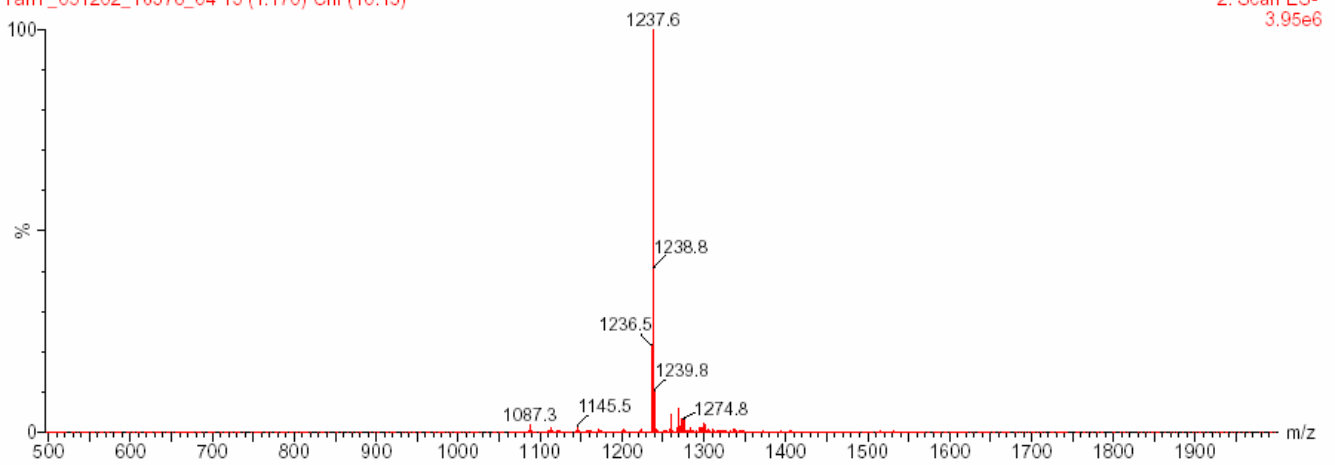

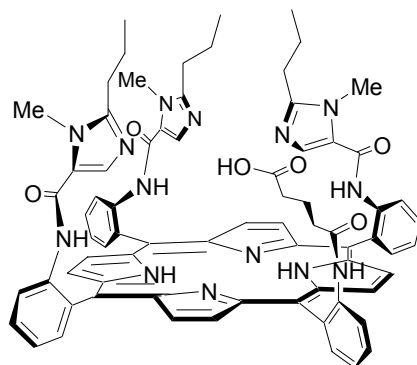

## Compound 1b, High resolution mass analysis

### Elemental Composition Report

Page 1

### Single Mass Analysis

Tolerance = 5.0 PPM / DBE: min = -1.5, max = 120.0

Isotope cluster parameters: Separation = 1.0 Abundance = 1.0%

Monoisotopic Mass, Odd and Even Electron Ions

4924 formula(e) evaluated with 48 results within limits (up to 140 closest results for each mass)

Yilong Yan, Yan-4-43

Cone V = 30

Coll V = 10.0

05-Dec-2005

17:01:48

YANYILONG\_051205\_16381\_YAN-4-43\_HRMS 12 (0.516) Cn (Cen,4, 80.00, Ar); Sm (SG, 2x3.00); Sb (2.20.00); Cm (5:13)

TOF MS ES+

1.10e4

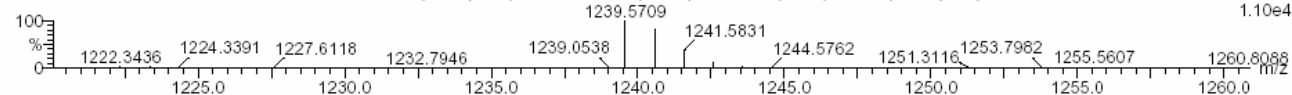

Minimum: -1.5  
Maximum: 200.0 5.0 120.0

| Mass      | Calc. Mass | mDa  | PPM  | DBE  | Score | Formula                             |
|-----------|------------|------|------|------|-------|-------------------------------------|
| 1239.5709 | 1239.5708  | 0.1  | 0.1  | 44.5 | 15    | C77 H75 N8 O8                       |
|           | 1239.5708  | 0.1  | 0.1  | 50.0 | 17    | C76 H69 N15 O3                      |
|           | 1239.5711  | -0.2 | -0.1 | 46.0 | 18    | C78 H74 N9 O5 Na                    |
|           | 1239.5711  | -0.2 | -0.1 | 40.5 | 16    | C79 H80 N2 O10 Na                   |
|           | 1239.5703  | 0.6  | 0.5  | 57.0 | 45    | C91 H73 N3 O2                       |
|           | 1239.5716  | -0.7 | -0.6 | 56.5 | 46    | C93 H75 O3                          |
|           | 1239.5719  | -1.0 | -0.8 | 58.0 | 47    | C94 H74 N Na                        |
|           | 1239.5697  | 1.2  | 0.9  | 41.0 | 13    | C77 H78 N5 O9 Na                    |
|           | 1239.5697  | 1.2  | 1.0  | 46.5 | 14    | C76 H72 N12 O4 Na                   |
|           | 1239.5721  | -1.2 | -1.0 | 49.5 | 20    | C78 H71 N12 O4                      |
|           | 1239.5721  | -1.2 | -1.0 | 44.0 | 19    | C79 H77 N5 O9                       |
|           | 1239.5694  | 1.5  | 1.2  | 45.0 | 12    | C75 H73 N11 O7                      |
|           | 1239.5724  | -1.5 | -1.2 | 51.0 | 23    | C79 H70 N13 O Na                    |
|           | 1239.5724  | -1.5 | -1.2 | 45.5 | 21    | C80 H76 N6 O6 Na                    |
|           | 1239.5692  | 1.7  | 1.4  | 53.5 | 44    | C91 H76 O3 Na                       |
|           | 1239.5689  | 2.0  | 1.6  | 57.5 | 43    | C89 H71 N6 O                        |
|           | 1239.5684  | 2.5  | 2.0  | 41.5 | 9     | C75 H76 N8 O8 Na                    |
|           | 1239.5684  | 2.5  | 2.0  | 47.0 | 10    | C74 H70 N15 O3 Na                   |
|           | 1239.5735  | -2.6 | -2.1 | 49.0 | 24    | C80 H73 N9 O5                       |
|           | 1239.5735  | -2.6 | -2.1 | 43.5 | 22    | C81 H79 N2 O10                      |
|           | 1239.5681  | 2.8  | 2.3  | 45.5 | 8     | C73 H71 N14 O6 ← [M+H] <sup>+</sup> |
|           | 1239.5737  | -2.8 | -2.3 | 50.5 | 26    | C81 H72 N10 O2 Na                   |
|           | 1239.5737  | -2.8 | -2.3 | 45.0 | 25    | C82 H78 N3 O7 Na                    |
|           | 1239.5679  | 3.0  | 2.4  | 54.0 | 42    | C89 H74 N3 O2 Na                    |
|           | 1239.5676  | 3.3  | 2.7  | 52.5 | 40    | C88 H75 N2 O5                       |
|           | 1239.5676  | 3.3  | 2.7  | 58.0 | 41    | C87 H69 N9                          |
|           | 1239.5742  | -3.3 | -2.7 | 38.0 | 11    | C67 H74 N15 O8 Na                   |
|           | 1239.5743  | -3.4 | -2.7 | 61.0 | 48    | C96 H73 N                           |
|           | 1239.5670  | 3.9  | 3.1  | 42.0 | 7     | C73 H74 N11 O7 Na                   |
|           | 1239.5748  | -3.9 | -3.1 | 54.0 | 29    | C81 H69 N13 O                       |
|           | 1239.5748  | -3.9 | -3.2 | 48.5 | 27    | C82 H75 N6 O6                       |
|           | 1239.5668  | 4.1  | 3.3  | 40.5 | 3     | C72 H75 N10 O10                     |
|           | 1239.5751  | -4.2 | -3.4 | 50.0 | 30    | C83 H74 N7 O3 Na                    |
|           | 1239.5751  | -4.2 | -3.4 | 44.5 | 28    | C84 H80 O8 Na                       |
|           | 1239.5665  | 4.4  | 3.5  | 54.5 | 39    | C87 H72 N6 O Na                     |
|           | 1239.5663  | 4.6  | 3.7  | 53.0 | 38    | C86 H73 N5 O4                       |
|           | 1239.5756  | -4.7 | -3.8 | 37.5 | 6     | C69 H76 N12 O9 Na                   |
|           | 1239.5657  | 5.2  | 4.2  | 42.5 | 5     | C71 H72 N14 O6 Na                   |
|           | 1239.5761  | -5.2 | -4.2 | 53.5 | 32    | C83 H71 N10 O2                      |
|           | 1239.5762  | -5.3 | -4.2 | 48.0 | 31    | C84 H77 N3 O7                       |
|           | 1239.5654  | 5.5  | 4.4  | 41.0 | 2     | C70 H73 N13 O9                      |
|           | 1239.5764  | -5.5 | -4.5 | 49.5 | 34    | C85 H76 N4 O4 Na                    |
|           | 1239.5652  | 5.7  | 4.6  | 49.5 | 36    | C86 H76 N2 O5 Na                    |
|           | 1239.5652  | 5.7  | 4.6  | 55.0 | 37    | C85 H70 N9 Na                       |
|           | 1239.5767  | -5.8 | -4.6 | 41.0 | 4     | C69 H73 N15 O8                      |
|           | 1239.5649  | 6.0  | 4.8  | 48.0 | 33    | C85 H77 N O8                        |
|           | 1239.5649  | 6.0  | 4.8  | 53.5 | 35    | C84 H71 N8 O3                       |
|           | 1239.5769  | -6.0 | -4.9 | 37.0 | 1     | C71 H78 N9 O10 Na                   |

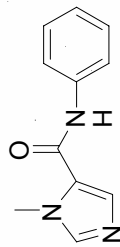

Compound 15  
<sup>1</sup>H NMR in CDCl<sub>3</sub>

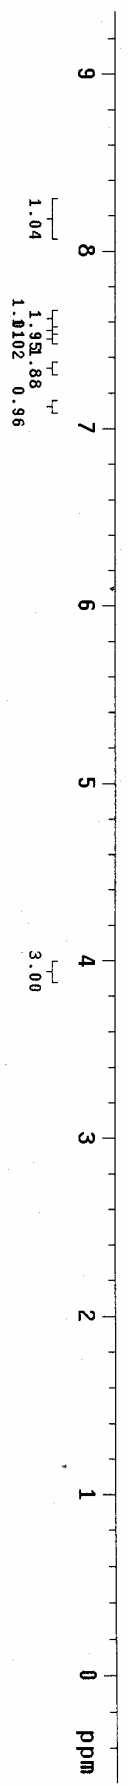



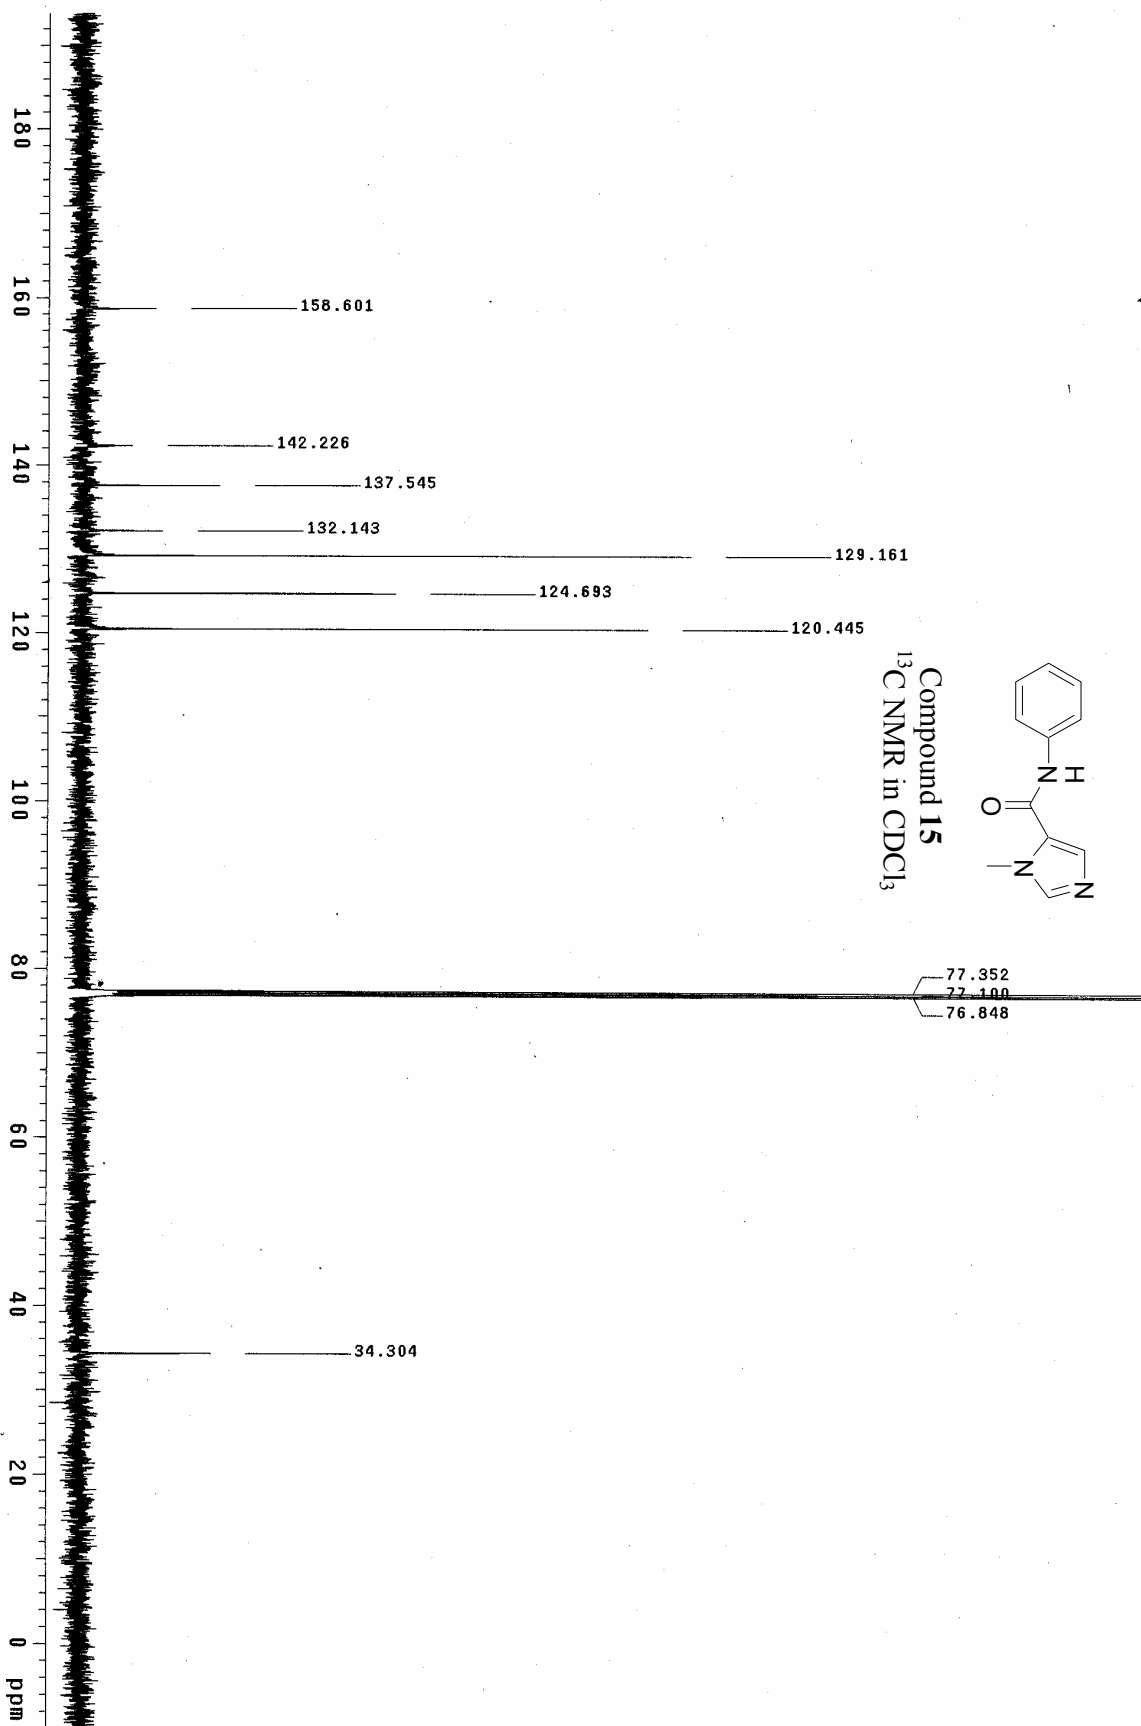

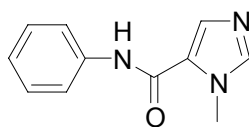

### Compound 15, Low resolution mass analysis

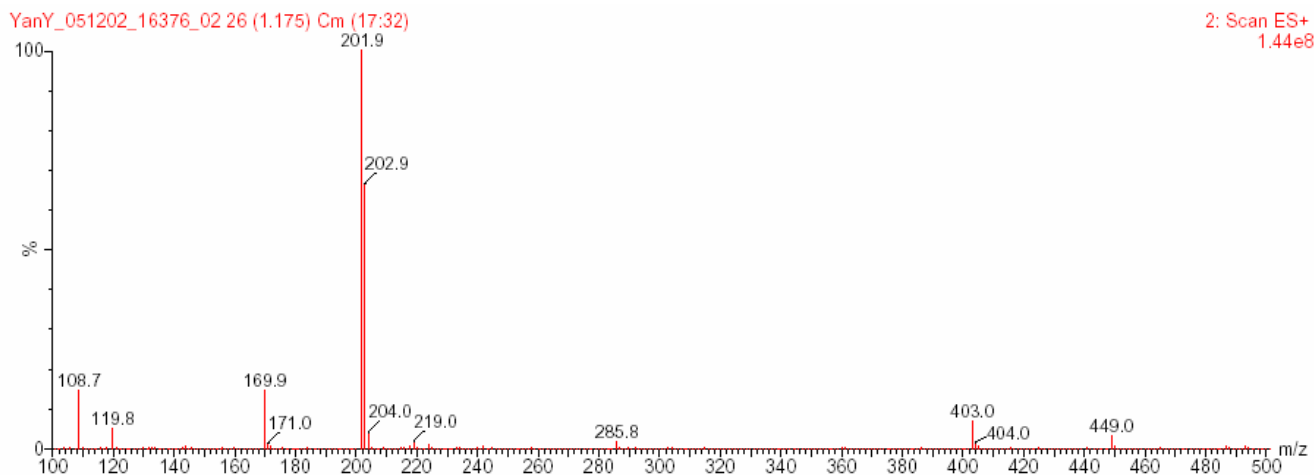

### Compound 15, High resolution mass analysis

#### Elemental Composition Report

Page 1

#### Single Mass Analysis

Tolerance = 5.0 PPM / DBE: min = -1.5, max = 120.0

Isotope cluster parameters: Separation = 1.0 Abundance = 1.0%

Monoisotopic Mass, Odd and Even Electron Ions

359 formula(e) evaluated with 2 results within limits (up to 140 closest results for each mass)

Yilong Yan, Yan-4-45

Cone V = 30

05-Dec-2005

Coll V = 30.0

16:16:46

YANYILONG\_051205\_YAN-4-45\_HRMS 56 (2.375) Cn (Cen,4, 80.00, Ar); Sm (SG, 2x3.00); Sb (2,20.00); Cm (45:61)

TOF MS ES+

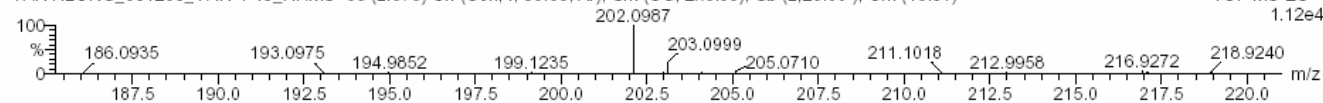

Minimum: -1.5  
Maximum: 200.0 5.0 120.0

| Mass     | Calc. Mass | mDa  | PPM  | DBE | Score | Formula                           |
|----------|------------|------|------|-----|-------|-----------------------------------|
| 202.0987 | 202.0980   | 0.7  | 3.3  | 7.5 | 2     | C11 H12 N3 O ← [M+H] <sup>+</sup> |
|          | 202.0994   | -0.7 | -3.4 | 7.0 | 1     | C13 H14 N2 O                      |

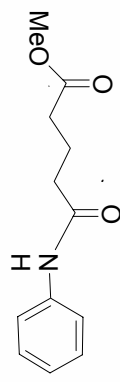

Compound 16  
<sup>1</sup>H NMR in CDCl<sub>3</sub>

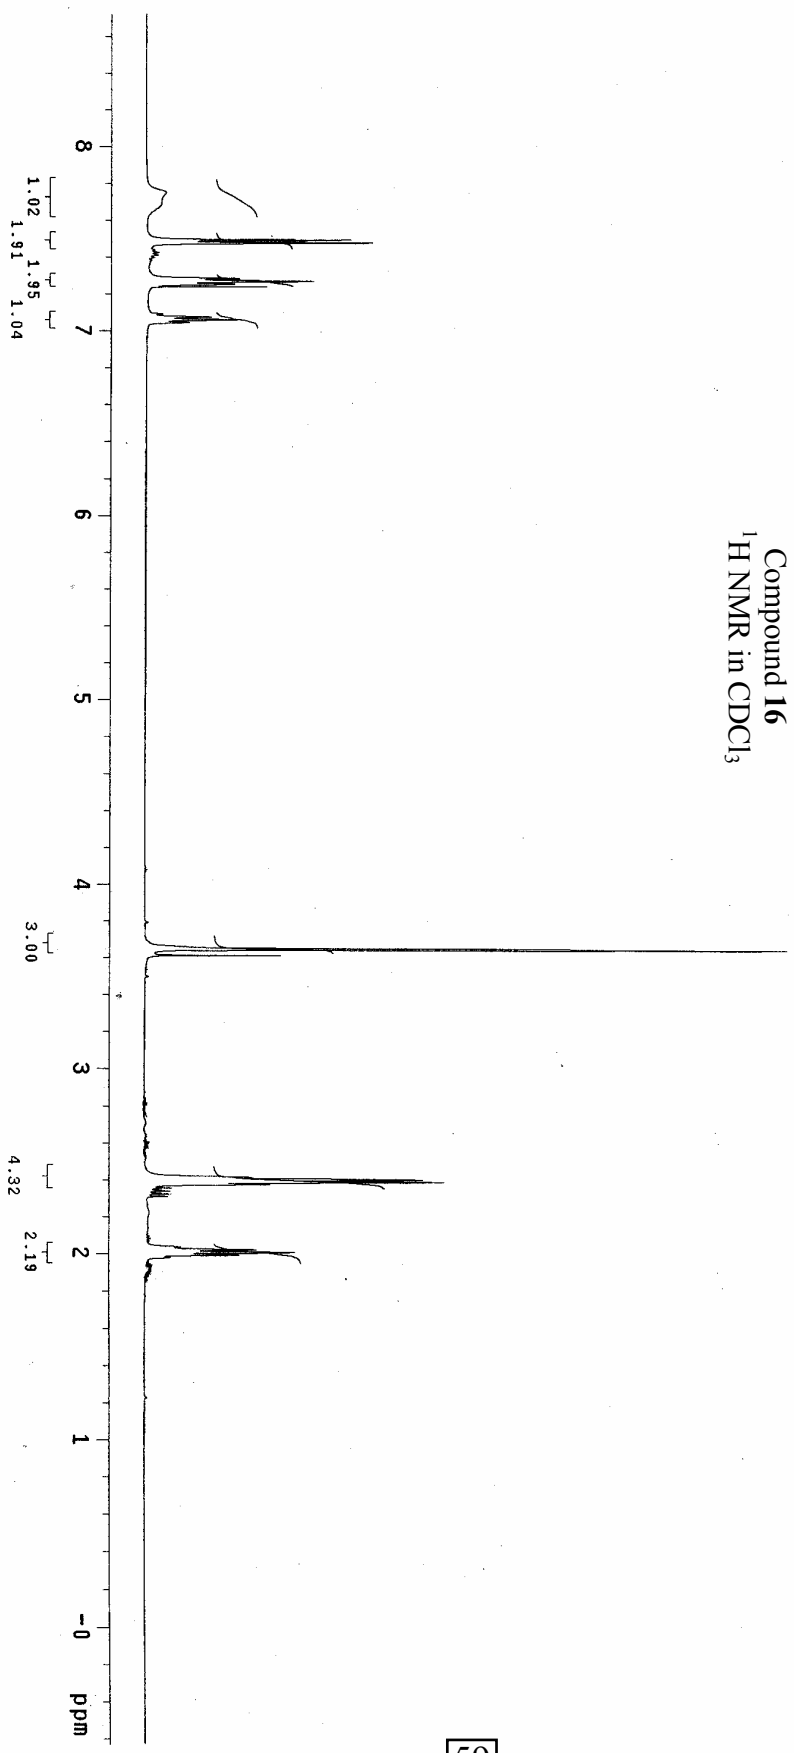

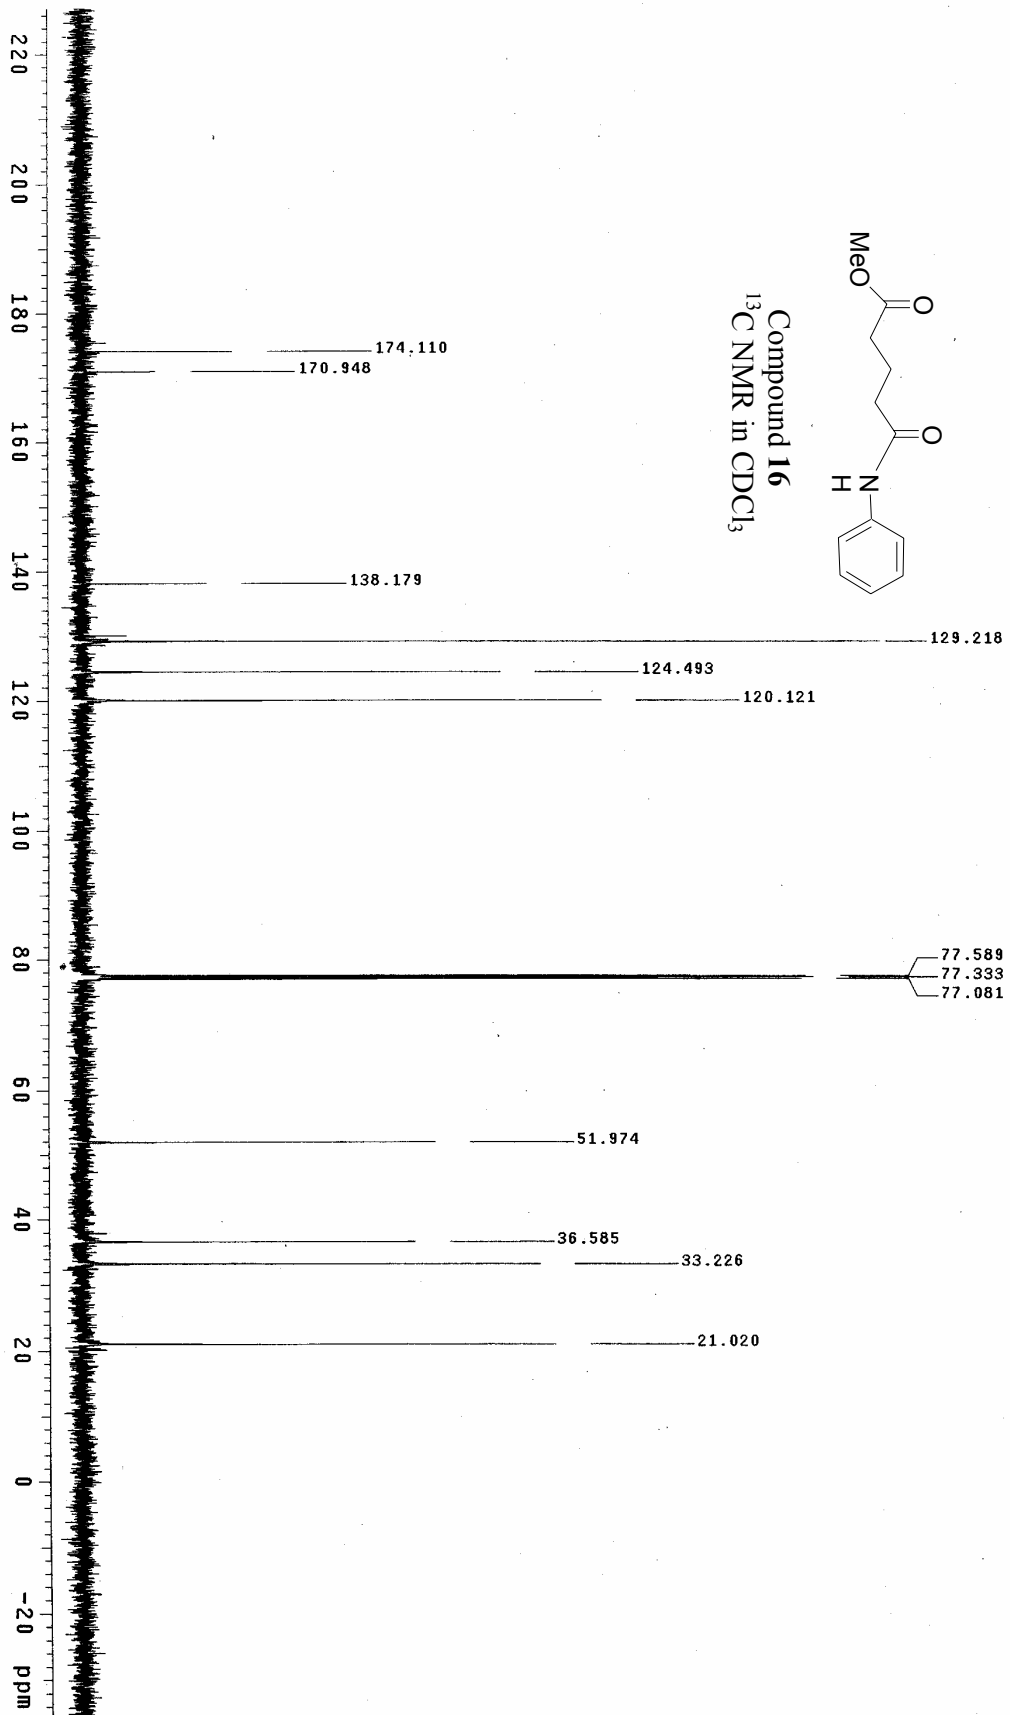

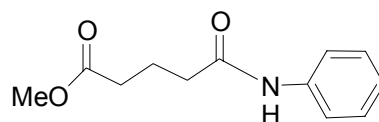

Compound 16, Low resolution mass analysis

YanY\_051202\_16376\_05 21 (1.007) Cm (18:27)

2: Scan ES+  
1.19e8

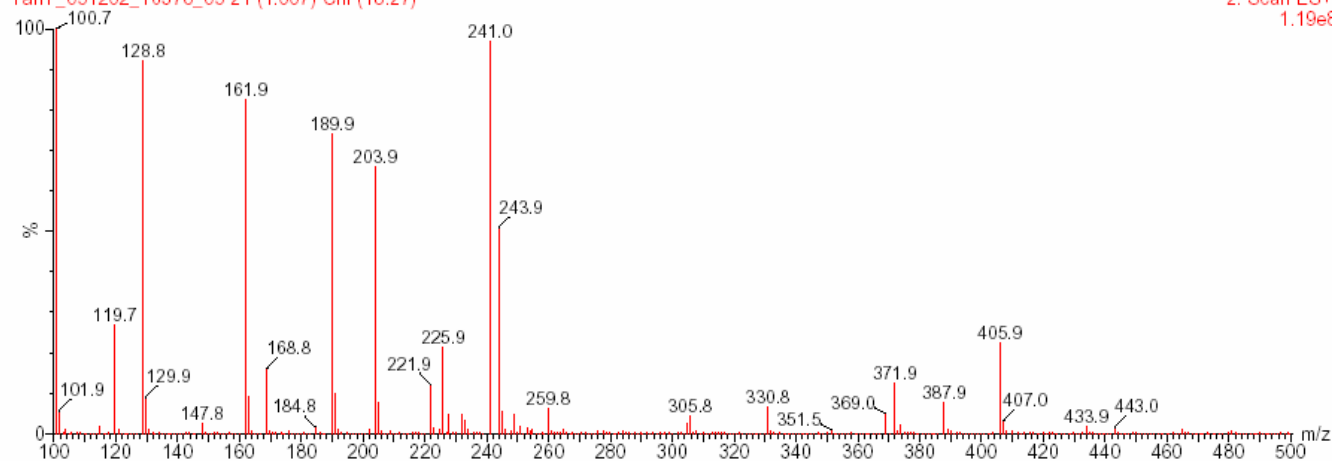

Compound 16, High resolution mass analysis

Elemental Composition Report

Single Mass Analysis

Tolerance = 5.0 PPM / DBE: min = -1.5, max = 120.0  
Isotope cluster parameters: Separation = 1.0 Abundance = 1.0%

Monoisotopic Mass, Odd and Even Electron Ions  
439 formula(e) evaluated with 3 results within limits (up to 140 closest results for each mass)

Yilong Yan, Yan-4-42  
Cone V = 30  
Coll V = 10.0  
YANYILONG\_051205\_16381\_YAN-4-42\_HRMS 10 (0.430) Cn (Cen.4, 80.00, Ar); Sm (SG, 2x3.00); Sb (2.20.00); Cm (6:11)  
05-Dec-2005  
16:34:21  
TOF MS ES+  
4.41e3

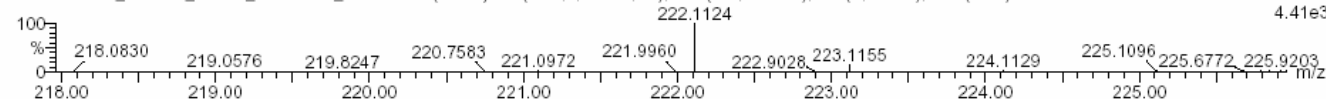

Minimum: -1.5  
Maximum: 200.0 5.0 120.0

| Mass     | Calc. Mass | mDa  | PPM  | DBE | Score | Formula                           |
|----------|------------|------|------|-----|-------|-----------------------------------|
| 222.1124 | 222.1130   | -0.6 | -2.8 | 5.5 | 1     | C12 H16 N O3 ← [M+H] <sup>+</sup> |
|          | 222.1117   | 0.7  | 3.3  | 6.0 | 3     | C10 H14 N4 O2                     |
|          | 222.1133   | -0.9 | -4.0 | 7.0 | 2     | C13 H15 N2 Na                     |
